# Supplementary material for: Identifying modifiable risk factors of lung cancer: Indications from Mendelian randomization
Source: PubMed Central journal article supplement (PMC8523078; doi:10.1371/journal.pone.0258498), 2021-10-18

**A**

MR Test

/ Inverse variance weighted
 / MR Egger
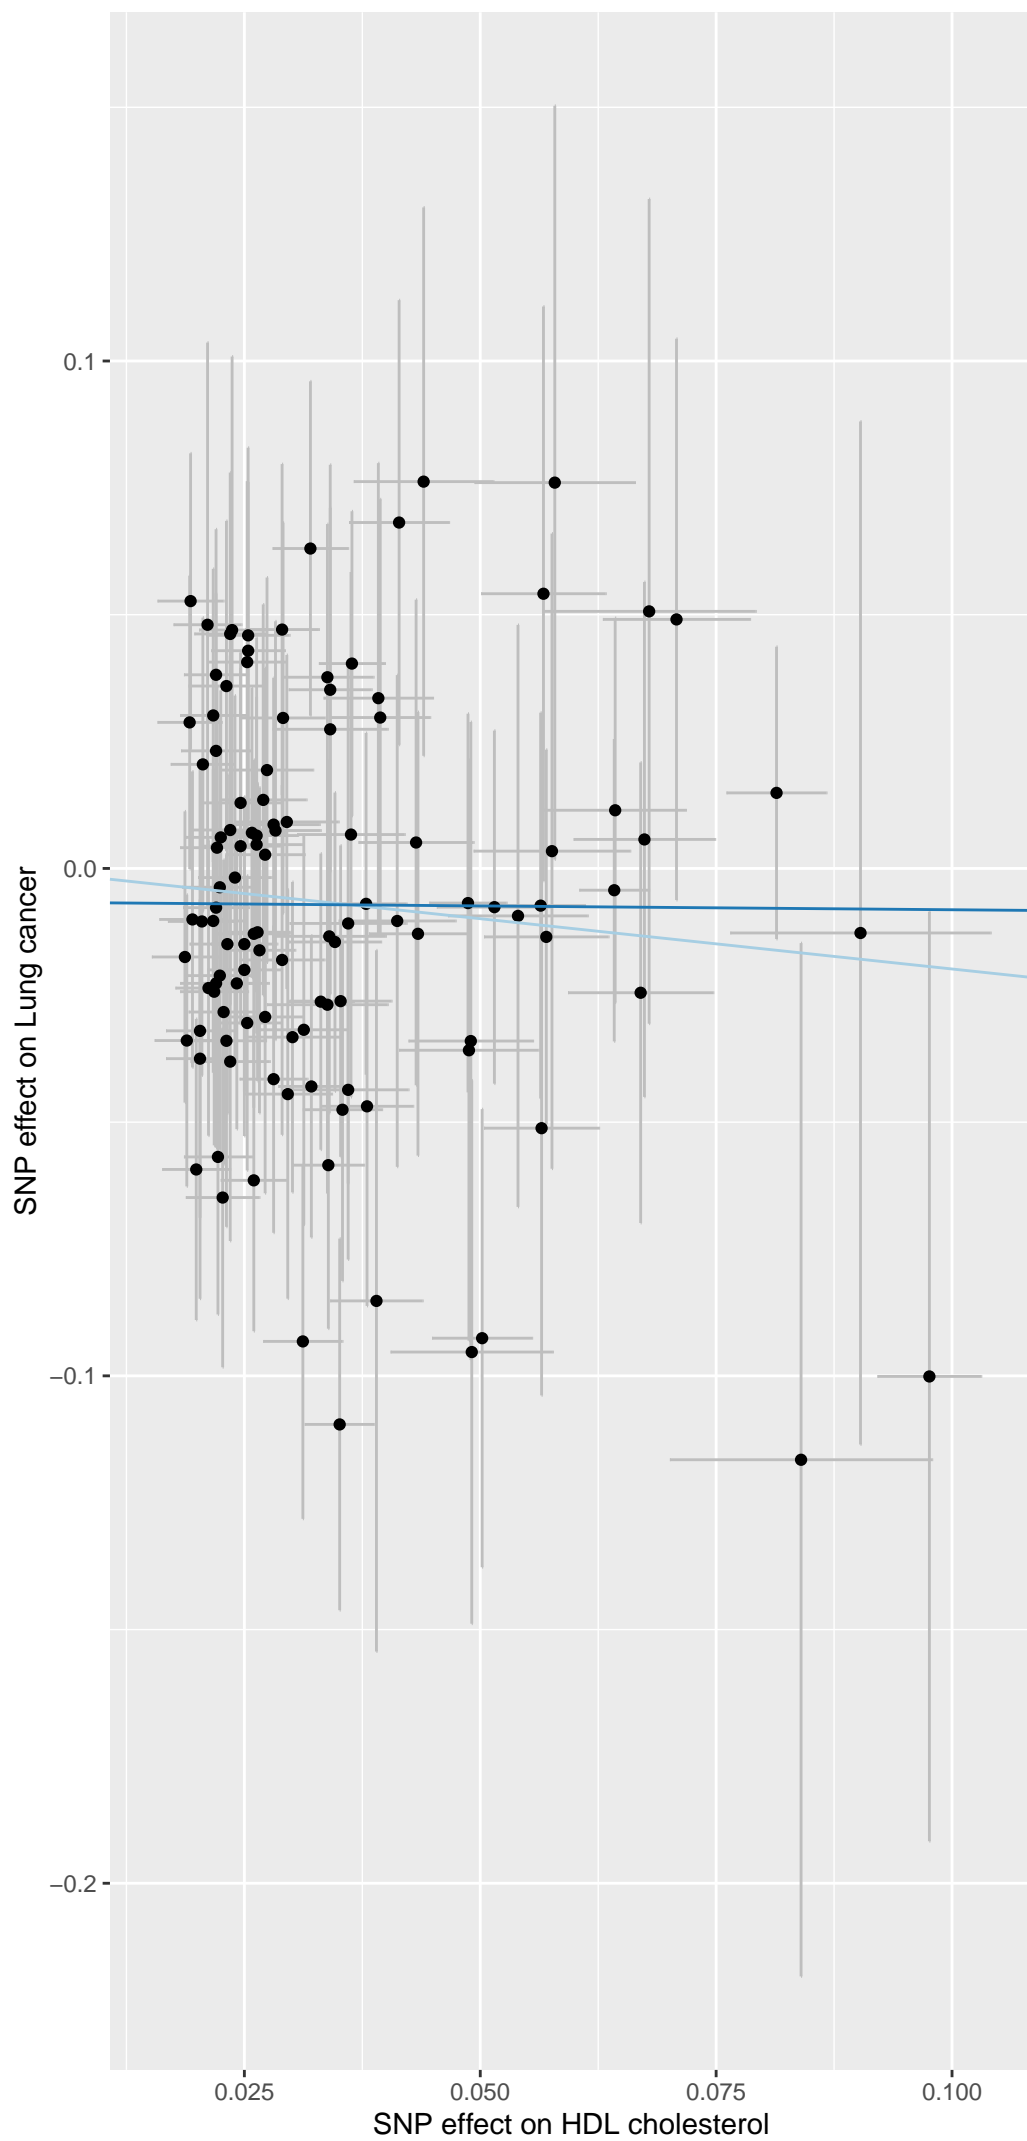**B**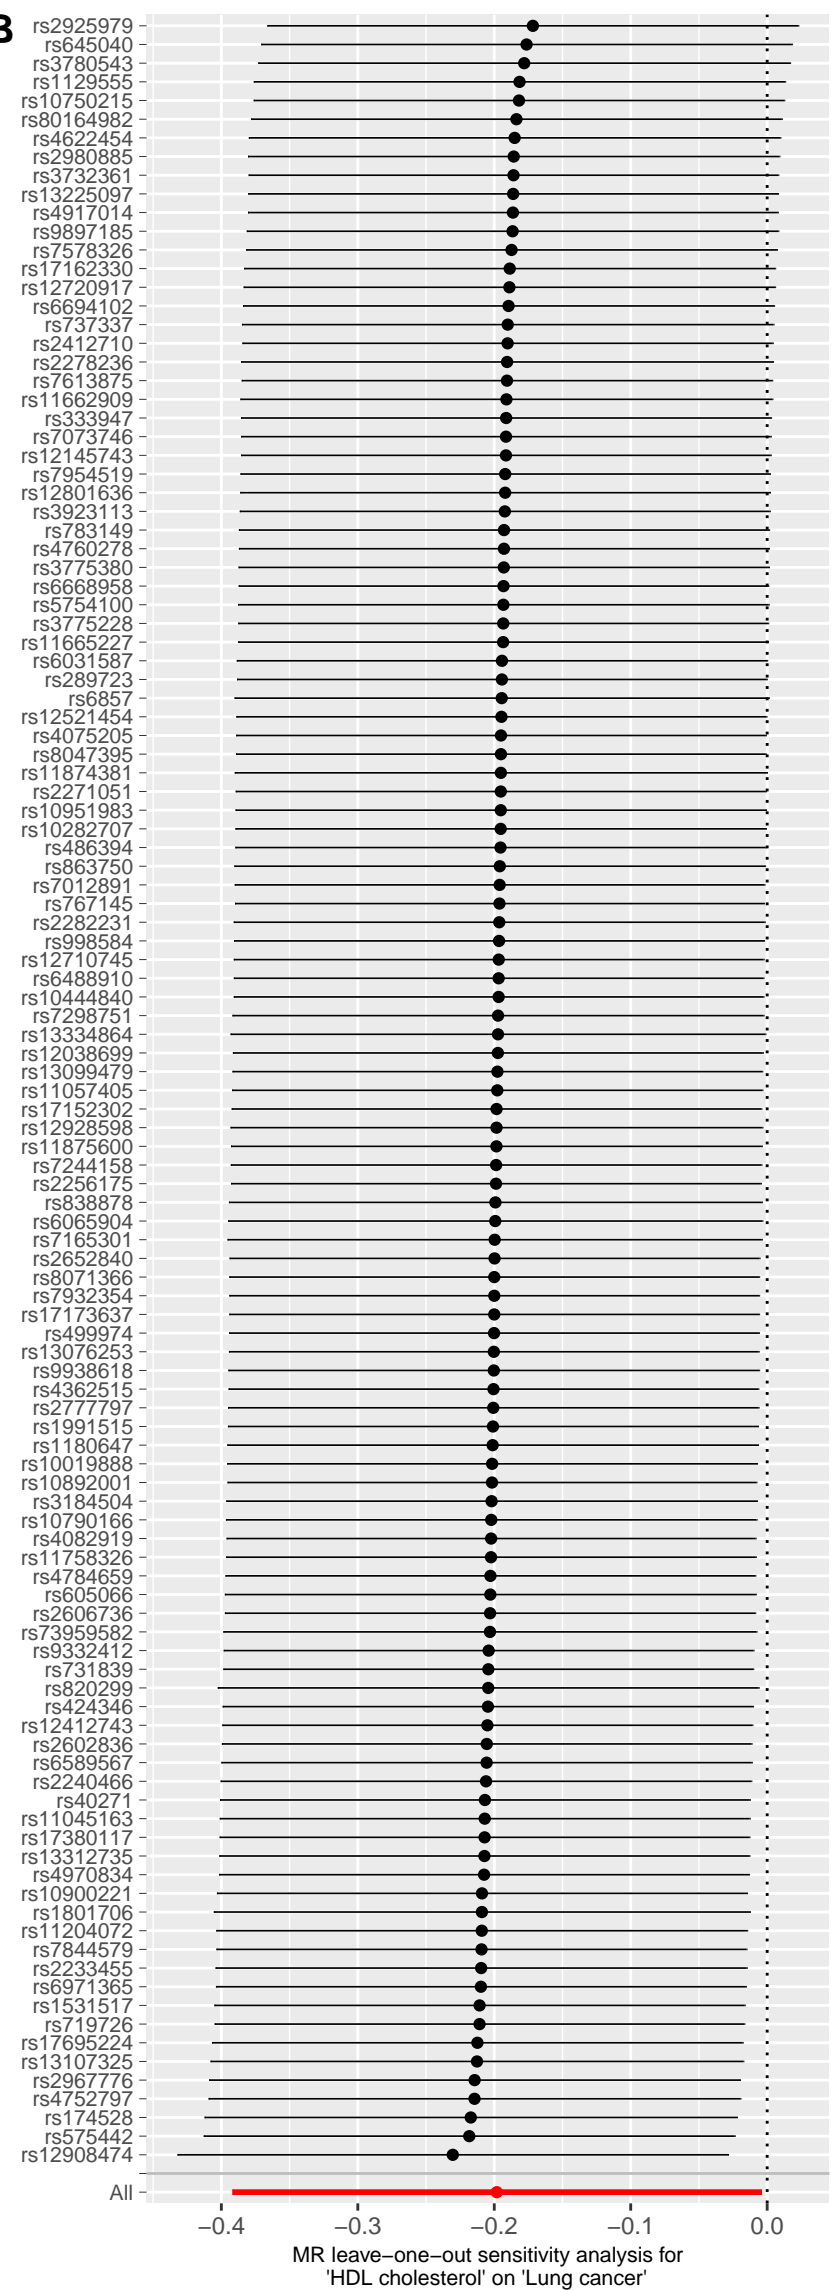

Supplement: pone.0258498.s007.pdf [file pone.0258498.s007.pdf]
