# Supplementary material for: Identifying modifiable risk factors of lung cancer: Indications from Mendelian randomization
Source: PubMed Central journal article supplement (PMC8523078; doi:10.1371/journal.pone.0258498), 2021-10-18
Supplement: pone.0258498.s015.pdf [file pone.0258498.s015.pdf]

**S2 Table: Instrumental variables of smoking initiation.** SNP is the rsID of genetic variants; A1 is the effect allele; A2 is the other allele; beta is the effect size of A1 on the exposure; se is the standard error of beta; pval is the p value of beta; F is the F statistics.

| SNP         | A1 | A2 | beta   | se    | pval     | F     |
|-------------|----|----|--------|-------|----------|-------|
| rs1004787   | G  | A  | -0.034 | 0.004 | 6.90E-22 | 92.45 |
| rs10211770  | T  | C  | 0.021  | 0.004 | 5.20E-09 | 34.11 |
| rs10233018  | A  | G  | -0.028 | 0.003 | 4.60E-16 | 65.96 |
| rs1029984   | G  | T  | -0.020 | 0.004 | 1.20E-08 | 32.49 |
| rs10446671  | T  | C  | 0.021  | 0.004 | 3.10E-09 | 35.12 |
| rs10493500  | G  | A  | -0.026 | 0.004 | 3.70E-09 | 34.78 |
| rs11012750  | G  | A  | 0.024  | 0.004 | 7.50E-11 | 42.38 |
| rs11057005  | G  | A  | -0.020 | 0.004 | 2.10E-08 | 31.40 |
| rs11125335  | C  | T  | 0.024  | 0.004 | 1.10E-11 | 46.14 |
| rs11165531  | G  | T  | -0.020 | 0.003 | 4.70E-09 | 34.31 |
| rs11191487  | G  | A  | 0.039  | 0.005 | 6.10E-16 | 65.40 |
| rs113617088 | A  | G  | 0.030  | 0.005 | 3.30E-08 | 30.52 |
| rs11594623  | C  | T  | 0.026  | 0.004 | 1.70E-10 | 40.78 |
| rs11611651  | A  | G  | 0.036  | 0.006 | 1.00E-08 | 32.84 |
| rs11716779  | G  | A  | 0.022  | 0.004 | 2.80E-08 | 30.84 |
| rs11720703  | T  | C  | 0.020  | 0.004 | 1.20E-08 | 32.49 |
| rs11768481  | A  | C  | -0.026 | 0.004 | 3.00E-12 | 48.69 |
| rs12027999  | C  | T  | -0.030 | 0.005 | 1.30E-08 | 32.33 |
| rs12186738  | T  | G  | -0.028 | 0.005 | 1.40E-08 | 32.19 |
| rs12202507  | C  | T  | 0.021  | 0.004 | 8.50E-09 | 33.16 |
| rs12474587  | T  | G  | 0.025  | 0.004 | 1.10E-12 | 50.66 |
| rs12530388  | A  | C  | 0.019  | 0.003 | 3.40E-08 | 30.46 |
| rs12545053  | G  | A  | 0.022  | 0.004 | 4.20E-10 | 39.02 |
| rs12632110  | A  | G  | 0.024  | 0.004 | 1.20E-10 | 41.47 |
| rs12708665  | A  | G  | -0.022 | 0.004 | 1.10E-08 | 32.66 |
| rs1385108   | T  | C  | 0.025  | 0.004 | 2.20E-09 | 35.79 |
| rs1392510   | C  | T  | 0.028  | 0.005 | 3.10E-08 | 30.64 |
| rs1518393   | A  | C  | -0.020 | 0.004 | 3.80E-08 | 30.25 |
| rs17055603  | A  | G  | -0.021 | 0.004 | 3.80E-08 | 30.25 |
| rs1901477   | A  | G  | -0.029 | 0.004 | 1.20E-15 | 64.07 |
| rs1945735   | G  | A  | -0.023 | 0.004 | 1.40E-08 | 32.19 |
| rs2218439   | A  | G  | 0.024  | 0.003 | 5.80E-12 | 47.40 |
| rs2237235   | G  | A  | -0.023 | 0.004 | 5.00E-08 | 29.72 |
| rs2378662   | G  | A  | -0.020 | 0.003 | 9.10E-09 | 33.02 |
| rs238896    | A  | G  | -0.020 | 0.004 | 1.70E-08 | 31.81 |
| rs2398737   | G  | T  | -0.024 | 0.003 | 2.90E-12 | 48.76 |
| rs2435211   | T  | C  | 0.022  | 0.004 | 4.40E-09 | 34.44 |
| rs2585817   | G  | A  | -0.021 | 0.004 | 5.20E-09 | 34.11 |
| rs2652430   | A  | G  | -0.022 | 0.004 | 4.10E-10 | 39.06 |

|            |   |   |        |       |          |        |
|------------|---|---|--------|-------|----------|--------|
| rs2710331  | C | T | 0.022  | 0.004 | 3.00E-09 | 35.18  |
| rs281287   | G | A | 0.028  | 0.004 | 3.80E-14 | 57.27  |
| rs28717373 | T | C | -0.026 | 0.004 | 3.00E-13 | 53.21  |
| rs3001723  | A | G | 0.032  | 0.004 | 1.60E-16 | 68.04  |
| rs301805   | T | G | -0.021 | 0.004 | 2.80E-09 | 35.32  |
| rs34121288 | T | C | 0.020  | 0.004 | 4.90E-08 | 29.76  |
| rs34626694 | T | C | 0.021  | 0.004 | 2.50E-08 | 31.06  |
| rs36096261 | A | G | 0.031  | 0.005 | 6.30E-09 | 33.74  |
| rs3741499  | T | C | -0.021 | 0.004 | 2.00E-08 | 31.49  |
| rs3843409  | T | C | 0.020  | 0.004 | 2.10E-08 | 31.40  |
| rs4044321  | A | G | 0.029  | 0.004 | 2.20E-15 | 62.88  |
| rs4255357  | G | A | -0.023 | 0.004 | 5.90E-11 | 42.85  |
| rs4523689  | G | A | -0.021 | 0.004 | 8.90E-09 | 33.07  |
| rs4543592  | C | T | 0.019  | 0.003 | 2.40E-08 | 31.14  |
| rs455650   | C | T | 0.039  | 0.004 | 4.10E-18 | 75.27  |
| rs4571506  | T | C | -0.023 | 0.004 | 8.80E-11 | 42.07  |
| rs6119893  | T | G | 0.024  | 0.004 | 1.20E-10 | 41.47  |
| rs61959481 | A | G | -0.024 | 0.004 | 3.10E-08 | 30.64  |
| rs62025923 | C | T | -0.028 | 0.004 | 6.00E-11 | 42.82  |
| rs6265     | T | C | -0.034 | 0.004 | 1.30E-14 | 59.38  |
| rs6438208  | A | G | -0.025 | 0.004 | 2.90E-10 | 39.74  |
| rs6499255  | G | A | 0.027  | 0.005 | 4.70E-09 | 34.31  |
| rs6728726  | T | C | -0.033 | 0.005 | 6.00E-13 | 51.85  |
| rs6756212  | C | T | 0.039  | 0.003 | 2.90E-29 | 126.12 |
| rs6948707  | G | T | 0.024  | 0.004 | 2.10E-11 | 44.88  |
| rs7005565  | C | T | 0.024  | 0.004 | 1.50E-09 | 36.53  |
| rs7083526  | C | T | -0.025 | 0.003 | 9.10E-13 | 51.03  |
| rs7110863  | G | A | 0.044  | 0.004 | 1.60E-35 | 154.73 |
| rs7197072  | T | C | -0.024 | 0.004 | 7.10E-09 | 33.51  |
| rs748832   | G | A | 0.021  | 0.004 | 1.20E-08 | 32.49  |
| rs7505855  | C | T | 0.020  | 0.003 | 8.90E-09 | 33.07  |
| rs7553158  | G | A | 0.021  | 0.004 | 5.40E-09 | 34.04  |
| rs77464064 | T | C | 0.041  | 0.007 | 5.60E-09 | 33.97  |
| rs7787612  | T | C | -0.023 | 0.004 | 6.60E-09 | 33.65  |
| rs7829715  | T | C | 0.025  | 0.003 | 5.70E-13 | 51.95  |
| rs7901883  | A | G | -0.026 | 0.004 | 2.10E-10 | 40.37  |
| rs7969559  | A | G | 0.025  | 0.004 | 1.60E-10 | 40.90  |
| rs7993498  | T | C | -0.022 | 0.004 | 4.70E-10 | 38.80  |
| rs9375328  | C | T | 0.027  | 0.004 | 1.30E-11 | 45.81  |
| rs9517908  | G | A | 0.025  | 0.004 | 4.30E-09 | 34.48  |
| rs9540731  | C | T | 0.021  | 0.004 | 4.00E-09 | 34.62  |
| rs9922607  | T | C | -0.024 | 0.004 | 4.60E-08 | 29.88  |
| rs993700   | T | C | 0.026  | 0.004 | 4.20E-10 | 39.02  |

---
