# Supplementary material for: Identifying modifiable risk factors of lung cancer: Indications from Mendelian randomization
Source: PubMed Central journal article supplement (PMC8523078; doi:10.1371/journal.pone.0258498), 2021-10-18
Supplement: pone.0258498.s016.pdf [file pone.0258498.s016.pdf]

**S3 Table: Instrumental variables of smoking cessation.** SNP is the rsID of genetic variants; A1 is the effect allele; A2 is the other allele; beta is the effect size of A1 on the exposure; se is the standard error of beta; pval is the p value of beta; F is the F statistics.

| <b>SNP</b>  | <b>A1</b> | <b>A2</b> | <b>beta</b> | <b>se</b> | <b>pval</b> | <b>F</b> |
|-------------|-----------|-----------|-------------|-----------|-------------|----------|
| rs11090045  | G         | A         | 0.029       | 0.005     | 9.90E-09    | 32.86    |
| rs113382419 | C         | A         | -0.081      | 0.007     | 1.00E-27    | 119.09   |
| rs12891477  | C         | T         | -0.029      | 0.005     | 1.60E-09    | 36.41    |
| rs215599    | T         | C         | -0.026      | 0.005     | 3.60E-08    | 30.35    |
| rs329120    | C         | T         | 0.026       | 0.005     | 3.40E-08    | 30.46    |
| rs4955411   | G         | A         | -0.036      | 0.006     | 1.30E-10    | 41.31    |
| rs6011779   | T         | C         | -0.056      | 0.006     | 2.40E-21    | 89.98    |
| rs61902812  | C         | A         | 0.055       | 0.010     | 1.90E-08    | 31.59    |
| rs62262671  | A         | G         | -0.037      | 0.007     | 4.10E-08    | 30.10    |
| rs637473    | T         | C         | 0.030       | 0.005     | 3.60E-09    | 34.83    |
| rs7932056   | G         | A         | -0.032      | 0.005     | 1.00E-09    | 37.32    |
