# Supplementary material for: Identifying modifiable risk factors of lung cancer: Indications from Mendelian randomization
Source: PubMed Central journal article supplement (PMC8523078; doi:10.1371/journal.pone.0258498), 2021-10-18
Supplement: pone.0258498.s017.pdf [file pone.0258498.s017.pdf]

**S4 Table: Instrumental variables of cigarettes per day.** SNP is the rsID of genetic variants; A1 is the effect allele; A2 is the other allele; beta is the effect size of A1 on the exposure; se is the standard error of beta; pval is the p value of beta; F is the F statistics.

| SNP         | A1 | A2 | beta   | se    | pval      | F      |
|-------------|----|----|--------|-------|-----------|--------|
| rs10092346  | C  | T  | -0.029 | 0.005 | 6.86E-10  | 38.06  |
| rs10419393  | G  | A  | 0.034  | 0.006 | 1.96E-08  | 31.54  |
| rs1051730   | A  | G  | 0.095  | 0.004 | 5.51E-121 | 547.05 |
| rs1052035   | C  | T  | 0.066  | 0.009 | 2.06E-13  | 53.95  |
| rs11072806  | A  | G  | 0.050  | 0.004 | 9.11E-38  | 165.01 |
| rs111280114 | G  | A  | 0.038  | 0.007 | 7.87E-09  | 33.31  |
| rs111684981 | G  | A  | -0.128 | 0.019 | 2.61E-11  | 44.45  |
| rs112889062 | T  | C  | -0.131 | 0.020 | 1.97E-11  | 45.00  |
| rs113864525 | A  | C  | 0.039  | 0.006 | 4.18E-11  | 43.53  |
| rs11638490  | T  | C  | 0.058  | 0.004 | 3.20E-50  | 222.07 |
| rs11670760  | C  | T  | 0.051  | 0.007 | 2.17E-14  | 58.37  |
| rs117189732 | T  | C  | 0.042  | 0.006 | 1.25E-10  | 41.38  |
| rs117248593 | T  | C  | -0.130 | 0.020 | 3.67E-11  | 43.78  |
| rs117287096 | A  | G  | -0.154 | 0.022 | 1.83E-12  | 49.66  |
| rs117422348 | T  | C  | -0.147 | 0.021 | 8.14E-13  | 51.25  |
| rs117540499 | A  | G  | -0.160 | 0.021 | 7.49E-14  | 55.94  |
| rs117947334 | T  | C  | -0.129 | 0.019 | 1.69E-11  | 45.31  |
| rs11858836  | A  | G  | 0.084  | 0.004 | 9.04E-96  | 431.17 |
| rs12593207  | A  | G  | -0.051 | 0.007 | 3.60E-14  | 57.38  |
| rs12904234  | T  | C  | 0.055  | 0.005 | 2.46E-26  | 112.74 |
| rs12905641  | T  | C  | -0.028 | 0.004 | 3.51E-12  | 48.38  |
| rs12914385  | T  | C  | 0.086  | 0.004 | 3.44E-105 | 474.45 |
| rs1316971   | G  | A  | 0.072  | 0.005 | 1.36E-48  | 214.60 |
| rs1317286   | G  | A  | 0.094  | 0.004 | 4.39E-118 | 533.72 |
| rs13180     | T  | C  | 0.058  | 0.004 | 5.65E-48  | 211.77 |
| rs1394371   | T  | C  | 0.074  | 0.004 | 1.64E-67  | 301.39 |
| rs1451240   | G  | A  | 0.034  | 0.005 | 6.47E-14  | 56.22  |
| rs16969968  | A  | G  | 0.096  | 0.003 | 7.58E-185 | 840.72 |
| rs17486278  | C  | A  | 0.094  | 0.004 | 8.32E-117 | 527.84 |
| rs1994016   | T  | C  | 0.045  | 0.003 | 2.25E-43  | 190.69 |
| rs1996371   | C  | T  | 0.059  | 0.004 | 5.22E-51  | 225.68 |
| rs3025343   | A  | G  | 0.038  | 0.005 | 1.13E-14  | 59.66  |
| rs34406232  | A  | C  | -0.121 | 0.019 | 1.51E-10  | 41.01  |
| rs3825807   | G  | A  | 0.048  | 0.003 | 6.26E-48  | 211.56 |
| rs3885951   | G  | A  | 0.066  | 0.007 | 8.35E-23  | 96.63  |
| rs4380028   | T  | C  | 0.030  | 0.004 | 6.55E-13  | 51.68  |
| rs4398905   | T  | C  | -0.034 | 0.006 | 6.78E-09  | 33.60  |
| rs4436747   | G  | A  | -0.026 | 0.004 | 9.30E-12  | 46.47  |
| rs4803365   | A  | G  | -0.130 | 0.020 | 3.47E-11  | 43.89  |

|            |   |   |        |       |           |        |
|------------|---|---|--------|-------|-----------|--------|
| rs4803367  | G | T | -0.129 | 0.020 | 5.58E-11  | 42.96  |
| rs4803400  | G | T | 0.033  | 0.006 | 2.31E-08  | 31.21  |
| rs55853698 | G | T | 0.095  | 0.004 | 4.40E-121 | 547.50 |
| rs56057809 | T | C | 0.039  | 0.006 | 7.97E-11  | 42.27  |
| rs569207   | T | C | -0.080 | 0.005 | 2.18E-65  | 291.64 |
| rs578776   | A | G | -0.072 | 0.004 | 5.28E-64  | 285.29 |
| rs6474412  | T | C | 0.035  | 0.004 | 2.15E-21  | 90.21  |
| rs6495307  | T | C | -0.028 | 0.004 | 1.11E-12  | 50.64  |
| rs6495308  | C | T | -0.081 | 0.005 | 9.82E-69  | 307.00 |
| rs6495309  | T | C | -0.083 | 0.005 | 1.00E-59  | 265.66 |
| rs667282   | C | T | -0.079 | 0.005 | 6.74E-65  | 289.39 |
| rs680244   | C | T | 0.031  | 0.004 | 8.87E-16  | 64.67  |
| rs7247903  | G | A | -0.074 | 0.008 | 1.62E-19  | 81.66  |
| rs7251418  | G | A | 0.051  | 0.007 | 1.87E-14  | 58.67  |
| rs72740964 | A | G | 0.094  | 0.004 | 2.67E-117 | 530.11 |
| rs73034462 | A | G | 0.037  | 0.006 | 2.09E-09  | 35.89  |
| rs739447   | T | C | 0.039  | 0.006 | 4.47E-11  | 43.40  |
| rs75106522 | A | G | 0.054  | 0.009 | 3.42E-09  | 34.93  |
| rs79016062 | T | G | -0.132 | 0.020 | 1.86E-11  | 45.12  |
| rs7937     | T | C | 0.042  | 0.006 | 1.32E-12  | 50.30  |
| rs80208490 | G | A | -0.130 | 0.020 | 3.18E-11  | 44.06  |
| rs8034191  | C | T | 0.095  | 0.003 | 8.62E-183 | 831.26 |
| rs8040868  | C | T | 0.085  | 0.004 | 7.96E-103 | 463.59 |
| rs8042374  | G | A | -0.082 | 0.006 | 1.21E-39  | 173.60 |
| rs8043119  | A | G | 0.054  | 0.004 | 2.23E-43  | 190.71 |
| rs8053     | C | T | 0.034  | 0.004 | 3.16E-18  | 75.78  |
| rs938682   | A | G | 0.082  | 0.004 | 2.24E-107 | 484.50 |
| rs951266   | A | G | 0.094  | 0.004 | 1.58E-117 | 531.16 |

---
