# Supplementary material for: Identifying modifiable risk factors of lung cancer: Indications from Mendelian randomization
Source: PubMed Central journal article supplement (PMC8523078; doi:10.1371/journal.pone.0258498), 2021-10-18
Supplement: pone.0258498.s018.pdf [file pone.0258498.s018.pdf]

**S5 Table: Instrumental variables of BMI.** SNP is the rsID of genetic variants; A1 is the effect allele; A2 is the other allele; beta is the effect size of A1 on the exposure; se is the standard error of beta; pval is the p value of beta; F is the F statistics.

| SNP        | A1 | A2 | beta  | se    | pval     | F      |
|------------|----|----|-------|-------|----------|--------|
| rs1000940  | G  | A  | 0.019 | 0.003 | 1.28E-08 | 40.11  |
| rs10132280 | C  | A  | 0.023 | 0.003 | 1.14E-11 | 58.78  |
| rs1016287  | T  | C  | 0.023 | 0.003 | 2.25E-11 | 58.78  |
| rs10182181 | G  | A  | 0.031 | 0.003 | 8.78E-24 | 106.78 |
| rs10938397 | G  | A  | 0.040 | 0.003 | 3.21E-38 | 177.78 |
| rs10968576 | G  | A  | 0.025 | 0.003 | 6.61E-14 | 69.44  |
| rs11030104 | A  | G  | 0.041 | 0.004 | 5.56E-28 | 105.06 |
| rs11057405 | G  | A  | 0.031 | 0.006 | 2.02E-08 | 26.69  |
| rs11126666 | A  | G  | 0.021 | 0.003 | 1.33E-09 | 49.00  |
| rs11165643 | T  | C  | 0.022 | 0.003 | 2.07E-12 | 53.78  |
| rs11191560 | C  | T  | 0.031 | 0.005 | 8.45E-09 | 38.44  |
| rs11583200 | C  | T  | 0.018 | 0.003 | 1.48E-08 | 36.00  |
| rs1167827  | G  | A  | 0.020 | 0.003 | 6.33E-10 | 44.44  |
| rs11688816 | G  | A  | 0.017 | 0.003 | 1.89E-08 | 32.11  |
| rs11727676 | T  | C  | 0.036 | 0.006 | 2.55E-08 | 36.00  |
| rs11847697 | T  | C  | 0.049 | 0.008 | 3.99E-09 | 37.52  |
| rs12286929 | G  | A  | 0.022 | 0.003 | 1.31E-12 | 53.78  |
| rs12401738 | A  | G  | 0.021 | 0.003 | 1.15E-10 | 49.00  |
| rs12429545 | A  | G  | 0.033 | 0.005 | 1.09E-12 | 43.56  |
| rs12446632 | G  | A  | 0.040 | 0.005 | 1.48E-18 | 64.00  |
| rs12566985 | G  | A  | 0.024 | 0.003 | 3.28E-15 | 64.00  |
| rs12885454 | C  | A  | 0.021 | 0.003 | 1.94E-10 | 49.00  |
| rs12940622 | G  | A  | 0.018 | 0.003 | 2.49E-09 | 36.00  |
| rs13021737 | G  | A  | 0.060 | 0.004 | 1.11E-50 | 225.00 |
| rs13078960 | G  | T  | 0.030 | 0.004 | 1.74E-14 | 56.25  |
| rs13107325 | T  | C  | 0.048 | 0.007 | 1.83E-12 | 47.02  |
| rs13191362 | A  | G  | 0.028 | 0.005 | 7.34E-09 | 31.36  |
| rs13201877 | G  | A  | 0.023 | 0.005 | 4.29E-08 | 21.16  |
| rs1441264  | A  | G  | 0.018 | 0.003 | 2.96E-08 | 36.00  |
| rs1460676  | C  | T  | 0.020 | 0.004 | 4.98E-08 | 25.00  |
| rs1516725  | C  | T  | 0.045 | 0.005 | 1.89E-22 | 81.00  |
| rs1528435  | T  | C  | 0.018 | 0.003 | 1.20E-08 | 36.00  |
| rs16851483 | T  | G  | 0.048 | 0.008 | 3.55E-10 | 36.00  |
| rs16907751 | C  | T  | 0.035 | 0.007 | 3.89E-08 | 25.00  |
| rs16951275 | T  | C  | 0.031 | 0.004 | 1.91E-17 | 60.06  |
| rs17024393 | C  | T  | 0.066 | 0.009 | 7.03E-14 | 53.78  |
| rs17094222 | C  | T  | 0.025 | 0.004 | 5.94E-11 | 39.06  |
| rs17203016 | G  | A  | 0.021 | 0.004 | 3.41E-08 | 27.56  |
| rs17405819 | T  | C  | 0.022 | 0.003 | 2.07E-11 | 53.78  |

|            |   |   |       |       |          |        |
|------------|---|---|-------|-------|----------|--------|
| rs17724992 | A | G | 0.019 | 0.004 | 3.42E-08 | 22.56  |
| rs1808579  | C | T | 0.017 | 0.003 | 4.17E-08 | 32.11  |
| rs1928295  | T | C | 0.019 | 0.003 | 7.91E-10 | 40.11  |
| rs2033529  | G | A | 0.019 | 0.003 | 1.39E-08 | 40.11  |
| rs2033732  | C | T | 0.019 | 0.004 | 4.89E-08 | 22.56  |
| rs205262   | G | A | 0.022 | 0.004 | 1.75E-10 | 30.25  |
| rs2075650  | A | G | 0.026 | 0.005 | 1.25E-08 | 27.04  |
| rs2080454  | C | A | 0.017 | 0.003 | 8.60E-09 | 32.11  |
| rs2112347  | T | G | 0.026 | 0.003 | 6.19E-17 | 75.11  |
| rs2121279  | T | C | 0.025 | 0.004 | 2.31E-08 | 39.06  |
| rs2176040  | A | G | 0.014 | 0.003 | 9.99E-09 | 21.78  |
| rs2176598  | T | C | 0.020 | 0.004 | 2.97E-08 | 25.00  |
| rs2207139  | G | A | 0.045 | 0.004 | 4.13E-29 | 126.56 |
| rs2245368  | C | T | 0.032 | 0.006 | 3.19E-08 | 28.44  |
| rs2287019  | C | T | 0.036 | 0.004 | 4.59E-18 | 81.00  |
| rs2365389  | C | T | 0.020 | 0.003 | 1.63E-10 | 44.44  |
| rs2650492  | A | G | 0.021 | 0.004 | 1.92E-09 | 27.56  |
| rs2820292  | C | A | 0.020 | 0.003 | 1.83E-10 | 44.44  |
| rs2836754  | C | T | 0.016 | 0.003 | 1.61E-08 | 28.44  |
| rs29941    | G | A | 0.018 | 0.003 | 2.41E-08 | 36.00  |
| rs3101336  | C | T | 0.033 | 0.003 | 2.66E-26 | 121.00 |
| rs3736485  | A | G | 0.018 | 0.003 | 7.41E-09 | 36.00  |
| rs3810291  | A | G | 0.028 | 0.004 | 4.81E-15 | 49.00  |
| rs3817334  | T | C | 0.026 | 0.003 | 5.15E-17 | 75.11  |
| rs3849570  | A | C | 0.019 | 0.003 | 2.60E-08 | 40.11  |
| rs3888190  | A | C | 0.031 | 0.003 | 3.14E-23 | 106.78 |
| rs4740619  | T | C | 0.018 | 0.003 | 4.56E-09 | 36.00  |
| rs4787491  | G | A | 0.016 | 0.003 | 2.70E-08 | 28.44  |
| rs492400   | C | T | 0.016 | 0.003 | 6.78E-09 | 28.44  |
| rs543874   | G | A | 0.048 | 0.004 | 2.62E-35 | 144.00 |
| rs6091540  | C | T | 0.019 | 0.004 | 2.15E-11 | 22.56  |
| rs6465468  | T | G | 0.017 | 0.004 | 4.98E-08 | 18.06  |
| rs6477694  | C | T | 0.017 | 0.003 | 2.67E-08 | 32.11  |
| rs6567160  | C | T | 0.056 | 0.004 | 3.93E-53 | 196.00 |
| rs657452   | A | G | 0.023 | 0.003 | 5.48E-13 | 58.78  |
| rs6804842  | G | A | 0.019 | 0.003 | 2.48E-09 | 40.11  |
| rs7138803  | A | G | 0.032 | 0.003 | 8.15E-24 | 113.78 |
| rs7141420  | T | C | 0.024 | 0.003 | 1.23E-14 | 64.00  |
| rs7164727  | T | C | 0.018 | 0.003 | 3.92E-09 | 36.00  |
| rs7239883  | G | A | 0.016 | 0.003 | 1.51E-08 | 28.44  |
| rs7243357  | T | G | 0.022 | 0.004 | 3.86E-08 | 30.25  |
| rs758747   | T | C | 0.023 | 0.004 | 7.47E-10 | 33.06  |
| rs7599312  | G | A | 0.022 | 0.003 | 1.17E-10 | 53.78  |
| rs7715256  | G | T | 0.016 | 0.003 | 8.85E-09 | 28.44  |

|           |   |   |       |       |          |       |
|-----------|---|---|-------|-------|----------|-------|
| rs7899106 | G | A | 0.040 | 0.007 | 2.96E-08 | 32.65 |
| rs7903146 | C | T | 0.023 | 0.003 | 1.11E-11 | 58.78 |
| rs9374842 | T | C | 0.019 | 0.004 | 2.67E-08 | 22.56 |
| rs9400239 | C | T | 0.019 | 0.003 | 1.61E-08 | 40.11 |
| rs9540493 | A | G | 0.017 | 0.003 | 4.97E-08 | 32.11 |
| rs977747  | T | G | 0.017 | 0.003 | 2.18E-08 | 32.11 |
| rs9925964 | A | G | 0.019 | 0.003 | 8.11E-10 | 40.11 |

---
