# Supplementary material for: Identifying modifiable risk factors of lung cancer: Indications from Mendelian randomization
Source: PubMed Central journal article supplement (PMC8523078; doi:10.1371/journal.pone.0258498), 2021-10-18
Supplement: pone.0258498.s019.pdf [file pone.0258498.s019.pdf]

**S6 Table: Instrumental variables of hip circumference.** SNP is the rsID of genetic variants; A1 is the effect allele; A2 is the other allele; beta is the effect size of A1 on the exposure; se is the standard error of beta; pval is the p value of beta; F is the F statistics.

| SNP        | A1 | A2 | beta   | se    | pval     | F      |
|------------|----|----|--------|-------|----------|--------|
| rs10132280 | A  | C  | -0.022 | 0.004 | 4.80E-09 | 33.52  |
| rs10929925 | C  | A  | 0.019  | 0.004 | 4.50E-08 | 27.85  |
| rs10938397 | A  | G  | -0.030 | 0.004 | 9.30E-17 | 65.74  |
| rs11057405 | A  | G  | -0.040 | 0.006 | 2.10E-10 | 40.31  |
| rs11165623 | A  | G  | 0.022  | 0.004 | 3.00E-10 | 39.51  |
| rs11672660 | C  | T  | 0.028  | 0.005 | 7.10E-10 | 38.72  |
| rs11676272 | G  | A  | 0.026  | 0.004 | 3.80E-11 | 44.44  |
| rs12086130 | T  | C  | 0.038  | 0.006 | 2.60E-09 | 36.38  |
| rs12446632 | A  | G  | -0.036 | 0.005 | 1.10E-11 | 47.93  |
| rs1294409  | T  | C  | -0.020 | 0.004 | 3.00E-08 | 29.22  |
| rs13098327 | G  | A  | -0.027 | 0.004 | 1.20E-09 | 37.65  |
| rs1351394  | T  | C  | 0.023  | 0.004 | 6.40E-11 | 43.18  |
| rs13695    | C  | T  | -0.024 | 0.004 | 4.30E-08 | 29.75  |
| rs143384   | A  | G  | -0.026 | 0.004 | 3.90E-12 | 46.81  |
| rs1516725  | T  | C  | -0.031 | 0.005 | 1.00E-08 | 32.96  |
| rs1548457  | T  | C  | -0.025 | 0.005 | 1.70E-08 | 30.86  |
| rs16894959 | C  | T  | 0.037  | 0.005 | 9.60E-14 | 57.02  |
| rs16905212 | C  | T  | -0.021 | 0.004 | 1.90E-08 | 30.54  |
| rs17024393 | C  | T  | 0.063  | 0.010 | 2.80E-10 | 39.69  |
| rs17066842 | G  | A  | 0.059  | 0.010 | 1.70E-09 | 37.00  |
| rs17391694 | T  | C  | 0.039  | 0.006 | 3.00E-10 | 40.88  |
| rs1808579  | T  | C  | -0.023 | 0.004 | 2.10E-10 | 43.18  |
| rs2112347  | G  | T  | -0.025 | 0.004 | 9.70E-12 | 48.23  |
| rs2206277  | T  | C  | 0.039  | 0.005 | 3.10E-17 | 71.88  |
| rs2293576  | A  | G  | -0.023 | 0.004 | 2.10E-09 | 36.63  |
| rs2301573  | T  | C  | -0.035 | 0.006 | 2.10E-08 | 31.87  |
| rs2820443  | C  | T  | 0.034  | 0.004 | 4.90E-18 | 76.00  |
| rs3087591  | A  | G  | -0.021 | 0.004 | 2.50E-08 | 30.54  |
| rs355838   | T  | G  | -0.022 | 0.004 | 1.60E-09 | 37.35  |
| rs3800229  | T  | G  | 0.021  | 0.004 | 3.20E-08 | 30.54  |
| rs3810291  | A  | G  | 0.023  | 0.004 | 2.40E-08 | 31.47  |
| rs3888190  | A  | C  | 0.035  | 0.004 | 9.40E-22 | 94.52  |
| rs4132228  | C  | T  | -0.021 | 0.004 | 3.10E-08 | 28.99  |
| rs4883723  | G  | A  | -0.032 | 0.005 | 5.20E-10 | 39.37  |
| rs4889606  | G  | A  | -0.021 | 0.004 | 8.80E-09 | 34.03  |
| rs543874   | G  | A  | 0.045  | 0.005 | 1.80E-23 | 100.00 |
| rs6163     | C  | A  | -0.021 | 0.004 | 1.60E-08 | 32.21  |
| rs6265     | C  | T  | 0.034  | 0.005 | 1.50E-14 | 57.09  |
| rs6569648  | T  | C  | -0.029 | 0.004 | 6.50E-12 | 47.68  |

|           |   |   |        |       |          |        |
|-----------|---|---|--------|-------|----------|--------|
| rs663129  | A | G | 0.050  | 0.004 | 1.40E-32 | 141.72 |
| rs6755502 | T | C | -0.054 | 0.005 | 2.40E-30 | 132.01 |
| rs7138803 | G | A | -0.029 | 0.004 | 1.90E-15 | 61.43  |
| rs7144011 | T | G | 0.030  | 0.004 | 8.60E-13 | 51.02  |
| rs7183263 | G | T | 0.019  | 0.004 | 4.80E-08 | 27.85  |
| rs7531118 | T | C | -0.024 | 0.004 | 4.00E-11 | 42.07  |
| rs7632381 | T | C | -0.036 | 0.004 | 5.30E-24 | 105.80 |
| rs7903146 | T | C | -0.026 | 0.004 | 2.10E-11 | 44.44  |
| rs798528  | A | C | 0.021  | 0.004 | 1.70E-08 | 30.54  |
| rs806794  | G | A | -0.032 | 0.004 | 2.80E-16 | 64.00  |
| rs879620  | C | T | -0.029 | 0.005 | 8.90E-10 | 38.07  |
| rs887912  | T | C | 0.022  | 0.004 | 1.60E-08 | 31.82  |
| rs951252  | G | A | -0.028 | 0.004 | 4.50E-15 | 64.00  |
| rs9939973 | A | G | 0.070  | 0.004 | 2.30E-86 | 378.09 |

---
