# Supplementary material for: Identifying modifiable risk factors of lung cancer: Indications from Mendelian randomization
Source: PubMed Central journal article supplement (PMC8523078; doi:10.1371/journal.pone.0258498), 2021-10-18
Supplement: pone.0258498.s020.pdf [file pone.0258498.s020.pdf]

**S7 Table: Instrumental variables of waist circumference.** SNP is the rsID of genetic variants; A1 is the effect allele; A2 is the other allele; beta is the effect size of A1 on the exposure; se is the standard error of beta; pval is the p value of beta; F is the F statistics.

| SNP        | A1 | A2 | beta   | se    | pval     | F      |
|------------|----|----|--------|-------|----------|--------|
| rs10132280 | A  | C  | -0.022 | 0.004 | 2.20E-09 | 35.35  |
| rs10840100 | G  | A  | 0.020  | 0.004 | 5.40E-09 | 32.65  |
| rs10938397 | A  | G  | -0.032 | 0.004 | 6.10E-20 | 83.59  |
| rs10968576 | G  | A  | 0.025  | 0.004 | 1.20E-11 | 48.23  |
| rs11165623 | A  | G  | 0.020  | 0.003 | 5.20E-09 | 34.60  |
| rs11873305 | A  | C  | 0.058  | 0.009 | 3.10E-10 | 39.74  |
| rs12429545 | G  | A  | -0.031 | 0.005 | 2.50E-09 | 35.54  |
| rs12446632 | A  | G  | -0.036 | 0.005 | 5.20E-13 | 51.84  |
| rs12885454 | C  | A  | 0.020  | 0.004 | 2.60E-08 | 32.65  |
| rs1516725  | T  | C  | -0.031 | 0.005 | 1.70E-09 | 36.95  |
| rs1549293  | T  | C  | -0.020 | 0.004 | 7.30E-09 | 32.65  |
| rs16894959 | C  | T  | 0.026  | 0.005 | 3.40E-08 | 29.34  |
| rs16996700 | T  | C  | 0.023  | 0.004 | 1.50E-09 | 38.64  |
| rs2075650  | A  | G  | 0.031  | 0.005 | 8.90E-10 | 38.44  |
| rs2112347  | G  | T  | -0.025 | 0.004 | 3.20E-13 | 51.02  |
| rs2287019  | C  | T  | 0.035  | 0.005 | 1.70E-14 | 57.89  |
| rs2293576  | A  | G  | -0.022 | 0.004 | 9.40E-10 | 37.35  |
| rs2325036  | A  | C  | 0.023  | 0.004 | 2.10E-11 | 43.18  |
| rs2489623  | C  | A  | 0.019  | 0.003 | 3.40E-08 | 31.23  |
| rs2531992  | A  | G  | -0.028 | 0.005 | 3.00E-09 | 34.03  |
| rs2820292  | A  | C  | -0.019 | 0.003 | 2.40E-08 | 31.23  |
| rs3127553  | G  | A  | 0.023  | 0.004 | 1.60E-10 | 43.18  |
| rs3810291  | A  | G  | 0.026  | 0.004 | 1.70E-10 | 42.25  |
| rs3849570  | A  | C  | 0.021  | 0.004 | 2.20E-08 | 30.54  |
| rs4130548  | C  | T  | 0.022  | 0.004 | 3.40E-10 | 39.51  |
| rs6163     | C  | A  | -0.019 | 0.004 | 3.70E-08 | 29.47  |
| rs633715   | C  | T  | 0.043  | 0.004 | 3.30E-23 | 100.00 |
| rs6440003  | G  | A  | -0.021 | 0.003 | 2.90E-10 | 38.15  |
| rs6545714  | G  | A  | 0.022  | 0.004 | 1.90E-10 | 39.51  |
| rs6567160  | C  | T  | 0.048  | 0.004 | 2.60E-33 | 144.00 |
| rs6755502  | T  | C  | -0.051 | 0.005 | 2.00E-30 | 128.44 |
| rs7138803  | G  | A  | -0.028 | 0.004 | 1.60E-15 | 64.00  |
| rs7144011  | T  | G  | 0.033  | 0.004 | 9.40E-16 | 64.78  |
| rs7239883  | G  | A  | 0.021  | 0.004 | 2.30E-09 | 36.00  |
| rs7498665  | G  | A  | 0.034  | 0.004 | 1.40E-22 | 94.37  |
| rs7531118  | T  | C  | -0.027 | 0.004 | 1.50E-14 | 59.51  |
| rs7550711  | T  | C  | 0.058  | 0.010 | 3.40E-09 | 35.03  |
| rs7903146  | T  | C  | -0.022 | 0.004 | 3.90E-09 | 35.35  |
| rs806794   | G  | A  | -0.022 | 0.004 | 2.10E-09 | 35.35  |

|           |   |   |       |       |          |       |
|-----------|---|---|-------|-------|----------|-------|
| rs929641  | A | G | 0.021 | 0.003 | 1.20E-09 | 38.15 |
| rs9400239 | C | T | 0.024 | 0.004 | 1.90E-11 | 44.44 |
| rs943005  | T | C | 0.039 | 0.004 | 7.20E-19 | 78.56 |

---
