# Supplementary material for: Identifying modifiable risk factors of lung cancer: Indications from Mendelian randomization
Source: PubMed Central journal article supplement (PMC8523078; doi:10.1371/journal.pone.0258498), 2021-10-18
Supplement: pone.0258498.s021.pdf [file pone.0258498.s021.pdf]

**S8 Table: Instrumental variables of WHR.** SNP is the rsID of genetic variants; A1 is the effect allele; A2 is the other allele; beta is the effect size of A1 on the exposure; se is the standard error of beta; pval is the p value of beta; F is the F statistics.

| SNP        | A1 | A2 | beta   | se    | pval     | F      |
|------------|----|----|--------|-------|----------|--------|
| rs1011731  | G  | A  | 0.019  | 0.003 | 1.10E-08 | 33.15  |
| rs10245353 | A  | C  | 0.027  | 0.004 | 1.60E-10 | 41.33  |
| rs10783615 | G  | A  | 0.035  | 0.005 | 7.00E-13 | 51.02  |
| rs10876528 | A  | C  | 0.028  | 0.004 | 1.10E-12 | 51.55  |
| rs11048470 | T  | G  | 0.025  | 0.004 | 6.30E-12 | 45.65  |
| rs1121980  | A  | G  | 0.043  | 0.003 | 1.30E-38 | 169.79 |
| rs1128249  | G  | T  | 0.021  | 0.003 | 1.60E-09 | 38.15  |
| rs11663816 | C  | T  | 0.025  | 0.004 | 2.70E-11 | 43.28  |
| rs11755724 | G  | A  | 0.019  | 0.004 | 1.70E-08 | 29.47  |
| rs12549058 | G  | T  | 0.040  | 0.006 | 3.20E-10 | 39.06  |
| rs1294421  | G  | T  | 0.025  | 0.003 | 6.90E-14 | 54.07  |
| rs1316952  | T  | C  | 0.028  | 0.005 | 7.30E-09 | 32.65  |
| rs1440372  | C  | T  | 0.021  | 0.004 | 7.60E-09 | 32.21  |
| rs1563355  | T  | C  | -0.031 | 0.004 | 1.70E-12 | 49.64  |
| rs1569135  | A  | G  | 0.024  | 0.003 | 1.00E-12 | 52.89  |
| rs16996700 | T  | C  | 0.021  | 0.004 | 1.60E-08 | 32.21  |
| rs17109256 | A  | G  | 0.023  | 0.004 | 3.00E-08 | 31.47  |
| rs17451107 | T  | C  | 0.023  | 0.004 | 3.50E-11 | 43.18  |
| rs2075650  | A  | G  | 0.029  | 0.005 | 6.40E-09 | 35.03  |
| rs2179129  | A  | G  | 0.021  | 0.003 | 1.20E-09 | 38.15  |
| rs2207139  | G  | A  | 0.025  | 0.004 | 1.40E-08 | 32.28  |
| rs2287019  | C  | T  | 0.026  | 0.005 | 4.30E-09 | 33.38  |
| rs2745359  | C  | T  | 0.063  | 0.009 | 3.80E-13 | 52.44  |
| rs2765539  | C  | T  | -0.027 | 0.004 | 1.10E-12 | 50.48  |
| rs2972164  | C  | T  | 0.019  | 0.003 | 2.40E-08 | 33.15  |
| rs3786897  | G  | A  | 0.022  | 0.003 | 4.00E-11 | 41.87  |
| rs459193   | A  | G  | 0.026  | 0.004 | 6.00E-12 | 46.81  |
| rs4640244  | G  | A  | 0.021  | 0.004 | 3.10E-08 | 32.21  |
| rs4929927  | G  | A  | 0.020  | 0.003 | 7.60E-09 | 34.60  |
| rs904453   | T  | G  | 0.018  | 0.003 | 4.30E-08 | 28.03  |
| rs929641   | A  | G  | 0.020  | 0.003 | 4.20E-09 | 36.73  |
| rs9860730  | A  | G  | 0.023  | 0.004 | 2.80E-10 | 40.82  |
| rs998584   | A  | C  | 0.029  | 0.004 | 5.00E-15 | 61.43  |
