# Supplementary material for: Identifying modifiable risk factors of lung cancer: Indications from Mendelian randomization
Source: PubMed Central journal article supplement (PMC8523078; doi:10.1371/journal.pone.0258498), 2021-10-18
Supplement: pone.0258498.s022.pdf [file pone.0258498.s022.pdf]

**S9 Table: Instrumental variables of DBP.** SNP is the rsID of genetic variants; A1 is the effect allele; A2 is the other allele; beta is the effect size of A1 on the exposure; se is the standard error of beta; pval is the p value of beta; F is the F statistics.

| SNP        | A1 | A2 | beta   | se    | pval     | F      |
|------------|----|----|--------|-------|----------|--------|
| rs1000423  | T  | C  | 0.192  | 0.020 | 9.54E-22 | 91.68  |
| rs10048404 | T  | C  | -0.110 | 0.018 | 2.01E-09 | 35.87  |
| rs10054208 | T  | C  | 0.119  | 0.019 | 1.49E-10 | 41.17  |
| rs10062036 | T  | C  | -0.152 | 0.022 | 2.13E-12 | 49.32  |
| rs10062049 | T  | C  | 0.221  | 0.026 | 4.50E-18 | 74.98  |
| rs1006545  | T  | G  | 0.363  | 0.028 | 7.96E-40 | 174.53 |
| rs10066799 | T  | G  | 0.138  | 0.019 | 9.42E-13 | 50.98  |
| rs10069690 | T  | C  | 0.162  | 0.021 | 1.42E-14 | 59.14  |
| rs10164193 | T  | G  | -0.220 | 0.033 | 1.87E-11 | 45.10  |
| rs10170954 | A  | C  | -0.105 | 0.018 | 6.90E-09 | 33.46  |
| rs10244142 | T  | C  | 0.131  | 0.019 | 5.15E-12 | 47.61  |
| rs10251493 | T  | C  | 0.126  | 0.023 | 3.92E-08 | 30.32  |
| rs1025655  | A  | G  | -0.108 | 0.018 | 1.32E-09 | 36.96  |
| rs1035514  | A  | G  | 0.161  | 0.026 | 8.25E-10 | 37.62  |
| rs1035673  | T  | C  | 0.163  | 0.018 | 3.00E-20 | 85.25  |
| rs10424224 | T  | C  | 0.104  | 0.018 | 1.05E-08 | 32.78  |
| rs10434099 | A  | C  | 0.105  | 0.018 | 4.42E-09 | 34.21  |
| rs1043809  | T  | C  | 0.159  | 0.022 | 9.77E-13 | 50.84  |
| rs1044822  | T  | C  | -0.133 | 0.024 | 4.14E-08 | 30.14  |
| rs10468291 | A  | C  | -0.117 | 0.018 | 3.70E-11 | 43.89  |
| rs1047891  | A  | C  | -0.141 | 0.019 | 8.19E-14 | 55.85  |
| rs10490923 | A  | G  | 0.153  | 0.026 | 5.02E-09 | 34.24  |
| rs10493408 | A  | C  | 0.158  | 0.026 | 5.09E-10 | 38.59  |
| rs10502214 | T  | C  | 0.125  | 0.021 | 9.40E-10 | 37.42  |
| rs10740993 | T  | C  | 0.219  | 0.017 | 3.83E-36 | 157.69 |
| rs10743086 | A  | G  | -0.132 | 0.021 | 7.46E-10 | 37.87  |
| rs10759344 | T  | C  | 0.195  | 0.032 | 9.34E-10 | 37.56  |
| rs10759697 | A  | G  | 0.131  | 0.017 | 3.94E-14 | 57.16  |
| rs10761530 | T  | C  | 0.117  | 0.017 | 1.14E-11 | 46.27  |
| rs1077393  | A  | G  | -0.248 | 0.018 | 2.32E-43 | 191.34 |
| rs10776752 | T  | G  | 0.457  | 0.033 | 1.25E-43 | 192.03 |
| rs1077795  | A  | G  | 0.199  | 0.020 | 1.62E-23 | 99.70  |
| rs10804330 | T  | C  | 0.133  | 0.018 | 4.60E-14 | 57.19  |
| rs10807003 | T  | G  | -0.136 | 0.017 | 6.76E-15 | 60.91  |
| rs10828399 | A  | G  | -0.108 | 0.017 | 5.09E-10 | 38.68  |
| rs10832013 | T  | G  | 0.152  | 0.019 | 4.51E-16 | 66.24  |
| rs10832300 | A  | G  | -0.130 | 0.018 | 2.11E-13 | 53.86  |
| rs10832586 | A  | C  | -0.308 | 0.022 | 2.53E-46 | 203.72 |
| rs10835161 | T  | G  | -0.139 | 0.018 | 1.01E-14 | 60.04  |

|             |   |   |        |       |          |        |
|-------------|---|---|--------|-------|----------|--------|
| rs10835353  | A | G | -0.108 | 0.017 | 4.50E-10 | 38.81  |
| rs10838702  | T | G | 0.238  | 0.018 | 1.27E-40 | 178.03 |
| rs10840378  | T | C | 0.278  | 0.022 | 3.33E-36 | 158.24 |
| rs10850526  | A | G | -0.202 | 0.019 | 1.61E-26 | 114.00 |
| rs10864859  | T | G | 0.196  | 0.033 | 1.52E-09 | 36.44  |
| rs10873612  | T | C | -0.110 | 0.018 | 9.51E-10 | 37.49  |
| rs10906391  | T | C | 0.129  | 0.019 | 7.57E-12 | 46.79  |
| rs10941043  | T | G | -0.127 | 0.019 | 2.52E-11 | 44.61  |
| rs10980408  | T | C | -0.375 | 0.048 | 4.17E-15 | 61.64  |
| rs11001051  | A | C | -0.108 | 0.020 | 3.25E-08 | 30.59  |
| rs11026586  | A | G | 0.290  | 0.034 | 2.68E-17 | 71.39  |
| rs11055034  | A | C | -0.135 | 0.020 | 5.90E-12 | 47.57  |
| rs11065129  | A | G | 0.137  | 0.018 | 6.30E-15 | 60.93  |
| rs11070245  | T | G | -0.129 | 0.017 | 1.57E-13 | 54.71  |
| rs11077961  | A | G | 0.107  | 0.019 | 8.55E-09 | 33.28  |
| rs11108209  | T | C | -0.190 | 0.030 | 2.40E-10 | 40.15  |
| rs1111462   | A | G | -0.163 | 0.020 | 1.20E-15 | 64.24  |
| rs111384899 | T | C | -0.143 | 0.023 | 4.62E-10 | 38.87  |
| rs11141731  | T | C | -0.126 | 0.021 | 1.31E-09 | 36.93  |
| rs1114347   | A | G | -0.179 | 0.017 | 3.32E-25 | 107.30 |
| rs11145807  | A | G | 0.155  | 0.018 | 4.10E-17 | 70.96  |
| rs11153730  | T | C | 0.155  | 0.017 | 2.57E-19 | 80.38  |
| rs11167039  | A | G | -0.178 | 0.030 | 3.60E-09 | 34.89  |
| rs111777102 | T | C | 0.214  | 0.035 | 1.56E-09 | 36.54  |
| rs11187939  | A | G | 0.105  | 0.018 | 2.11E-09 | 35.73  |
| rs11196549  | A | G | 0.445  | 0.045 | 2.94E-23 | 98.84  |
| rs112280096 | A | C | -0.119 | 0.019 | 6.95E-10 | 38.16  |
| rs112332688 | A | G | -0.114 | 0.021 | 4.43E-08 | 29.88  |
| rs11252324  | T | G | -0.234 | 0.033 | 1.03E-12 | 50.85  |
| rs112559865 | T | C | -0.276 | 0.042 | 5.59E-11 | 42.92  |
| rs11259905  | A | C | 0.130  | 0.022 | 1.29E-09 | 36.79  |
| rs113086489 | T | C | 0.179  | 0.018 | 4.40E-24 | 102.73 |
| rs1133400   | A | G | -0.132 | 0.022 | 8.30E-10 | 37.58  |
| rs113783450 | A | G | -0.126 | 0.019 | 4.75E-11 | 43.07  |
| rs1138293   | T | C | -0.128 | 0.022 | 7.05E-09 | 33.64  |
| rs114503346 | T | C | -0.268 | 0.043 | 3.10E-10 | 39.52  |
| rs11466111  | T | C | 0.668  | 0.067 | 1.94E-23 | 99.43  |
| rs115011309 | T | C | 0.185  | 0.031 | 2.55E-09 | 35.46  |
| rs115245297 | T | C | -0.312 | 0.044 | 1.06E-12 | 50.84  |
| rs11543651  | T | C | -0.116 | 0.019 | 6.64E-10 | 38.07  |
| rs115521166 | A | G | 0.391  | 0.051 | 1.57E-14 | 59.10  |
| rs11556924  | T | C | -0.181 | 0.018 | 1.83E-23 | 100.00 |
| rs11578696  | A | G | 0.146  | 0.026 | 1.65E-08 | 31.98  |
| rs11592107  | A | G | 0.120  | 0.019 | 1.23E-10 | 41.39  |

|             |   |   |        |       |          |        |
|-------------|---|---|--------|-------|----------|--------|
| rs116039813 | T | G | 0.356  | 0.059 | 1.33E-09 | 36.78  |
| rs11605229  | T | C | -0.247 | 0.028 | 2.40E-18 | 76.53  |
| rs11608122  | T | C | 0.124  | 0.020 | 2.97E-10 | 39.88  |
| rs116287796 | T | C | -0.423 | 0.066 | 1.00E-10 | 41.77  |
| rs11636952  | T | C | 0.400  | 0.019 | 5.21E-99 | 447.24 |
| rs11661473  | A | G | 0.201  | 0.020 | 1.54E-24 | 104.85 |
| rs11721984  | T | C | -0.141 | 0.018 | 1.89E-15 | 63.37  |
| rs117324780 | A | G | -0.275 | 0.049 | 2.48E-08 | 31.13  |
| rs117464403 | A | G | 0.454  | 0.068 | 2.95E-11 | 44.26  |
| rs11778153  | T | C | 0.119  | 0.018 | 5.84E-11 | 42.90  |
| rs117785419 | A | G | 0.381  | 0.069 | 2.99E-08 | 30.70  |
| rs11781001  | A | G | 0.155  | 0.024 | 1.11E-10 | 41.55  |
| rs117828113 | T | C | 0.235  | 0.035 | 3.52E-11 | 43.88  |
| rs1178979   | T | C | 0.150  | 0.022 | 9.96E-12 | 46.31  |
| rs11837982  | A | C | 0.150  | 0.018 | 2.14E-16 | 67.37  |
| rs11853359  | A | G | -0.166 | 0.018 | 1.30E-19 | 82.28  |
| rs11854184  | A | C | 0.134  | 0.021 | 2.32E-10 | 40.09  |
| rs11859505  | A | G | -0.104 | 0.018 | 9.76E-09 | 32.82  |
| rs11923343  | A | G | -0.114 | 0.018 | 3.10E-10 | 39.53  |
| rs11945489  | T | C | -0.139 | 0.019 | 3.99E-13 | 52.56  |
| rs11960210  | T | C | 0.247  | 0.018 | 3.36E-43 | 188.91 |
| rs11961593  | T | C | -0.316 | 0.035 | 1.49E-19 | 81.88  |
| rs11966966  | T | C | 0.251  | 0.020 | 3.10E-36 | 158.58 |
| rs11984138  | A | G | 0.134  | 0.021 | 2.13E-10 | 40.27  |
| rs12110481  | T | G | 0.159  | 0.019 | 7.37E-17 | 69.56  |
| rs12114418  | A | G | -0.148 | 0.021 | 1.13E-12 | 50.77  |
| rs12142296  | T | G | -0.164 | 0.025 | 8.89E-11 | 42.17  |
| rs12143164  | T | C | -0.100 | 0.018 | 4.62E-08 | 29.98  |
| rs1215469   | A | C | -0.138 | 0.021 | 5.23E-11 | 42.96  |
| rs12192720  | A | G | -0.109 | 0.019 | 1.18E-08 | 32.63  |
| rs12216886  | T | G | 0.129  | 0.022 | 4.76E-09 | 34.18  |
| rs12323265  | A | G | -0.116 | 0.018 | 1.00E-10 | 42.00  |
| rs1232482   | T | C | -0.121 | 0.018 | 6.10E-12 | 47.58  |
| rs12337056  | T | C | 0.136  | 0.023 | 2.18E-09 | 35.79  |
| rs12405515  | T | G | -0.170 | 0.017 | 1.92E-22 | 95.23  |
| rs12426178  | A | C | 0.172  | 0.024 | 8.34E-13 | 51.00  |
| rs1243876   | T | C | -0.106 | 0.019 | 2.14E-08 | 31.30  |
| rs12446456  | T | C | -0.181 | 0.018 | 3.99E-25 | 106.97 |
| rs12486605  | T | C | -0.151 | 0.018 | 1.01E-17 | 73.41  |
| rs12496226  | T | G | 0.146  | 0.019 | 5.32E-15 | 61.12  |
| rs12509595  | T | C | -0.497 | 0.019 | 1.58E-   | 670.59 |
|             |   |   |        |       | 148      |        |
| rs12515541  | T | G | 0.116  | 0.018 | 6.23E-11 | 42.65  |
| rs12536606  | T | C | -0.123 | 0.020 | 3.18E-10 | 39.79  |

|             |   |   |        |       |          |        |
|-------------|---|---|--------|-------|----------|--------|
| rs12555129  | T | G | -0.169 | 0.022 | 1.31E-14 | 59.27  |
| rs12574332  | T | C | 0.207  | 0.027 | 6.14E-15 | 60.68  |
| rs12609484  | T | G | -0.140 | 0.019 | 1.16E-13 | 55.30  |
| rs12623637  | A | G | -0.102 | 0.018 | 5.96E-09 | 33.79  |
| rs12630496  | T | C | -0.116 | 0.018 | 1.81E-10 | 40.83  |
| rs1263671   | T | C | -0.139 | 0.024 | 4.69E-09 | 34.31  |
| rs1265842   | T | C | 0.111  | 0.017 | 1.70E-10 | 40.92  |
| rs12665161  | A | G | 0.121  | 0.018 | 1.63E-11 | 45.19  |
| rs12693302  | A | G | -0.238 | 0.018 | 2.16E-39 | 172.61 |
| rs12703989  | A | G | 0.103  | 0.018 | 4.35E-09 | 34.64  |
| rs1271309   | A | G | -0.198 | 0.024 | 1.45E-16 | 67.99  |
| rs12728150  | A | G | -0.205 | 0.032 | 1.28E-10 | 41.36  |
| rs12730750  | A | G | 0.112  | 0.019 | 1.95E-09 | 35.94  |
| rs1275988   | T | C | -0.295 | 0.018 | 1.92E-62 | 276.84 |
| rs12790943  | T | C | -0.100 | 0.018 | 1.14E-08 | 32.78  |
| rs12809048  | T | C | 0.232  | 0.042 | 2.21E-08 | 31.36  |
| rs12866098  | A | G | 0.103  | 0.019 | 2.73E-08 | 30.84  |
| rs12906962  | T | C | -0.238 | 0.019 | 8.73E-37 | 160.00 |
| rs12919839  | T | C | -0.110 | 0.019 | 1.04E-08 | 32.70  |
| rs12929303  | A | G | 0.157  | 0.017 | 1.58E-19 | 81.62  |
| rs12983238  | A | G | -0.127 | 0.020 | 3.23E-10 | 39.67  |
| rs12990959  | T | C | -0.127 | 0.019 | 1.11E-11 | 46.20  |
| rs13001283  | A | G | 0.152  | 0.024 | 1.92E-10 | 40.55  |
| rs13014371  | T | C | -0.118 | 0.018 | 1.68E-11 | 45.16  |
| rs13042148  | T | C | -0.167 | 0.024 | 7.24E-12 | 47.07  |
| rs13044147  | T | G | -0.231 | 0.040 | 5.88E-09 | 33.89  |
| rs13107325  | T | C | -0.675 | 0.034 | 3.72E-88 | 396.12 |
| rs13139571  | A | C | -0.241 | 0.020 | 2.29E-32 | 140.71 |
| rs13149808  | T | C | -0.102 | 0.019 | 4.45E-08 | 29.93  |
| rs13179413  | T | C | 0.125  | 0.020 | 3.04E-10 | 39.86  |
| rs13195550  | T | C | 0.132  | 0.019 | 1.69E-12 | 49.83  |
| rs13215166  | A | G | -0.309 | 0.017 | 1.79E-70 | 316.19 |
| rs1322639   | A | G | -0.158 | 0.021 | 3.87E-14 | 57.44  |
| rs13240040  | A | G | 0.119  | 0.019 | 3.98E-10 | 38.96  |
| rs13270541  | A | G | 0.120  | 0.021 | 1.33E-08 | 32.34  |
| rs1327235   | A | G | -0.302 | 0.017 | 4.76E-68 | 304.33 |
| rs13358657  | A | G | -0.224 | 0.026 | 1.70E-18 | 77.16  |
| rs134041    | T | C | 0.122  | 0.018 | 3.05E-12 | 48.84  |
| rs137923903 | T | C | -0.818 | 0.084 | 1.59E-22 | 95.38  |
| rs1422278   | T | G | 0.232  | 0.025 | 2.28E-20 | 85.73  |
| rs142449193 | T | C | -0.257 | 0.043 | 1.51E-09 | 36.48  |
| rs1425486   | T | C | -0.133 | 0.019 | 1.11E-12 | 50.66  |
| rs1436138   | A | G | 0.199  | 0.018 | 7.33E-28 | 119.67 |
| rs145211473 | A | G | 0.362  | 0.063 | 1.14E-08 | 32.62  |

|             |   |   |        |       |          |        |
|-------------|---|---|--------|-------|----------|--------|
| rs1454393   | A | C | -0.101 | 0.017 | 4.54E-09 | 34.29  |
| rs1465249   | T | C | 0.096  | 0.018 | 3.56E-08 | 30.34  |
| rs1468520   | A | G | -0.164 | 0.023 | 2.49E-12 | 49.00  |
| rs148401029 | A | C | -0.312 | 0.049 | 1.32E-10 | 41.27  |
| rs148775688 | T | C | 0.383  | 0.068 | 1.40E-08 | 32.14  |
| rs1490384   | T | C | 0.098  | 0.017 | 1.59E-08 | 31.89  |
| rs149731397 | A | G | 0.552  | 0.085 | 8.52E-11 | 42.11  |
| rs150816167 | T | C | -0.287 | 0.045 | 1.17E-10 | 41.50  |
| rs152130    | A | G | -0.118 | 0.019 | 9.70E-10 | 37.52  |
| rs1536608   | T | G | 0.106  | 0.018 | 1.70E-09 | 36.34  |
| rs1543310   | T | C | -0.139 | 0.018 | 7.31E-15 | 60.56  |
| rs1561719   | T | C | -0.149 | 0.025 | 1.77E-09 | 36.29  |
| rs1565716   | A | G | 0.214  | 0.034 | 3.45E-10 | 39.35  |
| rs1571737   | T | C | 0.130  | 0.023 | 1.45E-08 | 32.23  |
| rs1582931   | A | G | 0.216  | 0.018 | 4.51E-35 | 152.49 |
| rs162887    | A | G | 0.112  | 0.019 | 3.87E-09 | 34.62  |
| rs1641547   | A | G | 0.146  | 0.018 | 2.83E-16 | 67.18  |
| rs167479    | T | G | -0.362 | 0.019 | 1.67E-82 | 370.77 |
| rs16848690  | T | C | 0.183  | 0.029 | 1.90E-10 | 40.51  |
| rs16852778  | T | C | 0.161  | 0.024 | 4.03E-11 | 43.68  |
| rs16853084  | T | C | -0.272 | 0.049 | 2.57E-08 | 30.98  |
| rs1687295   | T | C | 0.206  | 0.019 | 2.99E-26 | 112.86 |
| rs16875357  | T | G | -0.121 | 0.020 | 2.70E-09 | 35.24  |
| rs1688796   | T | C | 0.136  | 0.020 | 1.15E-11 | 45.97  |
| rs17004519  | A | G | 0.365  | 0.066 | 3.48E-08 | 30.42  |
| rs17224476  | A | G | 0.160  | 0.028 | 7.37E-09 | 33.48  |
| rs1727311   | T | G | -0.203 | 0.022 | 3.96E-20 | 84.37  |
| rs17321041  | T | C | 0.231  | 0.036 | 1.78E-10 | 40.60  |
| rs17361679  | T | C | 0.164  | 0.029 | 1.52E-08 | 32.12  |
| rs17362588  | A | G | 0.333  | 0.031 | 9.27E-28 | 119.20 |
| rs17376426  | T | C | 0.313  | 0.050 | 3.42E-10 | 39.45  |
| rs17396055  | A | G | -0.115 | 0.018 | 4.13E-10 | 39.06  |
| rs17422386  | A | G | 0.262  | 0.044 | 3.13E-09 | 35.11  |
| rs17454517  | A | G | 0.122  | 0.017 | 2.65E-12 | 48.84  |
| rs17473424  | A | G | 0.273  | 0.029 | 1.23E-21 | 91.12  |
| rs17611141  | T | G | -0.383 | 0.043 | 8.88E-19 | 78.20  |
| rs17626956  | A | G | -0.340 | 0.053 | 1.38E-10 | 41.24  |
| rs17880989  | A | G | 0.401  | 0.059 | 1.11E-11 | 46.13  |
| rs1807870   | A | G | 0.103  | 0.018 | 5.87E-09 | 33.99  |
| rs1819663   | A | G | 0.115  | 0.017 | 4.63E-11 | 43.45  |
| rs1821295   | T | C | -0.138 | 0.019 | 3.13E-13 | 53.31  |
| rs1842646   | A | C | 0.098  | 0.018 | 2.65E-08 | 30.91  |
| rs1848510   | A | G | 0.126  | 0.018 | 4.10E-12 | 48.15  |
| rs1861881   | T | G | 0.115  | 0.019 | 6.49E-10 | 38.23  |

|           |   |   |        |       |          |        |
|-----------|---|---|--------|-------|----------|--------|
| rs1863798 | A | G | -0.100 | 0.018 | 3.26E-08 | 30.59  |
| rs1867624 | T | C | 0.141  | 0.018 | 2.08E-15 | 62.93  |
| rs1871190 | T | G | 0.108  | 0.019 | 6.63E-09 | 33.59  |
| rs1876490 | A | G | 0.136  | 0.019 | 1.16E-12 | 50.47  |
| rs1879056 | T | C | -0.216 | 0.022 | 6.19E-23 | 97.19  |
| rs1882961 | T | C | 0.127  | 0.019 | 1.40E-11 | 45.78  |
| rs189110  | A | G | -0.256 | 0.045 | 1.56E-08 | 32.04  |
| rs1906672 | A | G | 0.140  | 0.021 | 8.48E-12 | 46.77  |
| rs1947228 | T | C | -0.145 | 0.018 | 2.59E-16 | 66.93  |
| rs1950500 | T | C | 0.140  | 0.019 | 2.20E-13 | 53.98  |
| rs195486  | T | C | 0.121  | 0.018 | 1.18E-11 | 46.13  |
| rs1969539 | A | G | 0.098  | 0.017 | 1.68E-08 | 31.76  |
| rs1980607 | A | G | 0.123  | 0.019 | 1.51E-10 | 40.91  |
| rs1984195 | A | G | 0.174  | 0.017 | 1.43E-23 | 100.69 |
| rs1986971 | A | G | 0.105  | 0.019 | 4.60E-08 | 29.74  |
| rs198851  | T | G | 0.389  | 0.024 | 2.93E-57 | 254.04 |
| rs1996992 | T | G | -0.297 | 0.039 | 4.71E-14 | 56.71  |
| rs2009733 | A | G | 0.122  | 0.018 | 5.10E-12 | 47.81  |
| rs2012831 | A | G | 0.107  | 0.019 | 1.83E-08 | 31.60  |
| rs2060664 | T | C | 0.109  | 0.020 | 4.65E-08 | 29.76  |
| rs2065152 | T | C | 0.110  | 0.018 | 8.95E-10 | 37.55  |
| rs2065498 | T | G | -0.146 | 0.023 | 4.19E-10 | 39.00  |
| rs2085600 | A | G | -0.131 | 0.023 | 7.00E-09 | 33.45  |
| rs2098839 | T | C | 0.175  | 0.018 | 1.31E-21 | 91.34  |
| rs2105388 | A | C | 0.140  | 0.018 | 1.28E-15 | 63.91  |
| rs2146315 | T | C | -0.120 | 0.021 | 5.03E-09 | 34.09  |
| rs2162003 | T | C | 0.128  | 0.018 | 3.20E-12 | 48.85  |
| rs2165702 | A | G | -0.142 | 0.018 | 2.01E-15 | 63.02  |
| rs217209  | T | C | 0.157  | 0.025 | 3.53E-10 | 39.50  |
| rs2173957 | A | G | 0.108  | 0.018 | 2.09E-09 | 35.87  |
| rs223361  | T | C | 0.170  | 0.018 | 2.70E-20 | 85.16  |
| rs2236295 | T | G | -0.207 | 0.018 | 1.42E-31 | 136.77 |
| rs2239268 | A | G | 0.110  | 0.019 | 7.40E-09 | 33.34  |
| rs2240075 | A | G | -0.148 | 0.020 | 4.32E-14 | 56.94  |
| rs2242338 | A | C | 0.346  | 0.033 | 1.25E-25 | 109.46 |
| rs2252865 | T | C | 0.119  | 0.018 | 5.51E-11 | 43.15  |
| rs2269579 | A | G | -0.177 | 0.029 | 1.09E-09 | 37.30  |
| rs2273171 | T | C | -0.098 | 0.017 | 1.30E-08 | 32.35  |
| rs227426  | T | G | 0.112  | 0.018 | 1.75E-10 | 40.89  |
| rs2282823 | T | C | 0.135  | 0.024 | 3.03E-08 | 30.61  |
| rs2288464 | A | C | -0.168 | 0.029 | 1.04E-08 | 32.69  |
| rs2289123 | T | G | -0.119 | 0.022 | 2.91E-08 | 30.63  |
| rs2298807 | T | C | 0.123  | 0.021 | 4.89E-09 | 34.15  |
| rs2306363 | T | G | -0.264 | 0.022 | 1.63E-34 | 149.72 |

|            |   |   |        |       |          |        |
|------------|---|---|--------|-------|----------|--------|
| rs2307111  | T | C | -0.174 | 0.018 | 1.62E-22 | 95.78  |
| rs234614   | T | G | -0.154 | 0.019 | 1.58E-15 | 63.34  |
| rs2384061  | A | G | -0.174 | 0.018 | 2.25E-23 | 98.97  |
| rs2425757  | T | C | -0.108 | 0.019 | 1.14E-08 | 32.70  |
| rs2439371  | A | C | 0.135  | 0.024 | 1.30E-08 | 32.40  |
| rs2450128  | A | G | -0.151 | 0.024 | 3.53E-10 | 39.32  |
| rs2478835  | T | C | -0.109 | 0.018 | 5.04E-10 | 38.57  |
| rs2484294  | A | G | 0.317  | 0.020 | 1.17E-58 | 260.76 |
| rs2493288  | A | G | 0.254  | 0.025 | 1.97E-23 | 99.69  |
| rs2513877  | A | G | -0.129 | 0.022 | 4.22E-09 | 34.60  |
| rs2546963  | T | C | 0.097  | 0.018 | 3.66E-08 | 30.44  |
| rs2569882  | T | C | 0.120  | 0.018 | 4.28E-11 | 43.40  |
| rs2586408  | A | G | 0.115  | 0.020 | 4.09E-09 | 34.60  |
| rs2586970  | A | G | -0.149 | 0.018 | 1.56E-17 | 72.79  |
| rs2589254  | A | G | -0.121 | 0.020 | 1.11E-09 | 37.22  |
| rs2601831  | T | C | -0.166 | 0.027 | 7.84E-10 | 37.85  |
| rs2627316  | A | G | -0.154 | 0.017 | 7.37E-19 | 78.74  |
| rs2629665  | A | C | -0.119 | 0.018 | 1.52E-11 | 45.43  |
| rs2638395  | T | G | 0.126  | 0.021 | 9.88E-10 | 37.17  |
| rs2643826  | T | C | 0.186  | 0.018 | 2.83E-26 | 112.60 |
| rs2680663  | A | G | -0.178 | 0.019 | 7.33E-22 | 92.47  |
| rs2681485  | A | G | 0.295  | 0.018 | 1.31E-62 | 279.99 |
| rs2693560  | A | G | -0.150 | 0.018 | 1.09E-16 | 68.77  |
| rs2695258  | T | C | 0.116  | 0.021 | 4.35E-08 | 30.02  |
| rs2744133  | A | G | 0.144  | 0.019 | 1.17E-13 | 55.28  |
| rs2801008  | T | G | -0.105 | 0.019 | 2.14E-08 | 31.41  |
| rs28362590 | T | G | 0.124  | 0.020 | 8.70E-10 | 37.43  |
| rs2836411  | T | C | 0.156  | 0.018 | 1.72E-17 | 72.07  |
| rs28377357 | A | G | -0.124 | 0.019 | 6.03E-11 | 42.80  |
| rs28429256 | A | G | 0.164  | 0.019 | 2.83E-18 | 75.73  |
| rs28453037 | A | C | -0.179 | 0.022 | 9.08E-16 | 64.72  |
| rs28498052 | A | G | -0.255 | 0.043 | 3.53E-09 | 34.79  |
| rs28544928 | T | G | 0.154  | 0.020 | 9.13E-15 | 60.12  |
| rs28564120 | A | G | -0.125 | 0.022 | 1.22E-08 | 32.42  |
| rs28570096 | T | C | 0.140  | 0.019 | 1.15E-13 | 55.14  |
| rs28661492 | T | C | -0.136 | 0.022 | 9.56E-10 | 37.47  |
| rs28675079 | A | G | -0.144 | 0.022 | 8.34E-11 | 42.31  |
| rs2888691  | A | G | -0.194 | 0.024 | 2.33E-15 | 62.89  |
| rs2906152  | A | G | -0.187 | 0.018 | 5.55E-25 | 107.08 |
| rs2921604  | T | C | -0.096 | 0.018 | 4.46E-08 | 29.75  |
| rs2925345  | T | C | 0.189  | 0.017 | 1.60E-27 | 117.98 |
| rs2927071  | T | C | -0.139 | 0.019 | 6.43E-13 | 51.48  |
| rs2940928  | A | G | -0.126 | 0.022 | 7.56E-09 | 33.31  |
| rs2957468  | A | G | 0.138  | 0.019 | 8.43E-14 | 55.40  |

|            |   |   |        |       |          |        |
|------------|---|---|--------|-------|----------|--------|
| rs297690   | T | G | -0.130 | 0.020 | 5.54E-11 | 42.91  |
| rs2978098  | A | C | 0.155  | 0.018 | 1.33E-18 | 77.36  |
| rs2994648  | T | C | 0.131  | 0.022 | 3.33E-09 | 34.82  |
| rs2999159  | A | G | -0.306 | 0.023 | 1.79E-40 | 177.24 |
| rs303217   | T | C | -0.096 | 0.018 | 4.06E-08 | 30.09  |
| rs306209   | A | G | 0.109  | 0.020 | 2.52E-08 | 31.10  |
| rs3107147  | A | G | 0.106  | 0.018 | 3.26E-09 | 35.07  |
| rs311564   | A | G | -0.133 | 0.018 | 4.23E-13 | 52.82  |
| rs3117736  | T | C | 0.237  | 0.020 | 9.71E-34 | 146.71 |
| rs3118904  | A | G | 0.116  | 0.018 | 1.75E-10 | 40.69  |
| rs314376   | A | G | -0.136 | 0.017 | 3.79E-15 | 62.16  |
| rs318719   | T | C | -0.243 | 0.033 | 3.16E-13 | 52.98  |
| rs3213545  | A | G | 0.111  | 0.020 | 1.06E-08 | 32.58  |
| rs334414   | T | C | -0.102 | 0.018 | 1.64E-08 | 32.01  |
| rs33996239 | T | C | -0.251 | 0.038 | 2.86E-11 | 44.20  |
| rs34029821 | A | G | -0.167 | 0.019 | 6.97E-18 | 74.01  |
| rs34130368 | T | G | -0.203 | 0.028 | 8.77E-13 | 50.94  |
| rs34163044 | A | C | 0.149  | 0.018 | 9.63E-17 | 68.92  |
| rs34196696 | T | C | 0.134  | 0.021 | 1.86E-10 | 40.53  |
| rs342130   | A | G | 0.110  | 0.018 | 6.17E-10 | 38.40  |
| rs34245489 | T | C | 0.242  | 0.042 | 8.00E-09 | 33.25  |
| rs34297584 | A | G | 0.489  | 0.064 | 2.78E-14 | 57.93  |
| rs342989   | A | G | 0.163  | 0.021 | 3.05E-15 | 62.08  |
| rs34517439 | A | C | -0.251 | 0.028 | 2.02E-19 | 81.19  |
| rs34678172 | A | G | -0.172 | 0.021 | 8.28E-17 | 69.39  |
| rs347585   | T | C | 0.151  | 0.019 | 1.57E-15 | 63.49  |
| rs35091929 | T | C | 0.183  | 0.018 | 6.46E-25 | 106.66 |
| rs35100429 | A | C | -0.096 | 0.018 | 3.46E-08 | 30.28  |
| rs35213536 | T | G | 0.204  | 0.021 | 2.54E-23 | 99.42  |
| rs35287509 | T | C | -0.108 | 0.018 | 4.17E-09 | 34.58  |
| rs35413927 | A | G | -0.127 | 0.019 | 1.77E-11 | 45.44  |
| rs35552228 | T | G | -0.118 | 0.021 | 3.09E-08 | 30.53  |
| rs35783704 | A | G | -0.213 | 0.029 | 2.28E-13 | 53.68  |
| rs35927325 | T | C | 0.222  | 0.036 | 1.01E-09 | 37.23  |
| rs36092215 | A | G | -0.265 | 0.046 | 7.25E-09 | 33.48  |
| rs36152087 | A | G | -0.131 | 0.018 | 2.73E-13 | 53.13  |
| rs3735318  | A | G | -0.101 | 0.017 | 4.72E-09 | 34.35  |
| rs3735533  | T | C | -0.487 | 0.033 | 6.32E-49 | 216.47 |
| rs3744010  | A | G | -0.143 | 0.020 | 2.01E-12 | 49.41  |
| rs3766694  | T | C | 0.110  | 0.018 | 4.07E-10 | 39.28  |
| rs3771300  | T | G | -0.098 | 0.017 | 1.72E-08 | 31.76  |
| rs3772219  | A | C | 0.175  | 0.019 | 2.94E-21 | 89.89  |
| rs3774702  | A | G | 0.147  | 0.023 | 1.18E-10 | 41.57  |
| rs3776299  | A | G | 0.127  | 0.018 | 5.06E-13 | 52.33  |



|            |   |   |        |       |          |        |
|------------|---|---|--------|-------|----------|--------|
| rs3782480  | T | G | 0.151  | 0.027 | 3.35E-08 | 30.47  |
| rs3795320  | T | G | -0.118 | 0.020 | 4.44E-09 | 34.29  |
| rs3798293  | A | G | -0.133 | 0.021 | 2.70E-10 | 39.99  |
| rs3802230  | A | C | -0.161 | 0.017 | 2.75E-20 | 85.08  |
| rs3807101  | T | C | -0.174 | 0.027 | 4.57E-11 | 43.26  |
| rs3821843  | A | G | 0.171  | 0.019 | 5.39E-19 | 78.95  |
| rs3861113  | A | C | 0.213  | 0.032 | 3.95E-11 | 43.59  |
| rs387865   | T | C | -0.106 | 0.019 | 3.17E-08 | 30.74  |
| rs3898618  | T | C | -0.268 | 0.038 | 2.49E-12 | 48.96  |
| rs3918226  | T | C | 0.612  | 0.033 | 5.31E-77 | 345.69 |
| rs39281    | A | G | 0.128  | 0.018 | 3.97E-13 | 52.46  |
| rs3943093  | T | C | 0.248  | 0.018 | 3.95E-41 | 181.22 |
| rs3996330  | A | C | -0.129 | 0.018 | 4.00E-13 | 52.79  |
| rs4007357  | A | G | 0.102  | 0.019 | 4.23E-08 | 29.87  |
| rs404682   | A | G | 0.106  | 0.018 | 1.49E-09 | 36.69  |
| rs4074812  | A | G | -0.134 | 0.018 | 2.07E-14 | 58.28  |
| rs4077158  | T | C | -0.183 | 0.017 | 3.09E-26 | 112.14 |
| rs41267086 | A | G | 0.265  | 0.040 | 2.90E-11 | 44.14  |
| rs4141663  | T | C | -0.150 | 0.018 | 1.41E-17 | 73.08  |
| rs41475048 | A | G | -0.123 | 0.020 | 9.93E-10 | 37.26  |
| rs41525648 | A | G | 0.145  | 0.018 | 2.48E-16 | 66.83  |
| rs4240358  | A | G | 0.126  | 0.021 | 4.23E-09 | 34.39  |
| rs425011   | A | G | -0.132 | 0.019 | 1.10E-11 | 46.16  |
| rs4270476  | T | C | 0.118  | 0.018 | 5.24E-11 | 43.27  |
| rs4300482  | A | G | -0.101 | 0.018 | 4.64E-08 | 29.83  |
| rs4315061  | T | C | 0.125  | 0.018 | 2.24E-12 | 49.00  |
| rs4320727  | A | G | 0.143  | 0.018 | 1.80E-15 | 63.11  |
| rs4362428  | A | C | -0.113 | 0.018 | 1.45E-10 | 41.00  |
| rs4420291  | A | G | 0.097  | 0.017 | 2.17E-08 | 31.14  |
| rs4421757  | A | G | 0.098  | 0.017 | 1.63E-08 | 31.79  |
| rs4424827  | T | C | -0.098 | 0.018 | 2.11E-08 | 31.42  |
| rs4507125  | A | C | -0.124 | 0.021 | 3.60E-09 | 34.76  |
| rs45474499 | T | C | 0.356  | 0.042 | 8.50E-18 | 73.67  |
| rs45572038 | T | C | 0.356  | 0.051 | 2.27E-12 | 49.19  |
| rs4615669  | A | G | -0.114 | 0.017 | 6.10E-11 | 42.93  |
| rs4634143  | T | C | 0.116  | 0.019 | 7.89E-10 | 37.73  |
| rs4651224  | T | C | 0.110  | 0.018 | 3.39E-10 | 39.65  |
| rs4675297  | A | G | -0.128 | 0.018 | 3.16E-12 | 48.70  |
| rs4675682  | T | C | -0.141 | 0.017 | 4.49E-16 | 66.33  |
| rs4704514  | T | C | 0.109  | 0.019 | 1.71E-08 | 31.72  |
| rs4705695  | T | C | -0.144 | 0.017 | 1.18E-16 | 68.78  |
| rs4709746  | T | C | -0.145 | 0.026 | 2.21E-08 | 31.21  |
| rs4713650  | T | C | -0.120 | 0.018 | 2.23E-11 | 44.67  |
| rs4725579  | A | C | 0.146  | 0.022 | 2.96E-11 | 44.14  |

|            |   |   |        |       |          |        |
|------------|---|---|--------|-------|----------|--------|
| rs4729628  | T | C | -0.185 | 0.031 | 3.11E-09 | 35.01  |
| rs4761524  | A | G | 0.096  | 0.017 | 2.77E-08 | 30.86  |
| rs4773140  | A | G | -0.139 | 0.021 | 2.90E-11 | 44.34  |
| rs4788444  | A | G | -0.145 | 0.024 | 1.36E-09 | 36.76  |
| rs4800420  | A | G | 0.119  | 0.019 | 5.18E-10 | 38.54  |
| rs4808046  | A | G | -0.140 | 0.021 | 1.30E-11 | 45.68  |
| rs4810846  | T | C | 0.142  | 0.018 | 8.98E-16 | 64.73  |
| rs481795   | T | C | 0.168  | 0.024 | 1.81E-12 | 49.59  |
| rs4818833  | A | G | -0.156 | 0.018 | 1.93E-18 | 77.01  |
| rs4837127  | T | C | 0.117  | 0.021 | 2.61E-08 | 31.09  |
| rs4864421  | T | C | -0.127 | 0.018 | 8.75E-13 | 51.32  |
| rs4873492  | T | C | 0.140  | 0.023 | 1.28E-09 | 36.78  |
| rs4875958  | A | G | 0.106  | 0.019 | 4.39E-08 | 29.94  |
| rs4891258  | A | G | -0.116 | 0.019 | 5.72E-10 | 38.41  |
| rs4903064  | T | C | 0.154  | 0.021 | 7.84E-14 | 56.10  |
| rs4908671  | A | C | 0.108  | 0.018 | 1.36E-09 | 36.68  |
| rs4924570  | T | C | -0.169 | 0.018 | 9.62E-21 | 87.39  |
| rs4926923  | T | C | 0.192  | 0.031 | 4.75E-10 | 38.78  |
| rs4932373  | A | C | -0.366 | 0.019 | 7.71E-84 | 375.83 |
| rs4936099  | A | C | 0.175  | 0.018 | 1.16E-22 | 96.11  |
| rs4948550  | T | C | -0.111 | 0.019 | 1.00E-08 | 32.97  |
| rs4948643  | T | C | 0.159  | 0.019 | 2.26E-16 | 67.26  |
| rs4952668  | A | G | -0.192 | 0.018 | 1.13E-26 | 113.78 |
| rs4954192  | T | C | -0.123 | 0.018 | 8.15E-12 | 46.83  |
| rs4974072  | A | G | 0.105  | 0.017 | 1.63E-09 | 36.28  |
| rs4984496  | T | G | 0.176  | 0.019 | 4.93E-21 | 88.88  |
| rs4998802  | A | G | -0.107 | 0.020 | 4.42E-08 | 29.91  |
| rs5025116  | T | C | 0.096  | 0.018 | 4.97E-08 | 29.57  |
| rs504217   | T | C | 0.275  | 0.034 | 2.51E-16 | 67.14  |
| rs504691   | A | C | -0.118 | 0.018 | 3.14E-11 | 44.22  |
| rs507666   | A | G | -0.285 | 0.022 | 2.27E-37 | 163.79 |
| rs521033   | A | G | -0.180 | 0.025 | 1.10E-12 | 50.73  |
| rs55641580 | T | C | 0.175  | 0.027 | 4.79E-11 | 43.36  |
| rs55684003 | A | G | 0.122  | 0.019 | 1.01E-10 | 41.67  |
| rs55706574 | A | G | -0.115 | 0.019 | 3.20E-09 | 35.20  |
| rs55710016 | A | G | 0.116  | 0.017 | 2.72E-11 | 44.21  |
| rs55747751 | A | G | -0.224 | 0.033 | 1.39E-11 | 45.76  |
| rs55770741 | T | C | -0.128 | 0.018 | 2.20E-13 | 53.58  |
| rs55857306 | A | G | -0.522 | 0.024 | 5.05E-   | 494.16 |
|            |   |   |        |       | 109      |        |
| rs55935819 | A | G | 0.127  | 0.018 | 1.96E-12 | 49.31  |
| rs55938136 | A | G | 0.141  | 0.023 | 4.21E-10 | 39.16  |
| rs55944332 | A | G | -0.237 | 0.020 | 3.27E-31 | 134.40 |
| rs55993676 | T | G | -0.210 | 0.019 | 3.82E-28 | 120.54 |

|            |   |   |        |       |          |        |
|------------|---|---|--------|-------|----------|--------|
| rs56074814 | T | C | 0.124  | 0.020 | 4.96E-10 | 38.69  |
| rs56233017 | A | G | -0.274 | 0.044 | 4.37E-10 | 38.86  |
| rs56254331 | A | C | -0.145 | 0.025 | 3.43E-09 | 34.98  |
| rs56256111 | A | G | 0.193  | 0.026 | 2.60E-13 | 53.63  |
| rs56335308 | A | G | 0.355  | 0.057 | 6.31E-10 | 38.25  |
| rs56345595 | A | G | 0.133  | 0.018 | 5.20E-14 | 56.38  |
| rs56388530 | T | C | 0.229  | 0.021 | 7.45E-29 | 123.68 |
| rs56401299 | T | C | 0.100  | 0.018 | 4.50E-08 | 30.10  |
| rs56411469 | A | C | 0.206  | 0.032 | 7.22E-11 | 42.56  |
| rs568032   | A | G | -0.267 | 0.039 | 6.28E-12 | 47.15  |
| rs56810307 | T | C | -0.155 | 0.027 | 1.29E-08 | 32.24  |
| rs569550   | T | G | -0.269 | 0.018 | 1.23E-49 | 220.55 |
| rs57091267 | A | G | -0.180 | 0.022 | 2.72E-16 | 66.87  |
| rs57327054 | T | C | -0.117 | 0.019 | 8.07E-10 | 37.72  |
| rs57361399 | T | C | -0.165 | 0.021 | 1.20E-15 | 64.16  |
| rs57490543 | A | C | 0.169  | 0.030 | 1.22E-08 | 32.53  |
| rs57786342 | A | G | 0.142  | 0.022 | 4.37E-11 | 43.40  |
| rs588273   | A | G | -0.115 | 0.018 | 7.85E-11 | 42.55  |
| rs5992929  | T | C | 0.168  | 0.019 | 3.07E-18 | 76.13  |
| rs60143695 | T | C | -0.174 | 0.028 | 6.64E-10 | 38.20  |
| rs6021247  | A | G | 0.130  | 0.017 | 8.21E-14 | 55.56  |
| rs6031431  | A | G | -0.115 | 0.018 | 4.94E-11 | 43.41  |
| rs6039211  | A | G | 0.178  | 0.018 | 6.82E-23 | 97.15  |
| rs6040421  | A | G | 0.096  | 0.017 | 4.17E-08 | 30.12  |
| rs604723   | T | C | -0.385 | 0.019 | 2.32E-87 | 393.43 |
| rs6060262  | A | C | 0.180  | 0.024 | 4.80E-14 | 56.60  |
| rs6062295  | A | G | -0.120 | 0.018 | 1.17E-11 | 45.81  |
| rs6062533  | A | G | -0.144 | 0.021 | 3.32E-12 | 48.66  |
| rs6076983  | T | C | 0.125  | 0.018 | 1.61E-12 | 49.87  |
| rs6081555  | T | G | -0.102 | 0.018 | 3.06E-08 | 30.76  |
| rs61408836 | T | C | -0.128 | 0.022 | 5.69E-09 | 34.00  |
| rs61772592 | A | G | -0.151 | 0.026 | 7.42E-09 | 33.43  |
| rs61789369 | A | G | -0.304 | 0.044 | 3.07E-12 | 48.58  |
| rs61879810 | A | G | 0.165  | 0.024 | 1.35E-11 | 45.83  |
| rs61926149 | T | G | 0.518  | 0.091 | 1.30E-08 | 32.31  |
| rs61932870 | T | G | -0.418 | 0.054 | 1.42E-14 | 59.15  |
| rs62004794 | A | G | -0.096 | 0.017 | 3.38E-08 | 30.57  |
| rs62011935 | T | C | 0.136  | 0.022 | 2.80E-10 | 39.82  |
| rs62012629 | A | C | -0.186 | 0.021 | 2.41E-19 | 80.91  |
| rs62030049 | A | G | 0.134  | 0.021 | 1.55E-10 | 40.86  |
| rs62155750 | A | G | -0.218 | 0.020 | 8.27E-29 | 123.37 |
| rs62158170 | A | G | 0.165  | 0.021 | 6.63E-15 | 60.78  |
| rs62169544 | A | G | -0.121 | 0.018 | 4.96E-12 | 47.57  |
| rs62250937 | T | C | 0.186  | 0.032 | 6.35E-09 | 33.82  |

|            |   |   |        |       |          |        |
|------------|---|---|--------|-------|----------|--------|
| rs62264113 | A | G | 0.153  | 0.028 | 4.66E-08 | 29.86  |
| rs62301873 | A | G | -0.173 | 0.028 | 1.06E-09 | 37.28  |
| rs62380354 | A | C | 0.183  | 0.029 | 3.68E-10 | 39.33  |
| rs62413470 | A | G | -0.166 | 0.024 | 9.07E-12 | 46.61  |
| rs62434124 | T | C | -0.485 | 0.034 | 7.83E-47 | 206.15 |
| rs62503324 | T | C | 0.203  | 0.020 | 2.11E-23 | 99.31  |
| rs62505281 | A | G | 0.114  | 0.020 | 6.08E-09 | 33.77  |
| rs6271     | T | C | -0.431 | 0.035 | 1.72E-34 | 150.13 |
| rs6442105  | A | G | -0.249 | 0.019 | 3.10E-41 | 180.43 |
| rs6442608  | T | C | -0.134 | 0.023 | 7.49E-09 | 33.31  |
| rs645144   | T | C | 0.101  | 0.019 | 4.15E-08 | 30.04  |
| rs645394   | A | G | -0.099 | 0.018 | 1.95E-08 | 31.45  |
| rs6457718  | A | G | -0.117 | 0.018 | 7.96E-11 | 42.32  |
| rs6458374  | T | C | 0.155  | 0.022 | 2.33E-12 | 49.38  |
| rs6464165  | T | C | -0.217 | 0.020 | 7.34E-29 | 123.84 |
| rs6504163  | T | C | -0.184 | 0.018 | 6.30E-24 | 101.32 |
| rs650724   | A | G | -0.197 | 0.031 | 1.30E-10 | 41.30  |
| rs6511291  | T | C | -0.116 | 0.018 | 6.89E-11 | 42.80  |
| rs6544610  | A | G | 0.136  | 0.021 | 9.52E-11 | 41.76  |
| rs6546810  | T | C | -0.120 | 0.018 | 3.16E-11 | 43.95  |
| rs6547850  | T | G | -0.111 | 0.017 | 2.07E-10 | 40.55  |
| rs6555205  | T | C | -0.097 | 0.018 | 3.84E-08 | 30.41  |
| rs6555948  | A | G | 0.096  | 0.018 | 4.71E-08 | 29.75  |
| rs6565174  | A | C | -0.195 | 0.028 | 2.42E-12 | 49.20  |
| rs6580970  | T | C | -0.166 | 0.019 | 4.03E-18 | 75.63  |
| rs668459   | T | C | -0.113 | 0.018 | 1.01E-10 | 41.84  |
| rs6686889  | T | C | 0.192  | 0.020 | 6.95E-22 | 92.89  |
| rs66887589 | T | C | -0.161 | 0.017 | 1.83E-20 | 85.62  |
| rs6708660  | T | C | 0.117  | 0.018 | 3.97E-11 | 43.47  |
| rs67535236 | A | G | 0.168  | 0.023 | 1.39E-13 | 54.77  |
| rs6758859  | T | C | 0.121  | 0.018 | 1.45E-11 | 45.77  |
| rs6776964  | A | G | 0.097  | 0.017 | 1.86E-08 | 31.63  |
| rs6777317  | A | G | 0.125  | 0.020 | 1.51E-10 | 41.03  |
| rs6779368  | A | G | -0.179 | 0.018 | 2.28E-22 | 94.74  |
| rs6807945  | T | C | -0.187 | 0.024 | 1.80E-15 | 63.05  |
| rs68085857 | T | C | 0.191  | 0.021 | 9.83E-21 | 86.81  |
| rs6819297  | T | G | 0.108  | 0.019 | 9.27E-09 | 33.05  |
| rs682681   | T | C | -0.145 | 0.019 | 4.47E-15 | 61.77  |
| rs6838416  | A | G | -0.121 | 0.019 | 8.21E-11 | 42.01  |
| rs6875967  | A | G | 0.134  | 0.018 | 1.21E-13 | 55.14  |
| rs687914   | T | G | 0.169  | 0.020 | 6.49E-17 | 69.83  |
| rs6889240  | A | G | 0.120  | 0.020 | 1.05E-09 | 37.29  |
| rs6892983  | A | C | 0.200  | 0.018 | 9.45E-30 | 128.62 |
| rs6905288  | A | G | 0.176  | 0.018 | 7.79E-23 | 96.57  |

|            |   |   |        |       |          |        |
|------------|---|---|--------|-------|----------|--------|
| rs6912283  | A | G | -0.133 | 0.017 | 2.49E-14 | 57.99  |
| rs693974   | T | C | -0.185 | 0.018 | 1.76E-25 | 108.89 |
| rs6957161  | A | G | 0.127  | 0.020 | 1.34E-10 | 41.21  |
| rs699      | A | G | -0.236 | 0.018 | 1.30E-40 | 177.63 |
| rs705696   | A | G | -0.105 | 0.018 | 1.21E-08 | 32.32  |
| rs7084783  | A | G | 0.113  | 0.017 | 7.77E-11 | 42.47  |
| rs7090758  | T | C | -0.153 | 0.017 | 6.89E-19 | 78.52  |
| rs7098414  | A | C | 0.112  | 0.020 | 1.03E-08 | 32.77  |
| rs7116797  | A | G | 0.184  | 0.028 | 5.19E-11 | 43.02  |
| rs71326977 | A | C | -0.137 | 0.023 | 2.75E-09 | 35.38  |
| rs7134060  | A | G | -0.106 | 0.017 | 1.13E-09 | 36.97  |
| rs7137749  | T | C | 0.141  | 0.018 | 7.23E-15 | 60.86  |
| rs7137828  | T | C | -0.503 | 0.018 | 4.80E-   | 815.82 |
|            |   |   |        |       | 180      |        |
| rs71409374 | A | G | -0.252 | 0.039 | 5.95E-11 | 42.81  |
| rs714785   | A | G | -0.265 | 0.047 | 1.53E-08 | 32.01  |
| rs7151887  | A | G | 0.121  | 0.020 | 3.14E-09 | 34.95  |
| rs715299   | T | G | 0.169  | 0.020 | 1.10E-17 | 73.25  |
| rs7155504  | T | C | 0.229  | 0.032 | 5.16E-13 | 52.00  |
| rs7169864  | T | C | -0.113 | 0.021 | 3.40E-08 | 30.49  |
| rs7171498  | T | C | -0.114 | 0.018 | 6.23E-11 | 42.66  |
| rs7184016  | T | G | 0.111  | 0.020 | 4.43E-08 | 29.84  |
| rs7213273  | A | G | -0.180 | 0.018 | 3.58E-23 | 98.03  |
| rs7215084  | T | C | 0.112  | 0.017 | 1.17E-10 | 41.61  |
| rs7217916  | A | G | 0.111  | 0.018 | 5.63E-10 | 38.52  |
| rs7221807  | T | C | -0.121 | 0.018 | 5.40E-12 | 47.34  |
| rs7227492  | T | C | 0.181  | 0.023 | 1.43E-15 | 63.58  |
| rs722783   | A | G | -0.209 | 0.021 | 9.03E-24 | 101.25 |
| rs7235890  | T | G | -0.169 | 0.029 | 4.12E-09 | 34.52  |
| rs7257694  | T | C | 0.184  | 0.018 | 6.28E-25 | 106.51 |
| rs72639047 | A | G | -0.153 | 0.026 | 2.29E-09 | 35.67  |
| rs72663521 | A | G | 0.126  | 0.022 | 1.42E-08 | 32.26  |
| rs72683923 | T | C | 0.533  | 0.064 | 5.02E-17 | 70.32  |
| rs72719149 | T | C | -0.128 | 0.019 | 6.34E-12 | 47.28  |
| rs72759896 | A | G | 0.159  | 0.028 | 1.06E-08 | 32.63  |
| rs72827873 | T | C | 0.181  | 0.030 | 9.05E-10 | 37.56  |
| rs72831343 | T | G | 0.494  | 0.025 | 4.77E-88 | 396.14 |
| rs72842207 | T | C | -0.211 | 0.021 | 1.10E-23 | 100.19 |
| rs72902690 | A | G | 0.148  | 0.023 | 8.62E-11 | 41.94  |
| rs72936986 | A | C | 0.114  | 0.019 | 3.33E-09 | 34.89  |
| rs72976750 | T | C | -0.172 | 0.025 | 7.37E-12 | 46.85  |
| rs72999033 | T | C | 0.279  | 0.036 | 5.95E-15 | 60.87  |
| rs73033340 | A | G | 0.531  | 0.053 | 5.06E-24 | 102.38 |
| rs73046792 | A | G | -0.152 | 0.025 | 5.87E-10 | 38.39  |

|            |   |   |        |       |          |        |
|------------|---|---|--------|-------|----------|--------|
| rs7306523  | A | G | 0.138  | 0.024 | 1.25E-08 | 32.34  |
| rs73075659 | A | G | 0.251  | 0.019 | 6.69E-42 | 183.93 |
| rs73105827 | T | G | -0.188 | 0.031 | 2.07E-09 | 36.00  |
| rs73174353 | T | C | 0.446  | 0.078 | 1.28E-08 | 32.37  |
| rs7321688  | A | C | 0.151  | 0.021 | 1.99E-13 | 54.04  |
| rs73280613 | A | G | -0.216 | 0.038 | 1.75E-08 | 31.69  |
| rs7350752  | A | G | -0.150 | 0.027 | 1.97E-08 | 31.49  |
| rs7387891  | A | G | 0.108  | 0.019 | 4.73E-09 | 34.33  |
| rs74048200 | A | G | -0.197 | 0.033 | 1.47E-09 | 36.67  |
| rs7407     | T | C | -0.134 | 0.018 | 8.81E-14 | 55.75  |
| rs7418070  | T | C | -0.141 | 0.019 | 1.30E-13 | 55.07  |
| rs7427249  | A | G | -0.110 | 0.018 | 4.34E-10 | 38.92  |
| rs74439044 | T | C | -0.350 | 0.029 | 1.38E-32 | 141.40 |
| rs74734425 | T | C | 0.404  | 0.042 | 3.52E-22 | 93.77  |
| rs7487608  | T | G | -0.141 | 0.018 | 1.77E-15 | 63.46  |
| rs7500448  | A | G | -0.130 | 0.020 | 1.14E-10 | 41.61  |
| rs7513240  | T | C | -0.109 | 0.018 | 3.11E-09 | 35.29  |
| rs751984   | T | C | 0.394  | 0.028 | 1.38E-46 | 204.96 |
| rs7523897  | A | C | 0.133  | 0.024 | 2.77E-08 | 30.78  |
| rs7524019  | T | C | 0.104  | 0.017 | 2.60E-09 | 35.45  |
| rs7548671  | T | C | 0.111  | 0.018 | 3.28E-10 | 39.42  |
| rs75507123 | T | G | -0.143 | 0.026 | 3.94E-08 | 30.19  |
| rs75511781 | A | G | -0.372 | 0.047 | 2.45E-15 | 62.68  |
| rs7576060  | T | C | -0.102 | 0.018 | 2.05E-08 | 31.57  |
| rs7592578  | T | G | -0.200 | 0.022 | 4.71E-19 | 79.56  |
| rs7606205  | A | C | -0.128 | 0.019 | 2.36E-11 | 44.63  |
| rs76073047 | A | G | 0.230  | 0.042 | 2.84E-08 | 30.80  |
| rs7608483  | A | C | 0.117  | 0.018 | 2.83E-11 | 44.27  |
| rs7611674  | T | G | 0.158  | 0.022 | 1.67E-12 | 49.95  |
| rs76164690 | T | G | -0.154 | 0.025 | 7.19E-10 | 37.95  |
| rs7623706  | A | G | 0.098  | 0.018 | 2.84E-08 | 30.69  |
| rs762384   | T | C | 0.151  | 0.021 | 1.97E-13 | 54.26  |
| rs76304369 | T | C | 0.461  | 0.079 | 4.92E-09 | 34.20  |
| rs76326501 | A | C | 0.362  | 0.031 | 2.17E-32 | 140.71 |
| rs76452347 | T | C | -0.225 | 0.023 | 9.37E-23 | 96.19  |
| rs76785130 | A | G | -0.429 | 0.066 | 9.36E-11 | 41.90  |
| rs7694643  | A | G | -0.132 | 0.018 | 3.07E-13 | 53.02  |
| rs76954792 | T | C | 0.121  | 0.021 | 5.06E-09 | 34.01  |
| rs7708525  | T | C | -0.136 | 0.021 | 4.12E-11 | 43.52  |
| rs77151571 | T | C | 0.331  | 0.051 | 8.11E-11 | 42.20  |
| rs7731530  | A | C | 0.136  | 0.019 | 6.41E-13 | 51.46  |
| rs77375686 | A | G | -0.205 | 0.028 | 1.77E-13 | 54.32  |
| rs7753695  | T | C | 0.103  | 0.018 | 4.77E-09 | 34.32  |
| rs7763102  | A | C | 0.112  | 0.020 | 2.61E-08 | 30.99  |

|            |   |   |        |       |          |        |
|------------|---|---|--------|-------|----------|--------|
| rs7788746  | T | G | -0.164 | 0.018 | 3.19E-19 | 80.71  |
| rs77924615 | A | G | -0.316 | 0.022 | 3.72E-45 | 199.39 |
| rs78151625 | T | C | -0.187 | 0.023 | 1.04E-15 | 64.34  |
| rs7817000  | A | C | 0.107  | 0.019 | 1.82E-08 | 31.81  |
| rs78550103 | A | G | -0.181 | 0.025 | 3.48E-13 | 53.01  |
| rs78554005 | T | G | -0.188 | 0.032 | 3.07E-09 | 35.13  |
| rs78648104 | T | C | -0.241 | 0.031 | 8.14E-15 | 60.20  |
| rs786921   | A | G | -0.115 | 0.018 | 8.63E-11 | 42.32  |
| rs78809139 | A | G | -0.228 | 0.029 | 2.58E-15 | 62.73  |
| rs79043825 | A | C | 0.293  | 0.046 | 2.13E-10 | 40.33  |
| rs79208229 | T | G | 0.213  | 0.033 | 6.53E-11 | 42.61  |
| rs7926335  | T | C | 0.180  | 0.020 | 2.05E-20 | 85.59  |
| rs79269465 | T | G | 0.221  | 0.040 | 2.12E-08 | 31.33  |
| rs7927515  | A | C | 0.120  | 0.018 | 5.92E-11 | 42.86  |
| rs7927966  | T | C | -0.153 | 0.020 | 2.85E-14 | 57.67  |
| rs7951348  | T | C | 0.153  | 0.017 | 1.00E-18 | 77.91  |
| rs7959649  | T | C | 0.117  | 0.020 | 8.14E-09 | 33.32  |
| rs7965392  | A | G | 0.112  | 0.018 | 4.16E-10 | 39.01  |
| rs7967705  | T | C | 0.269  | 0.018 | 1.54E-51 | 229.06 |
| rs7977406  | A | G | -0.189 | 0.019 | 1.36E-23 | 99.79  |
| rs79780963 | T | C | -0.503 | 0.032 | 2.89E-54 | 240.73 |
| rs798502   | A | C | -0.109 | 0.019 | 9.65E-09 | 32.79  |
| rs80095680 | A | G | -0.157 | 0.020 | 2.81E-15 | 62.55  |
| rs8014182  | T | C | -0.194 | 0.026 | 3.94E-14 | 57.10  |
| rs8046697  | T | C | -0.129 | 0.018 | 6.10E-13 | 51.86  |
| rs8068773  | T | C | 0.208  | 0.037 | 1.92E-08 | 31.52  |
| rs8108717  | A | G | 0.132  | 0.018 | 1.39E-13 | 54.63  |
| rs8128234  | T | C | 0.117  | 0.021 | 3.97E-08 | 30.28  |
| rs8133022  | A | G | -0.135 | 0.024 | 1.31E-08 | 32.25  |
| rs818508   | T | C | -0.120 | 0.021 | 1.46E-08 | 32.25  |
| rs824522   | A | G | 0.169  | 0.021 | 9.52E-16 | 64.46  |
| rs843078   | A | G | -0.107 | 0.018 | 1.27E-09 | 36.96  |
| rs848309   | T | C | -0.138 | 0.017 | 2.75E-15 | 62.63  |
| rs851966   | A | G | -0.099 | 0.017 | 1.30E-08 | 32.31  |
| rs870448   | T | G | 0.115  | 0.017 | 3.60E-11 | 43.83  |
| rs871606   | T | C | -0.184 | 0.028 | 8.56E-11 | 42.16  |
| rs875106   | A | G | -0.133 | 0.017 | 1.71E-14 | 59.01  |
| rs880315   | T | C | -0.258 | 0.019 | 1.99E-44 | 194.94 |
| rs882624   | T | C | -0.157 | 0.019 | 2.33E-17 | 72.11  |
| rs896312   | T | C | 0.149  | 0.018 | 5.72E-16 | 65.66  |
| rs907612   | T | C | 0.165  | 0.018 | 3.71E-19 | 80.22  |
| rs908951   | T | C | -0.198 | 0.018 | 7.73E-28 | 120.03 |
| rs911547   | A | G | -0.199 | 0.025 | 9.48E-16 | 64.58  |
| rs9286351  | A | G | -0.141 | 0.018 | 1.61E-15 | 63.64  |

|           |   |   |        |       |          |        |
|-----------|---|---|--------|-------|----------|--------|
| rs929698  | A | C | 0.105  | 0.018 | 2.40E-09 | 35.46  |
| rs932316  | T | C | -0.240 | 0.022 | 1.14E-27 | 118.61 |
| rs9326869 | T | C | 0.110  | 0.020 | 3.99E-08 | 30.03  |
| rs9372082 | A | G | -0.137 | 0.022 | 2.77E-10 | 39.98  |
| rs9378123 | A | G | -0.179 | 0.028 | 1.91E-10 | 40.58  |
| rs9386780 | A | G | 0.098  | 0.017 | 1.46E-08 | 32.22  |
| rs9399136 | T | C | 0.117  | 0.020 | 3.77E-09 | 34.86  |
| rs9399437 | A | G | 0.125  | 0.020 | 2.09E-10 | 40.39  |
| rs9401398 | T | C | -0.107 | 0.018 | 1.41E-09 | 36.61  |
| rs9406076 | T | C | 0.101  | 0.019 | 4.65E-08 | 29.81  |
| rs9419374 | A | G | 0.116  | 0.019 | 3.44E-10 | 39.59  |
| rs9431431 | A | G | -0.134 | 0.019 | 1.71E-12 | 49.74  |
| rs9456648 | T | C | -0.117 | 0.019 | 2.76E-10 | 39.72  |
| rs9472135 | T | C | 0.155  | 0.019 | 4.29E-16 | 66.38  |
| rs9478282 | T | C | -0.199 | 0.028 | 8.70E-13 | 51.08  |
| rs9479509 | A | G | -0.115 | 0.019 | 1.21E-09 | 36.76  |
| rs9496614 | T | C | 0.131  | 0.021 | 1.63E-10 | 40.96  |
| rs9508495 | T | C | -0.194 | 0.020 | 1.34E-21 | 90.81  |
| rs9526707 | A | G | -0.122 | 0.019 | 6.59E-11 | 42.81  |
| rs9532101 | A | G | 0.118  | 0.020 | 2.51E-09 | 35.40  |
| rs9532243 | A | C | 0.134  | 0.017 | 1.09E-14 | 59.91  |
| rs954767  | A | C | -0.150 | 0.020 | 4.24E-14 | 57.09  |
| rs9563529 | T | G | 0.122  | 0.022 | 1.38E-08 | 32.30  |
| rs9609429 | T | C | 0.120  | 0.020 | 6.32E-10 | 38.06  |
| rs962369  | T | C | 0.168  | 0.019 | 6.02E-19 | 79.39  |
| rs9638084 | A | G | 0.115  | 0.018 | 8.51E-11 | 42.03  |
| rs9652858 | A | G | 0.136  | 0.023 | 3.45E-09 | 35.02  |
| rs9716164 | T | C | 0.101  | 0.018 | 7.22E-09 | 33.44  |
| rs9787495 | A | G | 0.098  | 0.018 | 2.47E-08 | 31.00  |
| rs983353  | A | G | -0.109 | 0.019 | 8.52E-09 | 32.97  |
| rs9870517 | A | C | 0.145  | 0.018 | 1.88E-16 | 67.48  |
| rs9922726 | A | C | 0.098  | 0.018 | 3.17E-08 | 30.47  |
| rs9932220 | A | G | -0.159 | 0.021 | 3.76E-14 | 57.40  |
| rs9932866 | A | G | 0.115  | 0.018 | 2.90E-10 | 39.77  |
| rs9937801 | T | C | 0.155  | 0.017 | 4.81E-19 | 79.76  |
| rs9939182 | T | C | 0.253  | 0.042 | 1.29E-09 | 36.78  |
| rs994446  | A | G | -0.221 | 0.021 | 6.01E-25 | 106.84 |
| rs9967367 | T | C | 0.140  | 0.019 | 2.04E-13 | 53.80  |

---
