# Supplementary material for: Identifying modifiable risk factors of lung cancer: Indications from Mendelian randomization
Source: PubMed Central journal article supplement (PMC8523078; doi:10.1371/journal.pone.0258498), 2021-10-18
Supplement: pone.0258498.s023.pdf [file pone.0258498.s023.pdf]

**S10 Table: Instrumental variables of SBP.** SNP is the rsID of genetic variants; A1 is the effect allele; A2 is the other allele; beta is the effect size of A1 on the exposure; se is the standard error of beta; pval is the p value of beta; F is the F statistics.

| SNP        | A1 | A2 | beta   | se    | pval     | F      |
|------------|----|----|--------|-------|----------|--------|
| rs1000423  | T  | C  | 0.414  | 0.035 | 6.50E-33 | 143.03 |
| rs10008637 | T  | C  | 0.216  | 0.030 | 9.24E-13 | 51.01  |
| rs10043077 | T  | C  | -0.193 | 0.032 | 2.52E-09 | 35.52  |
| rs10048404 | T  | C  | -0.261 | 0.032 | 1.91E-16 | 67.63  |
| rs10048760 | T  | G  | -0.186 | 0.030 | 6.56E-10 | 38.27  |
| rs1006545  | T  | G  | 0.685  | 0.048 | 3.50E-46 | 203.42 |
| rs10069690 | T  | C  | 0.310  | 0.037 | 4.47E-17 | 70.49  |
| rs10183431 | T  | C  | -0.197 | 0.035 | 2.10E-08 | 31.47  |
| rs10189186 | A  | G  | 0.189  | 0.030 | 3.91E-10 | 39.29  |
| rs1019264  | A  | G  | -0.187 | 0.031 | 2.03E-09 | 36.04  |
| rs10205364 | T  | C  | 0.190  | 0.030 | 2.92E-10 | 39.72  |
| rs10207726 | T  | C  | -0.214 | 0.033 | 8.06E-11 | 42.13  |
| rs10214535 | A  | G  | 0.181  | 0.033 | 3.35E-08 | 30.50  |
| rs10224210 | T  | C  | -0.383 | 0.034 | 1.60E-29 | 126.96 |
| rs10254757 | A  | C  | 0.181  | 0.031 | 4.31E-09 | 34.46  |
| rs10282122 | T  | C  | -0.302 | 0.033 | 2.46E-20 | 85.29  |
| rs1043069  | T  | G  | 0.234  | 0.031 | 5.26E-14 | 56.61  |
| rs10433643 | T  | C  | -0.232 | 0.042 | 3.83E-08 | 30.28  |
| rs10437954 | A  | G  | -0.410 | 0.053 | 1.60E-14 | 58.98  |
| rs1044822  | T  | C  | -0.248 | 0.042 | 5.16E-09 | 34.21  |
| rs10460108 | A  | G  | 0.214  | 0.030 | 1.12E-12 | 50.59  |
| rs10468291 | A  | C  | -0.187 | 0.031 | 9.38E-10 | 37.51  |
| rs1047891  | A  | C  | -0.253 | 0.033 | 1.37E-14 | 59.40  |
| rs10493891 | T  | C  | -0.277 | 0.034 | 1.28E-16 | 68.37  |
| rs10501410 | A  | G  | 0.412  | 0.061 | 1.10E-11 | 46.11  |
| rs1052501  | T  | C  | 0.226  | 0.041 | 4.14E-08 | 30.14  |
| rs10743348 | T  | C  | 0.292  | 0.034 | 1.06E-17 | 73.51  |
| rs10746963 | A  | G  | -0.218 | 0.039 | 2.05E-08 | 31.48  |
| rs10761530 | T  | C  | 0.200  | 0.030 | 2.54E-11 | 44.62  |
| rs1076485  | T  | C  | 0.339  | 0.046 | 1.19E-13 | 54.96  |
| rs10776752 | T  | G  | 0.821  | 0.058 | 4.61E-46 | 203.21 |
| rs10782230 | A  | G  | 0.211  | 0.030 | 2.91E-12 | 48.63  |
| rs10820855 | T  | C  | -0.190 | 0.033 | 1.05E-08 | 32.65  |
| rs10832013 | T  | G  | 0.190  | 0.033 | 5.88E-09 | 33.97  |
| rs10835148 | A  | G  | 0.192  | 0.031 | 8.69E-10 | 37.63  |
| rs10841520 | T  | C  | -0.249 | 0.038 | 4.97E-11 | 43.16  |
| rs10875907 | A  | G  | -0.716 | 0.122 | 4.28E-09 | 34.48  |
| rs10895025 | T  | C  | 0.188  | 0.032 | 3.63E-09 | 34.81  |
| rs10950289 | A  | G  | 0.234  | 0.041 | 1.52E-08 | 32.05  |

|             |   |   |        |       |          |        |
|-------------|---|---|--------|-------|----------|--------|
| rs10980408  | T | C | -0.761 | 0.083 | 3.83E-20 | 84.59  |
| rs1098708   | A | G | -0.197 | 0.030 | 8.21E-11 | 42.23  |
| rs11031051  | A | C | -0.224 | 0.033 | 7.73E-12 | 46.84  |
| rs11044793  | T | C | 0.299  | 0.052 | 1.05E-08 | 32.71  |
| rs11074093  | T | C | -0.192 | 0.031 | 4.58E-10 | 38.77  |
| rs11120093  | T | C | -0.179 | 0.031 | 5.13E-09 | 34.07  |
| rs111230791 | T | C | -0.478 | 0.039 | 5.17E-35 | 152.81 |
| rs1113480   | A | C | 0.215  | 0.034 | 1.50E-10 | 41.15  |
| rs11145807  | A | G | 0.214  | 0.032 | 3.54E-11 | 43.96  |
| rs11159091  | A | G | 0.198  | 0.030 | 6.79E-11 | 42.62  |
| rs11168250  | T | G | -0.279 | 0.036 | 5.40E-15 | 61.21  |
| rs11191580  | T | C | 1.100  | 0.055 | 7.74E-89 | 399.64 |
| rs11196549  | A | G | 0.688  | 0.078 | 1.58E-18 | 77.10  |
| rs11197813  | A | G | -0.182 | 0.033 | 3.53E-08 | 30.42  |
| rs11210029  | A | G | -0.203 | 0.031 | 8.92E-11 | 42.06  |
| rs112260610 | T | C | 0.259  | 0.044 | 2.69E-09 | 35.40  |
| rs11229115  | A | G | -0.260 | 0.036 | 4.98E-13 | 52.08  |
| rs11252324  | T | G | -0.416 | 0.057 | 3.61E-13 | 52.81  |
| rs11257593  | A | G | 0.176  | 0.031 | 8.55E-09 | 33.19  |
| rs113006694 | A | G | -0.381 | 0.066 | 7.76E-09 | 33.32  |
| rs113086489 | T | C | 0.325  | 0.031 | 3.80E-26 | 112.00 |
| rs1133400   | A | G | -0.298 | 0.038 | 2.53E-15 | 62.60  |
| rs114472600 | T | C | -0.465 | 0.077 | 1.30E-09 | 36.82  |
| rs1154214   | T | G | -0.203 | 0.031 | 3.27E-11 | 44.05  |
| rs11579440  | T | C | 0.267  | 0.043 | 3.24E-10 | 39.59  |
| rs11592107  | A | G | 0.302  | 0.033 | 1.55E-20 | 86.05  |
| rs11604310  | T | C | -0.278 | 0.041 | 1.46E-11 | 45.69  |
| rs11623535  | A | G | 0.210  | 0.034 | 1.02E-09 | 37.31  |
| rs11629850  | A | G | 0.230  | 0.030 | 2.26E-14 | 58.24  |
| rs11636952  | T | C | 0.531  | 0.033 | 4.22E-59 | 262.38 |
| rs11638     | A | G | -0.232 | 0.030 | 2.43E-14 | 58.29  |
| rs11641374  | A | C | -0.194 | 0.031 | 3.26E-10 | 39.54  |
| rs11650511  | T | C | 0.243  | 0.031 | 1.07E-14 | 59.94  |
| rs11655604  | T | C | -0.203 | 0.033 | 1.09E-09 | 37.27  |
| rs11685352  | A | G | -0.227 | 0.039 | 6.14E-09 | 33.76  |
| rs11689667  | T | C | 0.198  | 0.030 | 6.66E-11 | 42.55  |
| rs11690717  | T | G | -0.202 | 0.032 | 1.93E-10 | 40.61  |
| rs117206641 | T | C | 0.315  | 0.050 | 2.66E-10 | 39.95  |
| rs117464403 | A | G | 0.864  | 0.120 | 5.80E-13 | 51.93  |
| rs1177701   | A | G | 0.172  | 0.030 | 1.54E-08 | 32.07  |
| rs11862847  | A | G | -0.168 | 0.030 | 2.29E-08 | 31.26  |
| rs11868035  | A | G | 0.187  | 0.033 | 1.76E-08 | 31.79  |
| rs11872627  | T | C | -0.295 | 0.044 | 1.34E-11 | 45.66  |
| rs11874246  | T | C | 0.286  | 0.033 | 3.23E-18 | 75.82  |

|            |   |   |        |       |          |        |
|------------|---|---|--------|-------|----------|--------|
| rs11876341 | A | G | -0.213 | 0.033 | 1.82E-10 | 40.67  |
| rs11960210 | T | C | 0.473  | 0.031 | 1.25E-51 | 228.08 |
| rs11972067 | A | G | -0.179 | 0.033 | 3.92E-08 | 30.12  |
| rs11972506 | T | C | -0.179 | 0.032 | 1.80E-08 | 31.74  |
| rs11977526 | A | G | -0.321 | 0.031 | 6.62E-25 | 106.05 |
| rs11983200 | A | G | -0.297 | 0.051 | 7.20E-09 | 33.54  |
| rs11983783 | T | C | 0.176  | 0.031 | 9.48E-09 | 32.93  |
| rs12042924 | T | C | -0.181 | 0.030 | 2.62E-09 | 35.57  |
| rs12050196 | T | C | 0.213  | 0.031 | 6.31E-12 | 47.12  |
| rs12136922 | A | G | 0.203  | 0.030 | 2.69E-11 | 44.46  |
| rs12146652 | A | C | -0.358 | 0.031 | 9.00E-31 | 133.14 |
| rs12147633 | T | C | -0.538 | 0.090 | 2.60E-09 | 35.50  |
| rs12149704 | A | G | 0.588  | 0.068 | 8.57E-18 | 73.82  |
| rs12153395 | A | G | -0.330 | 0.049 | 1.07E-11 | 46.19  |
| rs1215469  | A | C | -0.212 | 0.037 | 6.16E-09 | 33.86  |
| rs12192157 | T | C | 0.185  | 0.032 | 4.43E-09 | 34.34  |
| rs1229984  | T | C | -0.599 | 0.090 | 2.42E-11 | 44.58  |
| rs12363917 | T | C | 0.200  | 0.034 | 2.49E-09 | 35.61  |
| rs12368199 | A | G | -0.234 | 0.042 | 3.18E-08 | 30.55  |
| rs12426261 | A | G | 0.378  | 0.031 | 2.31E-34 | 149.25 |
| rs12446456 | T | C | -0.300 | 0.030 | 2.97E-23 | 98.88  |
| rs12454712 | T | C | 0.191  | 0.033 | 5.82E-09 | 33.84  |
| rs12462548 | A | G | 0.332  | 0.040 | 7.20E-17 | 69.77  |
| rs12509595 | T | C | -0.837 | 0.033 | 2.55E-   | 627.55 |

138

|            |   |   |        |       |          |        |
|------------|---|---|--------|-------|----------|--------|
| rs12511987 | T | G | -0.233 | 0.040 | 5.39E-09 | 34.07  |
| rs12528975 | A | G | 0.475  | 0.075 | 1.98E-10 | 40.45  |
| rs12627651 | A | G | 0.350  | 0.034 | 1.02E-24 | 105.23 |
| rs12630450 | A | G | 0.289  | 0.035 | 7.74E-17 | 69.57  |
| rs12637573 | A | G | -0.173 | 0.030 | 9.95E-09 | 32.85  |
| rs12643599 | A | G | 0.313  | 0.031 | 1.23E-23 | 100.26 |
| rs12656497 | T | C | -0.638 | 0.031 | 7.14E-96 | 432.15 |
| rs12657950 | T | C | 0.455  | 0.059 | 1.27E-14 | 59.47  |
| rs12661036 | T | C | -0.210 | 0.037 | 1.82E-08 | 31.65  |
| rs12661604 | A | G | 0.178  | 0.031 | 9.87E-09 | 32.82  |
| rs12664016 | A | G | -0.316 | 0.057 | 2.83E-08 | 30.81  |
| rs12668436 | T | C | -0.215 | 0.035 | 7.88E-10 | 37.77  |
| rs12692738 | T | C | 0.204  | 0.036 | 1.37E-08 | 32.32  |
| rs12693095 | T | G | -0.182 | 0.032 | 1.50E-08 | 32.11  |
| rs12693982 | T | C | 0.258  | 0.031 | 7.49E-17 | 69.44  |
| rs12731646 | T | C | -0.189 | 0.031 | 7.21E-10 | 37.90  |
| rs1275988  | T | C | -0.541 | 0.031 | 4.42E-69 | 308.53 |
| rs12901664 | T | C | 0.182  | 0.032 | 9.60E-09 | 32.86  |
| rs12906962 | T | C | -0.265 | 0.033 | 3.28E-16 | 66.64  |

|             |   |   |        |       |          |        |
|-------------|---|---|--------|-------|----------|--------|
| rs1290784   | T | C | 0.412  | 0.030 | 2.97E-42 | 185.25 |
| rs1290933   | A | C | -0.285 | 0.033 | 3.17E-18 | 75.80  |
| rs1293965   | A | G | -0.200 | 0.035 | 9.83E-09 | 32.93  |
| rs12971628  | T | G | -0.254 | 0.032 | 4.17E-15 | 61.64  |
| rs12982630  | A | C | -0.251 | 0.035 | 1.38E-12 | 50.19  |
| rs13015703  | T | C | 0.208  | 0.034 | 1.45E-09 | 36.67  |
| rs13016772  | T | C | 0.252  | 0.036 | 1.23E-12 | 50.47  |
| rs13095509  | T | C | 0.859  | 0.107 | 7.98E-16 | 64.86  |
| rs13107261  | A | G | -0.178 | 0.031 | 1.57E-08 | 32.06  |
| rs13107325  | T | C | -0.909 | 0.059 | 4.22E-53 | 235.56 |
| rs13128814  | A | G | -0.217 | 0.031 | 1.24E-12 | 50.48  |
| rs13143677  | A | G | 0.224  | 0.033 | 1.82E-11 | 45.13  |
| rs13149209  | T | C | 0.281  | 0.037 | 1.97E-14 | 58.62  |
| rs13165038  | T | C | -0.192 | 0.032 | 3.32E-09 | 35.01  |
| rs13179413  | T | C | 0.224  | 0.035 | 1.08E-10 | 41.60  |
| rs13203975  | A | G | 0.279  | 0.048 | 4.46E-09 | 34.43  |
| rs13207962  | A | G | -0.250 | 0.036 | 1.78E-12 | 49.75  |
| rs13227860  | A | G | 0.222  | 0.035 | 1.44E-10 | 41.04  |
| rs13253358  | T | C | 0.213  | 0.033 | 1.13E-10 | 41.54  |
| rs13290326  | T | C | -0.212 | 0.030 | 1.52E-12 | 50.03  |
| rs1331012   | T | G | 0.204  | 0.034 | 1.49E-09 | 36.53  |
| rs1332813   | T | C | 0.220  | 0.031 | 2.32E-12 | 49.22  |
| rs13358657  | A | G | -0.388 | 0.045 | 2.95E-18 | 76.02  |
| rs13383272  | A | G | -0.172 | 0.031 | 1.74E-08 | 31.80  |
| rs13412750  | A | G | -0.289 | 0.034 | 2.33E-17 | 71.78  |
| rs1347345   | A | G | -0.181 | 0.031 | 6.92E-09 | 33.51  |
| rs1368298   | A | G | 0.309  | 0.031 | 4.76E-24 | 102.31 |
| rs1375564   | T | C | 0.258  | 0.032 | 2.84E-16 | 67.03  |
| rs137923903 | T | C | -1.280 | 0.146 | 2.25E-18 | 76.49  |
| rs1379617   | T | C | 0.217  | 0.036 | 1.54E-09 | 36.44  |
| rs1408945   | T | G | -0.320 | 0.030 | 8.33E-26 | 110.53 |
| rs141212865 | A | C | 0.301  | 0.039 | 7.68E-15 | 60.49  |
| rs1421203   | T | C | -0.350 | 0.040 | 7.86E-19 | 78.47  |
| rs142449193 | T | C | -0.455 | 0.074 | 7.86E-10 | 37.79  |
| rs1432564   | T | C | -0.175 | 0.030 | 7.52E-09 | 33.29  |
| rs143285018 | A | G | 0.865  | 0.124 | 2.88E-12 | 48.79  |
| rs1433121   | T | C | -0.228 | 0.033 | 2.66E-12 | 48.91  |
| rs143333049 | A | G | -0.542 | 0.087 | 4.13E-10 | 39.05  |
| rs1436138   | A | G | 0.312  | 0.032 | 4.73E-23 | 98.04  |
| rs144311783 | T | C | 0.493  | 0.086 | 8.13E-09 | 33.21  |
| rs145042302 | A | G | -0.589 | 0.097 | 1.39E-09 | 36.67  |
| rs145211473 | A | G | 0.751  | 0.112 | 1.86E-11 | 45.08  |
| rs1465091   | A | C | -0.361 | 0.039 | 1.75E-20 | 85.88  |
| rs1474698   | T | C | -0.177 | 0.031 | 6.73E-09 | 33.56  |

|             |   |   |        |       |          |        |
|-------------|---|---|--------|-------|----------|--------|
| rs148140538 | T | C | -0.325 | 0.056 | 7.39E-09 | 33.48  |
| rs1486236   | A | C | -0.234 | 0.032 | 2.96E-13 | 53.09  |
| rs149487184 | T | C | -0.634 | 0.105 | 1.46E-09 | 36.59  |
| rs151117229 | T | C | 0.612  | 0.081 | 3.14E-14 | 57.70  |
| rs1514086   | A | G | -0.433 | 0.059 | 2.95E-13 | 53.24  |
| rs1536608   | T | G | 0.194  | 0.030 | 1.57E-10 | 41.04  |
| rs1551355   | T | C | 0.210  | 0.036 | 3.89E-09 | 34.73  |
| rs1565440   | A | G | 0.175  | 0.031 | 1.94E-08 | 31.52  |
| rs157079    | T | C | 0.924  | 0.149 | 5.83E-10 | 38.37  |
| rs1575290   | T | C | 0.197  | 0.030 | 5.59E-11 | 42.97  |
| rs1624823   | A | G | 0.337  | 0.031 | 4.26E-27 | 115.99 |
| rs1630736   | T | C | -0.171 | 0.031 | 3.52E-08 | 30.48  |
| rs1657880   | T | C | -0.287 | 0.050 | 7.44E-09 | 33.39  |
| rs167479    | T | G | -0.564 | 0.033 | 7.21E-67 | 297.69 |
| rs1688790   | A | G | -0.170 | 0.030 | 1.87E-08 | 31.72  |
| rs16939357  | T | C | 0.311  | 0.042 | 1.37E-13 | 54.71  |
| rs17010957  | T | C | -0.534 | 0.043 | 1.78E-35 | 154.22 |
| rs17035181  | T | G | 0.307  | 0.043 | 7.61E-13 | 51.34  |
| rs17115145  | T | C | 0.178  | 0.031 | 7.39E-09 | 33.43  |
| rs17171710  | T | C | -0.409 | 0.049 | 1.13E-16 | 68.69  |
| rs17245822  | A | C | -0.190 | 0.031 | 1.15E-09 | 37.05  |
| rs17249754  | A | G | -0.845 | 0.040 | 1.25E-97 | 439.23 |
| rs17257081  | A | G | 0.227  | 0.039 | 6.35E-09 | 33.65  |
| rs17376426  | T | C | 0.676  | 0.087 | 9.87E-15 | 59.87  |
| rs17473424  | A | G | 0.531  | 0.050 | 1.25E-26 | 114.24 |
| rs17608766  | T | C | -0.690 | 0.043 | 2.48E-57 | 254.16 |
| rs17638167  | T | C | -0.452 | 0.074 | 1.07E-09 | 37.19  |
| rs17730281  | A | G | -0.200 | 0.036 | 2.38E-08 | 31.18  |
| rs17760259  | T | C | -0.265 | 0.030 | 2.25E-18 | 76.22  |
| rs17778035  | T | C | -0.241 | 0.044 | 3.94E-08 | 30.20  |
| rs17812022  | T | C | -0.361 | 0.053 | 5.65E-12 | 47.36  |
| rs17826049  | T | G | -0.621 | 0.077 | 1.09E-15 | 64.33  |
| rs1790998   | A | C | -0.209 | 0.031 | 9.10E-12 | 46.52  |
| rs179972    | T | C | 0.183  | 0.031 | 5.46E-09 | 33.93  |
| rs1808192   | A | G | -0.184 | 0.032 | 1.38E-08 | 32.32  |
| rs1815614   | A | G | 0.235  | 0.031 | 3.73E-14 | 57.37  |
| rs182050989 | T | C | 0.580  | 0.088 | 3.87E-11 | 43.72  |
| rs1848510   | A | G | 0.184  | 0.032 | 5.72E-09 | 33.87  |
| rs1848994   | A | G | 0.201  | 0.033 | 1.79E-09 | 36.29  |
| rs1871190   | T | G | 0.195  | 0.032 | 1.66E-09 | 36.37  |
| rs1879057   | T | C | -0.325 | 0.038 | 1.67E-17 | 72.43  |
| rs1882961   | T | C | 0.244  | 0.033 | 6.69E-14 | 56.16  |
| rs1888693   | A | G | 0.386  | 0.032 | 4.69E-34 | 148.12 |
| rs1891392   | T | C | 0.228  | 0.033 | 9.02E-12 | 46.44  |

|           |   |   |        |       |          |        |
|-----------|---|---|--------|-------|----------|--------|
| rs1891730 | T | C | -0.181 | 0.031 | 7.74E-09 | 33.30  |
| rs1906672 | A | G | 0.297  | 0.036 | 1.20E-16 | 68.64  |
| rs1921151 | A | G | 0.300  | 0.038 | 1.27E-15 | 64.00  |
| rs1957563 | T | C | 0.363  | 0.034 | 2.32E-26 | 112.60 |
| rs1960024 | A | G | 0.187  | 0.031 | 2.00E-09 | 36.04  |
| rs1984195 | A | G | 0.241  | 0.030 | 1.77E-15 | 63.21  |
| rs1998107 | A | G | -0.190 | 0.030 | 2.23E-10 | 40.28  |
| rs2007361 | A | G | -0.194 | 0.032 | 8.69E-10 | 37.61  |
| rs2009598 | A | G | 0.222  | 0.031 | 4.61E-13 | 52.34  |
| rs2014408 | T | C | 0.517  | 0.037 | 1.26E-43 | 192.04 |
| rs2032451 | T | G | 0.543  | 0.042 | 1.56E-37 | 163.71 |
| rs2054479 | T | G | -0.265 | 0.034 | 3.02E-15 | 62.34  |
| rs2060664 | T | C | 0.216  | 0.035 | 4.06E-10 | 39.20  |
| rs2065498 | T | G | -0.293 | 0.040 | 3.36E-13 | 53.00  |
| rs2071287 | T | C | 0.299  | 0.032 | 8.90E-21 | 87.25  |
| rs2093324 | A | G | -0.180 | 0.031 | 9.75E-09 | 32.90  |
| rs2098839 | T | C | 0.199  | 0.032 | 4.92E-10 | 38.72  |
| rs2105388 | A | C | 0.178  | 0.031 | 5.70E-09 | 34.02  |
| rs2107595 | A | G | 0.418  | 0.042 | 7.37E-24 | 101.26 |
| rs2112453 | A | G | -0.188 | 0.034 | 3.69E-08 | 30.27  |
| rs2126474 | T | G | -0.260 | 0.031 | 1.87E-17 | 72.25  |
| rs2131957 | A | C | -0.206 | 0.031 | 1.98E-11 | 44.94  |
| rs2156805 | A | G | 0.178  | 0.030 | 4.64E-09 | 34.32  |
| rs2161967 | T | G | 0.284  | 0.031 | 2.87E-20 | 85.34  |
| rs2177843 | T | C | 0.439  | 0.043 | 2.80E-24 | 103.46 |
| rs2206815 | A | C | -0.327 | 0.030 | 5.52E-27 | 115.56 |
| rs2210893 | T | C | -0.190 | 0.033 | 4.73E-09 | 34.21  |
| rs2236295 | T | G | -0.303 | 0.031 | 1.05E-22 | 96.03  |
| rs2238787 | A | G | 0.255  | 0.033 | 1.45E-14 | 59.09  |
| rs2239046 | A | G | 0.208  | 0.032 | 9.58E-11 | 41.81  |
| rs2240365 | T | C | 0.419  | 0.069 | 1.33E-09 | 36.82  |
| rs2246754 | T | C | 0.250  | 0.037 | 1.17E-11 | 46.08  |
| rs2249105 | A | G | 0.293  | 0.031 | 7.63E-21 | 87.45  |
| rs2273171 | T | C | -0.167 | 0.030 | 2.64E-08 | 30.91  |
| rs227426  | T | G | 0.186  | 0.030 | 8.59E-10 | 37.68  |
| rs2289124 | A | G | -0.308 | 0.042 | 1.14E-13 | 55.08  |
| rs2290263 | A | G | 0.268  | 0.035 | 3.11E-14 | 57.77  |
| rs2291434 | T | G | -0.262 | 0.030 | 5.10E-18 | 74.88  |
| rs2297387 | A | G | -0.173 | 0.032 | 4.56E-08 | 29.94  |
| rs2300481 | T | C | 0.198  | 0.031 | 1.56E-10 | 40.84  |
| rs2302263 | T | C | 0.326  | 0.054 | 1.07E-09 | 37.22  |
| rs2306363 | T | G | -0.436 | 0.038 | 5.24E-31 | 134.34 |
| rs2327429 | T | C | 0.200  | 0.034 | 3.16E-09 | 35.01  |
| rs2354862 | A | C | 0.251  | 0.032 | 2.42E-15 | 62.54  |

|            |   |   |        |       |          |        |
|------------|---|---|--------|-------|----------|--------|
| rs2357945  | A | G | -0.307 | 0.048 | 1.71E-10 | 40.84  |
| rs2384063  | T | C | 0.327  | 0.036 | 6.33E-20 | 83.69  |
| rs2392929  | T | G | -0.751 | 0.038 | 1.96E-87 | 392.33 |
| rs2395622  | T | C | -0.227 | 0.039 | 7.17E-09 | 33.42  |
| rs2417189  | T | G | 0.243  | 0.031 | 1.03E-14 | 59.84  |
| rs2419077  | T | G | 0.197  | 0.034 | 1.07E-08 | 32.66  |
| rs246973   | T | C | 0.248  | 0.034 | 1.45E-13 | 54.76  |
| rs2470004  | T | C | -0.345 | 0.039 | 1.28E-18 | 77.64  |
| rs2480171  | T | C | 0.291  | 0.047 | 4.69E-10 | 38.80  |
| rs2493291  | T | C | 0.421  | 0.044 | 1.85E-21 | 90.64  |
| rs2498323  | A | G | 0.317  | 0.052 | 8.52E-10 | 37.62  |
| rs2549732  | A | G | -0.455 | 0.059 | 1.27E-14 | 59.39  |
| rs256741   | A | C | 0.168  | 0.031 | 4.50E-08 | 29.96  |
| rs2596498  | T | C | -0.233 | 0.034 | 4.90E-12 | 47.80  |
| rs2608882  | A | G | -0.252 | 0.036 | 3.43E-12 | 48.54  |
| rs2610990  | A | G | -0.290 | 0.034 | 2.86E-17 | 71.63  |
| rs2611774  | A | G | 0.219  | 0.032 | 6.85E-12 | 46.97  |
| rs2613765  | A | G | -0.235 | 0.030 | 5.32E-15 | 61.11  |
| rs2627316  | A | G | -0.333 | 0.030 | 2.79E-28 | 121.36 |
| rs262986   | A | G | -0.237 | 0.031 | 7.67E-15 | 60.43  |
| rs2643826  | T | C | 0.447  | 0.031 | 1.74E-48 | 213.68 |
| rs2652812  | T | C | -0.252 | 0.035 | 1.03E-12 | 50.80  |
| rs267517   | A | G | -0.261 | 0.031 | 7.18E-17 | 69.53  |
| rs2693560  | A | G | -0.206 | 0.032 | 6.99E-11 | 42.50  |
| rs2724377  | A | G | 0.194  | 0.030 | 1.29E-10 | 41.45  |
| rs2744133  | A | G | 0.288  | 0.034 | 1.33E-17 | 72.98  |
| rs2745599  | A | G | 0.216  | 0.032 | 8.96E-12 | 46.60  |
| rs2753960  | T | G | 0.447  | 0.031 | 2.66E-47 | 208.89 |
| rs2801008  | T | G | -0.188 | 0.032 | 7.37E-09 | 33.53  |
| rs2807337  | T | C | 0.186  | 0.031 | 2.78E-09 | 35.24  |
| rs2815063  | A | C | 0.276  | 0.046 | 1.76E-09 | 36.18  |
| rs2833834  | A | C | 0.218  | 0.034 | 1.22E-10 | 41.48  |
| rs28558491 | T | C | -0.211 | 0.034 | 7.54E-10 | 37.99  |
| rs28572127 | A | C | -0.178 | 0.032 | 3.51E-08 | 30.40  |
| rs28572357 | A | C | -0.273 | 0.031 | 6.34E-19 | 78.74  |
| rs28578714 | T | C | 0.207  | 0.033 | 2.53E-10 | 39.92  |
| rs28621435 | A | G | -0.298 | 0.048 | 6.47E-10 | 38.12  |
| rs2869668  | T | C | 0.174  | 0.030 | 6.92E-09 | 33.53  |
| rs28708888 | A | C | -0.207 | 0.032 | 1.50E-10 | 41.17  |
| rs2872717  | T | C | -0.265 | 0.036 | 1.01E-13 | 55.20  |
| rs28730765 | T | C | 0.815  | 0.141 | 7.78E-09 | 33.35  |
| rs28866311 | T | G | -0.276 | 0.030 | 5.45E-20 | 83.64  |
| rs2892987  | A | G | 0.322  | 0.054 | 2.95E-09 | 35.23  |
| rs2913920  | T | C | 0.242  | 0.036 | 1.62E-11 | 45.37  |

|            |   |   |        |       |          |        |
|------------|---|---|--------|-------|----------|--------|
| rs2943648  | A | G | -0.256 | 0.031 | 2.61E-16 | 67.00  |
| rs2957468  | A | G | 0.247  | 0.032 | 1.59E-14 | 58.98  |
| rs296797   | T | C | 0.216  | 0.031 | 2.16E-12 | 49.23  |
| rs2978098  | A | C | 0.223  | 0.031 | 3.78E-13 | 52.62  |
| rs2978456  | T | C | -0.180 | 0.031 | 8.95E-09 | 33.00  |
| rs2999159  | A | G | -0.435 | 0.040 | 1.96E-27 | 117.89 |
| rs3058639  | T | C | -0.189 | 0.034 | 1.68E-08 | 31.80  |
| rs307359   | A | G | -0.379 | 0.065 | 5.18E-09 | 34.14  |
| rs3098186  | T | C | -0.242 | 0.030 | 1.41E-15 | 63.89  |
| rs3128334  | A | G | 0.207  | 0.032 | 1.41E-10 | 41.07  |
| rs314779   | T | G | -0.212 | 0.033 | 1.79E-10 | 40.66  |
| rs33996239 | T | C | -0.366 | 0.066 | 3.39E-08 | 30.48  |
| rs34025993 | A | G | 0.223  | 0.031 | 4.71E-13 | 52.42  |
| rs34072724 | A | G | -0.242 | 0.030 | 1.37E-15 | 63.89  |
| rs34130368 | T | G | -0.302 | 0.050 | 1.28E-09 | 36.83  |
| rs342130   | A | G | 0.189  | 0.031 | 1.34E-09 | 36.78  |
| rs34297584 | A | G | 0.795  | 0.113 | 2.13E-12 | 49.38  |
| rs34475503 | A | G | -0.379 | 0.054 | 1.31E-12 | 50.26  |
| rs34518929 | A | G | -0.220 | 0.035 | 1.79E-10 | 40.66  |
| rs34587622 | T | C | -0.329 | 0.051 | 1.67E-10 | 40.90  |
| rs34727427 | T | C | -0.235 | 0.032 | 4.02E-13 | 52.74  |
| rs34869093 | A | G | -0.220 | 0.031 | 1.84E-12 | 49.59  |
| rs34905952 | A | G | 0.287  | 0.041 | 3.00E-12 | 48.73  |
| rs34941092 | A | G | -0.323 | 0.043 | 3.23E-14 | 57.58  |
| rs34983854 | A | G | -0.206 | 0.031 | 2.06E-11 | 44.85  |
| rs34991912 | T | C | 0.311  | 0.031 | 3.98E-24 | 102.69 |
| rs35213536 | T | G | 0.294  | 0.036 | 1.94E-16 | 67.68  |
| rs35413927 | A | G | -0.300 | 0.033 | 5.25E-20 | 83.77  |
| rs35444    | A | G | 0.437  | 0.031 | 3.47E-45 | 198.54 |
| rs35519679 | A | G | 0.254  | 0.036 | 1.15E-12 | 50.46  |
| rs35680304 | T | C | 0.269  | 0.031 | 3.76E-18 | 75.52  |
| rs35754956 | A | G | -0.290 | 0.048 | 1.08E-09 | 37.12  |
| rs35783704 | A | G | -0.462 | 0.051 | 8.81E-20 | 83.00  |
| rs360151   | A | G | 0.327  | 0.052 | 2.16E-10 | 40.27  |
| rs36027301 | T | C | -0.422 | 0.067 | 2.99E-10 | 39.70  |
| rs365990   | A | G | 0.225  | 0.031 | 5.95E-13 | 52.01  |
| rs366590   | A | G | 0.219  | 0.033 | 2.10E-11 | 44.92  |
| rs3729931  | A | G | -0.182 | 0.031 | 6.29E-09 | 33.71  |
| rs3735533  | T | C | -0.910 | 0.058 | 5.29E-56 | 248.73 |
| rs3743157  | A | C | 0.293  | 0.040 | 4.20E-13 | 52.60  |
| rs3754944  | A | C | 0.177  | 0.031 | 9.30E-09 | 32.95  |
| rs3757387  | T | C | 0.190  | 0.030 | 4.01E-10 | 39.23  |
| rs3763917  | A | C | 0.212  | 0.038 | 1.82E-08 | 31.73  |
| rs3772219  | A | C | 0.273  | 0.032 | 3.10E-17 | 71.15  |



|            |   |   |        |       |          |        |
|------------|---|---|--------|-------|----------|--------|
| rs3807925  | A | G | -0.186 | 0.032 | 5.39E-09 | 33.96  |
| rs3808356  | T | C | 0.197  | 0.034 | 4.91E-09 | 34.31  |
| rs3821843  | A | G | 0.337  | 0.034 | 6.56E-24 | 101.38 |
| rs3827676  | T | C | 0.175  | 0.031 | 1.17E-08 | 32.42  |
| rs3843712  | T | C | -0.340 | 0.051 | 1.91E-11 | 45.12  |
| rs3847320  | A | G | -0.191 | 0.034 | 2.82E-08 | 30.83  |
| rs3860770  | A | G | -0.266 | 0.033 | 1.20E-15 | 63.95  |
| rs3894010  | T | G | -0.201 | 0.031 | 5.12E-11 | 42.99  |
| rs3910508  | A | G | 0.261  | 0.032 | 1.38E-16 | 68.38  |
| rs3915499  | A | G | -0.207 | 0.032 | 1.36E-10 | 41.13  |
| rs3918226  | T | C | 0.664  | 0.058 | 8.46E-31 | 133.35 |
| rs3923060  | T | C | 0.192  | 0.035 | 3.64E-08 | 30.34  |
| rs3980686  | T | G | -0.500 | 0.049 | 1.03E-24 | 105.33 |
| rs41267086 | A | G | 0.505  | 0.069 | 3.41E-13 | 52.99  |
| rs4129585  | A | C | 0.186  | 0.031 | 1.03E-09 | 37.27  |
| rs4143175  | T | C | 0.219  | 0.035 | 5.10E-10 | 38.60  |
| rs42377    | A | G | -0.315 | 0.033 | 1.69E-21 | 90.74  |
| rs4245165  | T | C | -0.225 | 0.036 | 2.39E-10 | 40.09  |
| rs4245599  | A | G | -0.179 | 0.031 | 4.04E-09 | 34.60  |
| rs4245930  | A | G | -0.202 | 0.031 | 1.04E-10 | 41.73  |
| rs4286632  | A | G | 0.211  | 0.034 | 7.64E-10 | 37.84  |
| rs4319878  | T | C | 0.169  | 0.031 | 3.77E-08 | 30.25  |
| rs4320727  | A | G | 0.234  | 0.031 | 9.89E-14 | 55.44  |
| rs4440615  | A | G | -0.220 | 0.031 | 1.87E-12 | 49.77  |
| rs4456714  | T | C | -0.191 | 0.035 | 3.24E-08 | 30.54  |
| rs4480845  | T | C | 0.316  | 0.032 | 1.85E-23 | 99.75  |
| rs4496141  | T | G | 0.180  | 0.030 | 2.28E-09 | 35.64  |
| rs4511593  | T | C | -0.288 | 0.032 | 1.28E-19 | 82.08  |
| rs4553000  | T | C | -0.204 | 0.030 | 1.09E-11 | 46.01  |
| rs4573493  | T | C | 0.167  | 0.030 | 3.86E-08 | 30.30  |
| rs4577304  | T | C | -0.177 | 0.030 | 4.99E-09 | 34.23  |
| rs4582532  | A | G | -0.200 | 0.030 | 3.64E-11 | 43.70  |
| rs4595370  | A | G | -0.209 | 0.033 | 1.73E-10 | 40.68  |
| rs4598218  | T | C | 0.191  | 0.031 | 1.00E-09 | 37.28  |
| rs464605   | T | C | 0.208  | 0.035 | 2.08E-09 | 35.83  |
| rs4651224  | T | C | 0.199  | 0.031 | 9.00E-11 | 42.12  |
| rs4696128  | T | C | -0.170 | 0.031 | 2.78E-08 | 30.83  |
| rs4704514  | T | C | 0.273  | 0.034 | 3.92E-16 | 66.16  |
| rs4738141  | A | G | -0.193 | 0.035 | 3.12E-08 | 30.55  |
| rs4754196  | A | G | -0.349 | 0.030 | 1.46E-30 | 132.36 |
| rs4760701  | A | G | -0.293 | 0.037 | 1.95E-15 | 63.14  |
| rs4775769  | T | G | -0.416 | 0.052 | 7.76E-16 | 64.81  |
| rs4793069  | A | G | 0.374  | 0.066 | 1.67E-08 | 31.86  |
| rs4812536  | A | G | 0.271  | 0.032 | 4.09E-17 | 70.60  |

|            |   |   |        |       |          |        |
|------------|---|---|--------|-------|----------|--------|
| rs4818833  | A | G | -0.226 | 0.031 | 2.39E-13 | 53.68  |
| rs4864421  | T | C | -0.217 | 0.031 | 2.14E-12 | 49.50  |
| rs4873492  | T | C | 0.343  | 0.040 | 1.61E-17 | 72.48  |
| rs4875958  | A | G | 0.226  | 0.034 | 1.85E-11 | 45.08  |
| rs4888408  | A | G | 0.365  | 0.031 | 1.42E-32 | 141.59 |
| rs4908348  | T | G | 0.237  | 0.033 | 8.07E-13 | 51.40  |
| rs4925159  | A | G | 0.217  | 0.031 | 9.66E-13 | 50.81  |
| rs4926923  | T | C | 0.320  | 0.054 | 2.56E-09 | 35.49  |
| rs4932373  | A | C | -0.635 | 0.033 | 2.49E-83 | 374.80 |
| rs4948643  | T | C | 0.226  | 0.034 | 2.40E-11 | 44.63  |
| rs4952668  | A | G | -0.248 | 0.031 | 2.60E-15 | 62.58  |
| rs4957026  | A | G | 0.198  | 0.032 | 8.12E-10 | 37.65  |
| rs4961293  | T | C | 0.227  | 0.030 | 7.35E-14 | 56.03  |
| rs4963661  | T | C | -0.252 | 0.035 | 5.17E-13 | 52.01  |
| rs4965529  | A | C | -0.273 | 0.040 | 1.27E-11 | 45.82  |
| rs4980515  | T | C | 0.225  | 0.030 | 9.73E-14 | 55.29  |
| rs509833   | A | G | 0.329  | 0.044 | 7.08E-14 | 55.91  |
| rs519537   | A | G | 0.197  | 0.030 | 5.20E-11 | 42.97  |
| rs525271   | T | C | 0.234  | 0.033 | 1.67E-12 | 49.81  |
| rs55678414 | T | G | -0.689 | 0.063 | 1.56E-27 | 118.07 |
| rs55732192 | T | G | -0.336 | 0.052 | 1.15E-10 | 41.54  |
| rs557526   | A | G | -0.206 | 0.036 | 6.53E-09 | 33.61  |
| rs55752997 | A | C | 0.387  | 0.060 | 1.01E-10 | 41.78  |
| rs55924432 | T | C | 0.265  | 0.032 | 5.70E-17 | 69.94  |
| rs55938136 | A | G | 0.252  | 0.040 | 1.71E-10 | 40.83  |
| rs55944332 | A | G | -0.261 | 0.036 | 1.79E-13 | 54.18  |
| rs56085433 | A | G | -0.251 | 0.044 | 8.21E-09 | 33.29  |
| rs56213443 | A | C | -0.174 | 0.031 | 1.39E-08 | 32.15  |
| rs56288724 | A | G | -0.218 | 0.031 | 2.01E-12 | 49.36  |
| rs56334134 | A | G | 0.173  | 0.032 | 3.69E-08 | 30.27  |
| rs56388530 | T | C | 0.416  | 0.036 | 2.84E-31 | 135.29 |
| rs56407827 | T | C | 0.360  | 0.034 | 2.78E-26 | 112.30 |
| rs56719405 | A | G | 0.358  | 0.065 | 3.88E-08 | 30.17  |
| rs569550   | T | G | -0.577 | 0.032 | 1.33E-73 | 328.66 |
| rs571689   | T | C | 0.228  | 0.030 | 6.77E-14 | 56.25  |
| rs573455   | A | G | 0.199  | 0.030 | 4.77E-11 | 43.31  |
| rs5742643  | T | C | -0.223 | 0.035 | 1.53E-10 | 40.94  |
| rs57946343 | T | C | 0.716  | 0.043 | 2.10E-63 | 282.49 |
| rs59296210 | T | C | 0.592  | 0.089 | 2.63E-11 | 44.43  |
| rs59400568 | A | G | 0.224  | 0.038 | 2.88E-09 | 35.27  |
| rs59980837 | T | G | 1.100  | 0.116 | 3.32E-21 | 89.41  |
| rs60191654 | A | G | -0.238 | 0.039 | 5.88E-10 | 38.28  |
| rs6021247  | A | G | 0.233  | 0.030 | 9.80E-15 | 59.82  |
| rs6031431  | A | G | -0.262 | 0.030 | 7.05E-18 | 74.11  |

|            |   |   |        |       |          |        |
|------------|---|---|--------|-------|----------|--------|
| rs6039211  | A | G | 0.283  | 0.031 | 1.94E-19 | 81.52  |
| rs6040316  | T | C | -0.986 | 0.147 | 1.85E-11 | 45.10  |
| rs604723   | T | C | -0.655 | 0.034 | 2.55E-83 | 373.32 |
| rs6054139  | A | G | 0.209  | 0.031 | 8.23E-12 | 46.83  |
| rs6058088  | T | G | 0.283  | 0.042 | 1.14E-11 | 46.12  |
| rs6062324  | A | G | -0.329 | 0.036 | 1.18E-19 | 82.34  |
| rs60672471 | T | C | 0.278  | 0.049 | 1.49E-08 | 32.07  |
| rs606950   | A | G | 0.270  | 0.031 | 3.23E-18 | 75.59  |
| rs6078093  | A | G | -0.185 | 0.030 | 1.20E-09 | 36.99  |
| rs6090907  | A | G | -0.385 | 0.043 | 1.29E-19 | 82.23  |
| rs60991988 | T | G | 0.379  | 0.050 | 2.82E-14 | 57.89  |
| rs6108787  | T | G | -0.427 | 0.030 | 5.38E-46 | 202.97 |
| rs613872   | T | G | -0.224 | 0.040 | 1.67E-08 | 31.88  |
| rs6141766  | A | G | -0.314 | 0.042 | 9.94E-14 | 55.49  |
| rs61762319 | A | G | 0.571  | 0.100 | 1.28E-08 | 32.38  |
| rs61772592 | A | G | -0.318 | 0.046 | 2.86E-12 | 48.88  |
| rs61798313 | A | G | -0.513 | 0.079 | 6.60E-11 | 42.62  |
| rs61929307 | T | G | -0.190 | 0.032 | 1.79E-09 | 36.19  |
| rs61942628 | T | C | 0.328  | 0.057 | 9.95E-09 | 32.84  |
| rs61948066 | T | G | 0.281  | 0.047 | 2.07E-09 | 35.92  |
| rs62039771 | T | G | 0.332  | 0.051 | 6.62E-11 | 42.54  |
| rs62059712 | T | C | 0.494  | 0.058 | 9.88E-18 | 73.55  |
| rs62169534 | T | C | 0.190  | 0.030 | 3.74E-10 | 39.36  |
| rs62301873 | A | G | -0.300 | 0.050 | 1.60E-09 | 36.34  |
| rs62309747 | A | G | -0.224 | 0.030 | 1.59E-13 | 54.49  |
| rs62421489 | A | G | 0.397  | 0.055 | 8.34E-13 | 51.25  |
| rs62523863 | A | G | 0.269  | 0.037 | 2.87E-13 | 53.39  |
| rs6271     | T | C | -0.555 | 0.061 | 1.18E-19 | 82.42  |
| rs6416749  | T | C | 0.231  | 0.034 | 9.68E-12 | 46.27  |
| rs6438857  | T | C | 0.274  | 0.031 | 3.13E-19 | 80.47  |
| rs6452769  | A | G | -0.314 | 0.038 | 7.82E-17 | 69.50  |
| rs6466878  | T | C | 0.196  | 0.032 | 1.54E-09 | 36.52  |
| rs6490019  | A | G | -0.290 | 0.031 | 6.61E-21 | 87.90  |
| rs6497759  | A | G | -0.327 | 0.038 | 8.79E-18 | 73.75  |
| rs6504213  | T | C | -0.298 | 0.031 | 1.25E-21 | 91.35  |
| rs6538211  | T | C | 0.217  | 0.030 | 4.59E-13 | 52.51  |
| rs6539467  | A | G | 0.265  | 0.040 | 5.57E-11 | 43.03  |
| rs6540125  | T | G | 0.204  | 0.032 | 1.21E-10 | 41.49  |
| rs6557155  | T | G | 0.191  | 0.031 | 1.14E-09 | 37.08  |
| rs6562778  | A | G | 0.178  | 0.030 | 4.96E-09 | 34.28  |
| rs6565174  | A | C | -0.288 | 0.048 | 2.57E-09 | 35.46  |
| rs6567160  | T | C | 0.224  | 0.036 | 3.33E-10 | 39.44  |
| rs6570530  | T | C | 0.221  | 0.031 | 6.04E-13 | 51.97  |
| rs658780   | T | G | -0.203 | 0.035 | 5.29E-09 | 34.16  |

|            |   |   |        |       |          |        |
|------------|---|---|--------|-------|----------|--------|
| rs6723509  | T | C | 0.253  | 0.044 | 7.61E-09 | 33.39  |
| rs6734118  | A | C | -0.323 | 0.037 | 1.42E-18 | 77.32  |
| rs6737318  | A | G | 0.235  | 0.036 | 1.13E-10 | 41.61  |
| rs6737690  | A | C | -0.233 | 0.035 | 1.69E-11 | 45.42  |
| rs6739913  | A | G | -0.182 | 0.033 | 4.63E-08 | 29.82  |
| rs6771917  | T | C | -0.379 | 0.036 | 1.39E-26 | 114.16 |
| rs67720684 | A | C | 0.194  | 0.035 | 3.85E-08 | 30.30  |
| rs6785824  | A | G | 0.167  | 0.030 | 3.30E-08 | 30.54  |
| rs67885470 | T | C | -0.209 | 0.038 | 4.12E-08 | 30.16  |
| rs6788984  | A | G | 0.300  | 0.043 | 3.81E-12 | 48.19  |
| rs6806529  | A | C | 0.177  | 0.031 | 1.03E-08 | 32.74  |
| rs68085857 | T | C | 0.274  | 0.036 | 1.68E-14 | 58.91  |
| rs6823767  | T | C | -0.213 | 0.034 | 4.40E-10 | 38.98  |
| rs687914   | T | G | 0.248  | 0.035 | 1.90E-12 | 49.64  |
| rs6884092  | A | C | 0.278  | 0.051 | 3.76E-08 | 30.23  |
| rs6892983  | A | C | 0.343  | 0.031 | 7.11E-29 | 124.61 |
| rs6894014  | T | G | 0.275  | 0.030 | 1.09E-19 | 82.31  |
| rs6905288  | A | G | 0.190  | 0.031 | 1.09E-09 | 37.16  |
| rs6911827  | T | C | 0.238  | 0.031 | 7.96E-15 | 60.39  |
| rs6921291  | T | C | 0.358  | 0.039 | 1.58E-20 | 86.22  |
| rs6957161  | A | G | 0.206  | 0.035 | 2.20E-09 | 35.79  |
| rs6959688  | A | G | -0.234 | 0.031 | 4.22E-14 | 57.17  |
| rs6963105  | A | G | -0.189 | 0.032 | 3.83E-09 | 34.74  |
| rs698748   | A | G | 0.187  | 0.033 | 8.90E-09 | 33.14  |
| rs699      | A | G | -0.375 | 0.031 | 5.59E-34 | 148.08 |
| rs7009170  | T | C | -0.215 | 0.032 | 3.01E-11 | 44.07  |
| rs7012866  | T | G | -0.233 | 0.030 | 1.21E-14 | 59.66  |
| rs7023828  | T | C | -0.260 | 0.031 | 2.17E-17 | 71.92  |
| rs702395   | T | C | 0.232  | 0.031 | 3.24E-14 | 57.76  |
| rs704      | A | G | -0.169 | 0.030 | 1.94E-08 | 31.67  |
| rs7069881  | T | C | -0.181 | 0.033 | 2.90E-08 | 30.69  |
| rs708117   | A | G | 0.287  | 0.030 | 1.59E-21 | 90.56  |
| rs709668   | A | G | -0.294 | 0.038 | 5.96E-15 | 60.94  |
| rs7100912  | T | G | 0.241  | 0.032 | 3.85E-14 | 57.12  |
| rs7106914  | T | C | -0.217 | 0.030 | 6.95E-13 | 51.73  |
| rs7107356  | A | G | -0.460 | 0.030 | 1.63E-52 | 233.35 |
| rs7125196  | T | C | 0.442  | 0.047 | 7.31E-21 | 87.77  |
| rs7134677  | T | C | -0.385 | 0.033 | 4.46E-31 | 134.55 |
| rs71355297 | T | C | 0.199  | 0.036 | 4.09E-08 | 30.14  |
| rs7154723  | A | G | 0.253  | 0.031 | 2.72E-16 | 67.04  |
| rs7156903  | T | G | -0.195 | 0.031 | 5.36E-10 | 38.61  |
| rs7165200  | A | G | 0.201  | 0.030 | 2.87E-11 | 44.34  |
| rs7186298  | T | C | -0.232 | 0.030 | 1.88E-14 | 58.76  |
| rs7196195  | T | G | -0.221 | 0.030 | 3.35E-13 | 52.94  |

|            |   |   |        |       |          |        |
|------------|---|---|--------|-------|----------|--------|
| rs7198817  | A | C | -0.182 | 0.031 | 5.99E-09 | 33.96  |
| rs7204624  | A | G | 0.202  | 0.035 | 1.18E-08 | 32.59  |
| rs7213273  | A | G | -0.400 | 0.032 | 6.24E-37 | 161.25 |
| rs7218708  | A | G | -0.178 | 0.030 | 4.38E-09 | 34.55  |
| rs7246865  | A | G | 0.276  | 0.034 | 1.05E-15 | 64.51  |
| rs7250497  | A | G | 0.205  | 0.032 | 1.16E-10 | 41.40  |
| rs7255933  | A | G | 0.231  | 0.035 | 2.44E-11 | 44.68  |
| rs7256564  | A | G | 0.196  | 0.032 | 1.53E-09 | 36.41  |
| rs72632819 | T | G | 0.186  | 0.033 | 2.40E-08 | 31.22  |
| rs72654647 | A | G | 0.211  | 0.036 | 2.64E-09 | 35.36  |
| rs72661887 | T | C | 0.246  | 0.031 | 3.88E-15 | 61.97  |
| rs72683923 | T | C | 0.959  | 0.110 | 3.08E-18 | 75.82  |
| rs72688070 | T | C | -0.271 | 0.041 | 2.82E-11 | 44.39  |
| rs72834453 | T | G | -0.325 | 0.047 | 2.95E-12 | 48.73  |
| rs72837033 | A | G | 0.235  | 0.032 | 1.89E-13 | 53.98  |
| rs72847885 | A | G | 0.241  | 0.032 | 3.08E-14 | 57.58  |
| rs72931748 | A | G | 0.397  | 0.053 | 6.40E-14 | 56.24  |
| rs73046792 | A | G | -0.355 | 0.043 | 7.23E-17 | 69.60  |
| rs73049928 | A | G | -0.238 | 0.039 | 1.20E-09 | 36.92  |
| rs7306710  | T | C | -0.243 | 0.030 | 1.03E-15 | 64.26  |
| rs73075659 | A | G | 0.396  | 0.032 | 5.52E-35 | 152.34 |
| rs73088122 | T | C | -0.256 | 0.044 | 4.83E-09 | 34.24  |
| rs7315980  | A | G | 0.480  | 0.056 | 7.35E-18 | 74.12  |
| rs73164066 | T | C | -0.217 | 0.033 | 3.18E-11 | 44.12  |
| rs73187288 | A | C | -0.277 | 0.048 | 1.04E-08 | 32.80  |
| rs7331680  | T | G | 0.410  | 0.042 | 3.35E-22 | 93.99  |
| rs733329   | T | C | 0.302  | 0.045 | 3.09E-11 | 44.19  |
| rs7340705  | T | C | -0.243 | 0.032 | 4.87E-14 | 56.72  |
| rs73727605 | A | G | 0.362  | 0.062 | 6.60E-09 | 33.69  |
| rs7394746  | T | C | 0.228  | 0.031 | 9.08E-14 | 55.69  |
| rs74026308 | T | G | 0.244  | 0.041 | 3.28E-09 | 35.02  |
| rs74048200 | A | G | -0.422 | 0.057 | 1.90E-13 | 54.05  |
| rs7406910  | T | C | -0.435 | 0.053 | 3.39E-16 | 66.52  |
| rs7407     | T | C | -0.330 | 0.032 | 1.33E-25 | 109.32 |
| rs7412     | T | C | -0.434 | 0.057 | 4.04E-14 | 57.14  |
| rs74179970 | A | G | 0.408  | 0.057 | 6.83E-13 | 51.57  |
| rs7439567  | T | C | 0.254  | 0.031 | 2.31E-16 | 67.41  |
| rs7460241  | A | G | -0.425 | 0.075 | 1.34E-08 | 32.30  |
| rs749109   | A | G | -0.222 | 0.037 | 2.83E-09 | 35.36  |
| rs7500448  | A | G | 0.223  | 0.035 | 1.98E-10 | 40.49  |
| rs75016974 | T | C | -0.251 | 0.044 | 1.05E-08 | 32.77  |
| rs75088623 | A | G | 0.199  | 0.034 | 5.10E-09 | 34.09  |
| rs7514579  | A | C | 0.224  | 0.036 | 5.45E-10 | 38.61  |
| rs752229   | A | G | -0.404 | 0.046 | 1.60E-18 | 77.21  |

|            |   |   |        |       |          |        |
|------------|---|---|--------|-------|----------|--------|
| rs75497489 | T | C | 0.242  | 0.040 | 1.00E-09 | 37.41  |
| rs7553381  | A | C | -0.196 | 0.036 | 3.76E-08 | 30.23  |
| rs7562     | T | C | 0.231  | 0.031 | 3.26E-14 | 57.51  |
| rs75672964 | T | C | 0.589  | 0.084 | 2.35E-12 | 49.20  |
| rs7578940  | T | G | 0.184  | 0.030 | 1.10E-09 | 37.08  |
| rs75961402 | A | G | 0.266  | 0.042 | 1.95E-10 | 40.47  |
| rs7600439  | A | G | -0.184 | 0.030 | 1.19E-09 | 36.92  |
| rs7606205  | A | C | -0.184 | 0.033 | 3.06E-08 | 30.63  |
| rs7615099  | A | G | 0.189  | 0.032 | 3.90E-09 | 34.70  |
| rs7630377  | T | C | 0.174  | 0.030 | 7.30E-09 | 33.53  |
| rs76452347 | T | C | -0.297 | 0.040 | 7.13E-14 | 56.12  |
| rs76719272 | T | C | -0.274 | 0.046 | 2.97E-09 | 35.27  |
| rs767717   | T | C | 0.220  | 0.031 | 1.92E-12 | 49.68  |
| rs7683728  | T | C | -0.365 | 0.030 | 2.43E-33 | 144.47 |
| rs7703560  | A | G | -0.225 | 0.033 | 1.51E-11 | 45.49  |
| rs77151571 | T | C | 0.574  | 0.089 | 1.24E-10 | 41.37  |
| rs7725413  | T | C | -0.199 | 0.036 | 3.07E-08 | 30.57  |
| rs7734385  | A | G | -0.181 | 0.031 | 3.83E-09 | 34.68  |
| rs77375686 | A | G | -0.347 | 0.049 | 8.38E-13 | 51.10  |
| rs77413490 | T | G | 0.449  | 0.076 | 4.27E-09 | 34.52  |
| rs7744319  | T | C | -0.175 | 0.031 | 2.23E-08 | 31.28  |
| rs7751856  | A | C | 0.197  | 0.033 | 1.68E-09 | 36.41  |
| rs7763294  | T | G | -0.200 | 0.032 | 6.39E-10 | 38.26  |
| rs7763558  | A | G | 0.336  | 0.032 | 1.17E-25 | 109.76 |
| rs7765526  | A | G | 0.201  | 0.031 | 5.88E-11 | 42.87  |
| rs778124   | A | G | 0.297  | 0.031 | 1.45E-21 | 90.89  |
| rs77924615 | A | G | -0.408 | 0.039 | 1.12E-25 | 109.50 |
| rs7821832  | T | G | 0.422  | 0.035 | 6.67E-34 | 147.19 |
| rs78474310 | A | G | -0.470 | 0.073 | 1.51E-10 | 40.98  |
| rs78550103 | A | G | -0.284 | 0.043 | 4.45E-11 | 43.48  |
| rs78648104 | T | C | -0.429 | 0.054 | 2.37E-15 | 62.79  |
| rs786923   | T | C | -0.308 | 0.031 | 2.83E-23 | 98.84  |
| rs7874646  | T | C | -0.206 | 0.038 | 4.25E-08 | 29.96  |
| rs79119657 | A | G | -0.232 | 0.039 | 2.29E-09 | 35.78  |
| rs7912283  | A | G | -0.214 | 0.032 | 2.94E-11 | 44.33  |
| rs79208229 | T | G | 0.381  | 0.057 | 1.99E-11 | 45.06  |
| rs7927515  | A | C | 0.227  | 0.032 | 1.05E-12 | 50.68  |
| rs7944927  | T | C | 0.224  | 0.039 | 1.23E-08 | 32.51  |
| rs79539362 | T | C | 0.400  | 0.050 | 2.09E-15 | 63.08  |
| rs7963801  | T | C | -0.236 | 0.031 | 2.87E-14 | 57.68  |
| rs79682447 | A | G | 0.501  | 0.081 | 6.02E-10 | 38.32  |
| rs7976260  | T | C | -0.708 | 0.105 | 1.31E-11 | 45.75  |
| rs7977406  | A | G | -0.346 | 0.033 | 4.13E-26 | 111.70 |
| rs79780963 | T | C | -1.097 | 0.057 | 1.21E-83 | 375.37 |

|            |   |   |        |       |          |        |
|------------|---|---|--------|-------|----------|--------|
| rs79802331 | T | G | 0.338  | 0.054 | 3.84E-10 | 39.13  |
| rs79917357 | A | G | 0.298  | 0.040 | 1.40E-13 | 54.68  |
| rs79932633 | A | C | -0.274 | 0.049 | 3.10E-08 | 30.67  |
| rs8003103  | A | G | -0.176 | 0.032 | 3.60E-08 | 30.27  |
| rs80045342 | A | G | -0.334 | 0.060 | 2.12E-08 | 31.42  |
| rs80100774 | T | G | 0.370  | 0.061 | 1.43E-09 | 36.61  |
| rs8014182  | T | C | -0.334 | 0.044 | 5.23E-14 | 56.55  |
| rs8077276  | A | G | -0.295 | 0.031 | 5.15E-21 | 88.20  |
| rs813412   | T | C | -0.210 | 0.035 | 1.87E-09 | 36.14  |
| rs8142376  | T | C | 0.168  | 0.030 | 2.20E-08 | 31.21  |
| rs839755   | A | C | -0.267 | 0.031 | 5.41E-18 | 74.87  |
| rs848309   | T | C | -0.246 | 0.030 | 5.98E-16 | 65.54  |
| rs848445   | T | C | -0.203 | 0.034 | 2.28E-09 | 35.68  |
| rs849138   | A | G | -0.189 | 0.030 | 3.99E-10 | 39.03  |
| rs863930   | T | G | -0.189 | 0.030 | 3.98E-10 | 39.00  |
| rs869396   | A | C | -0.212 | 0.031 | 4.12E-12 | 48.09  |
| rs871004   | A | G | 0.234  | 0.032 | 1.65E-13 | 54.30  |
| rs880315   | T | C | -0.508 | 0.032 | 9.59E-56 | 246.97 |
| rs8904     | A | G | 0.306  | 0.031 | 1.71E-22 | 95.03  |
| rs896312   | T | C | 0.194  | 0.032 | 1.60E-09 | 36.37  |
| rs907612   | T | C | 0.319  | 0.032 | 3.83E-23 | 98.39  |
| rs908591   | A | G | -0.205 | 0.032 | 1.55E-10 | 40.94  |
| rs908951   | T | C | -0.226 | 0.032 | 7.14E-13 | 51.52  |
| rs911547   | A | G | -0.308 | 0.043 | 7.76E-13 | 51.44  |
| rs912434   | T | G | 0.234  | 0.035 | 2.47E-11 | 44.44  |
| rs917275   | A | G | -0.173 | 0.031 | 3.26E-08 | 30.60  |
| rs918948   | T | C | -0.201 | 0.032 | 2.73E-10 | 39.82  |
| rs927315   | T | C | 0.169  | 0.030 | 2.44E-08 | 31.07  |
| rs9302885  | A | G | 0.224  | 0.030 | 1.03E-13 | 55.11  |
| rs9311344  | A | G | 0.227  | 0.039 | 7.52E-09 | 33.33  |
| rs932316   | T | C | -0.223 | 0.038 | 6.45E-09 | 33.66  |
| rs9349379  | A | G | 0.266  | 0.031 | 1.31E-17 | 72.91  |
| rs9368222  | A | C | 0.228  | 0.034 | 1.84E-11 | 45.27  |
| rs9394578  | A | C | 0.193  | 0.035 | 2.56E-08 | 30.97  |
| rs9401913  | A | G | 0.520  | 0.031 | 3.66E-65 | 290.90 |
| rs9449350  | T | C | -0.219 | 0.032 | 1.19E-11 | 45.93  |
| rs9486916  | T | C | 0.266  | 0.039 | 5.42E-12 | 47.63  |
| rs9508495  | T | C | -0.356 | 0.035 | 6.34E-24 | 101.54 |
| rs9512650  | A | G | -0.430 | 0.074 | 6.19E-09 | 33.81  |
| rs9526707  | A | G | -0.204 | 0.032 | 2.77E-10 | 39.85  |
| rs9532243  | A | C | 0.224  | 0.030 | 8.17E-14 | 55.80  |
| rs954767   | A | C | -0.213 | 0.035 | 7.53E-10 | 37.79  |
| rs9549328  | T | C | 0.292  | 0.036 | 7.91E-16 | 64.84  |
| rs962369   | T | C | 0.223  | 0.033 | 1.43E-11 | 45.51  |

|           |   |   |        |       |          |        |
|-----------|---|---|--------|-------|----------|--------|
| rs9634314 | A | G | -0.392 | 0.057 | 4.43E-12 | 47.90  |
| rs9652858 | A | G | 0.255  | 0.040 | 1.53E-10 | 40.91  |
| rs9660067 | A | G | 0.267  | 0.033 | 2.52E-16 | 66.98  |
| rs9661802 | A | C | 0.224  | 0.032 | 2.72E-12 | 48.87  |
| rs9716164 | T | C | 0.180  | 0.031 | 3.40E-09 | 34.98  |
| rs9747001 | A | G | -0.265 | 0.037 | 6.85E-13 | 51.50  |
| rs9869437 | A | C | -0.200 | 0.032 | 3.22E-10 | 39.59  |
| rs9875380 | T | C | -0.175 | 0.030 | 6.53E-09 | 33.66  |
| rs9880098 | A | G | 0.308  | 0.031 | 1.59E-23 | 100.06 |
| rs9885632 | T | C | 0.236  | 0.034 | 4.37E-12 | 47.82  |
| rs9886665 | T | C | 0.205  | 0.034 | 2.47E-09 | 35.65  |
| rs994446  | A | G | -0.347 | 0.037 | 1.87E-20 | 85.88  |

---
