# Supplementary material for: Identifying modifiable risk factors of lung cancer: Indications from Mendelian randomization
Source: PubMed Central journal article supplement (PMC8523078; doi:10.1371/journal.pone.0258498), 2021-10-18
Supplement: pone.0258498.s024.pdf [file pone.0258498.s024.pdf]

**S11 Table: Instrumental variables of HDL cholesterol.** SNP is the rsID of genetic variants; A1 is the effect allele; A2 is the other allele; beta is the effect size of A1 on the exposure; se is the standard error of beta; pval is the p value of beta; F is the F statistics.

| SNP        | A1 | A2 | beta  | se    | pval     | F     |
|------------|----|----|-------|-------|----------|-------|
| rs10019888 | A  | G  | 0.027 | 0.005 | 4.90E-08 | 34.45 |
| rs10282707 | C  | T  | 0.025 | 0.004 | 1.03E-11 | 51.02 |
| rs10444840 | G  | A  | 0.020 | 0.004 | 2.05E-08 | 31.04 |
| rs10750215 | T  | G  | 0.026 | 0.004 | 5.95E-14 | 55.18 |
| rs10790166 | G  | A  | 0.030 | 0.006 | 1.27E-08 | 28.77 |
| rs10892001 | G  | A  | 0.021 | 0.004 | 1.37E-08 | 34.35 |
| rs10900221 | A  | G  | 0.025 | 0.004 | 1.00E-09 | 42.42 |
| rs10951983 | G  | A  | 0.029 | 0.005 | 3.60E-10 | 41.53 |
| rs11045163 | G  | A  | 0.022 | 0.004 | 3.20E-09 | 38.44 |
| rs11057405 | G  | A  | 0.041 | 0.006 | 1.23E-09 | 44.16 |
| rs11204072 | C  | T  | 0.034 | 0.004 | 1.28E-13 | 60.06 |
| rs1129555  | A  | G  | 0.034 | 0.004 | 5.19E-17 | 79.59 |
| rs11662909 | A  | G  | 0.035 | 0.005 | 4.63E-11 | 42.49 |
| rs11665227 | G  | A  | 0.022 | 0.004 | 4.84E-08 | 36.67 |
| rs11758326 | A  | G  | 0.034 | 0.006 | 1.40E-08 | 31.25 |
| rs1180647  | C  | T  | 0.026 | 0.005 | 4.18E-08 | 30.02 |
| rs11874381 | A  | G  | 0.035 | 0.005 | 5.52E-12 | 49.86 |
| rs11875600 | G  | A  | 0.054 | 0.007 | 2.29E-12 | 53.25 |
| rs12038699 | A  | G  | 0.022 | 0.004 | 3.98E-09 | 39.51 |
| rs12145743 | G  | T  | 0.020 | 0.004 | 1.80E-08 | 31.80 |
| rs12412743 | C  | T  | 0.029 | 0.005 | 1.31E-09 | 41.82 |
| rs12521454 | T  | C  | 0.025 | 0.004 | 1.35E-09 | 41.09 |
| rs12710745 | A  | G  | 0.022 | 0.004 | 2.91E-08 | 38.44 |
| rs12720917 | C  | T  | 0.098 | 0.006 | 5.89E-68 | 314.9 |
|            |    |    |       |       |          | 0     |
| rs12801636 | A  | G  | 0.024 | 0.004 | 3.15E-08 | 31.31 |
| rs12908474 | C  | T  | 0.081 | 0.005 | 1.01E-55 | 235.8 |
|            |    |    |       |       |          | 8     |
| rs12928598 | A  | G  | 0.038 | 0.004 | 2.48E-17 | 77.69 |
| rs13076253 | A  | C  | 0.028 | 0.005 | 4.96E-09 | 34.76 |
| rs13099479 | A  | G  | 0.036 | 0.006 | 1.82E-08 | 33.71 |
| rs13107325 | C  | T  | 0.071 | 0.008 | 1.07E-15 | 82.39 |
| rs13225097 | A  | G  | 0.023 | 0.004 | 4.33E-08 | 33.88 |
| rs13312735 | G  | T  | 0.058 | 0.009 | 4.89E-12 | 46.40 |
| rs13334864 | T  | C  | 0.057 | 0.007 | 1.83E-18 | 74.59 |
| rs1531517  | A  | G  | 0.044 | 0.007 | 2.43E-08 | 35.35 |
| rs17152302 | T  | C  | 0.022 | 0.004 | 3.96E-08 | 31.36 |
| rs17162330 | T  | C  | 0.038 | 0.005 | 1.44E-13 | 60.14 |
| rs17173637 | T  | C  | 0.036 | 0.006 | 1.90E-08 | 40.56 |

|            |   |   |       |       |          |       |
|------------|---|---|-------|-------|----------|-------|
| rs17380117 | A | G | 0.025 | 0.004 | 3.85E-09 | 36.29 |
| rs174528   | T | C | 0.036 | 0.004 | 2.09E-24 | 108.1 |
|            |   |   |       |       |          | 6     |
| rs17695224 | G | A | 0.029 | 0.004 | 2.42E-13 | 55.29 |
| rs1801706  | A | G | 0.064 | 0.008 | 1.09E-15 | 73.50 |
| rs1991515  | T | C | 0.023 | 0.004 | 5.62E-10 | 36.98 |
| rs2233455  | T | C | 0.057 | 0.007 | 2.27E-14 | 73.80 |
| rs2240466  | A | G | 0.039 | 0.005 | 1.01E-11 | 55.26 |
| rs2256175  | T | C | 0.024 | 0.004 | 2.65E-09 | 37.87 |
| rs2271051  | A | G | 0.049 | 0.007 | 1.60E-11 | 55.12 |
| rs2278236  | A | G | 0.033 | 0.004 | 3.19E-18 | 89.44 |
| rs2282231  | C | T | 0.034 | 0.006 | 2.10E-08 | 32.11 |
| rs2412710  | G | A | 0.084 | 0.014 | 1.36E-09 | 36.52 |
| rs2602836  | A | G | 0.019 | 0.003 | 4.96E-08 | 31.89 |
| rs2606736  | C | T | 0.025 | 0.004 | 4.80E-08 | 32.73 |
| rs2652840  | C | T | 0.027 | 0.004 | 1.09E-10 | 41.94 |
| rs2777797  | A | C | 0.043 | 0.006 | 1.78E-11 | 50.15 |
| rs289723   | C | A | 0.022 | 0.004 | 4.08E-09 | 33.52 |
| rs2925979  | C | T | 0.035 | 0.004 | 1.32E-19 | 89.99 |
| rs2967776  | G | A | 0.041 | 0.005 | 1.76E-13 | 61.02 |
| rs2980885  | A | G | 0.035 | 0.004 | 1.73E-14 | 71.04 |
| rs3184504  | C | T | 0.026 | 0.004 | 4.10E-12 | 51.36 |
| rs333947   | G | A | 0.030 | 0.005 | 3.17E-09 | 39.66 |
| rs3732361  | A | G | 0.020 | 0.004 | 2.54E-08 | 30.56 |
| rs3775228  | C | T | 0.021 | 0.004 | 4.53E-09 | 36.69 |
| rs3775380  | A | G | 0.024 | 0.003 | 1.11E-11 | 50.66 |
| rs3780543  | G | A | 0.050 | 0.005 | 1.42E-19 | 89.71 |
| rs3923113  | C | A | 0.023 | 0.004 | 2.46E-09 | 37.97 |
| rs40271    | C | T | 0.023 | 0.004 | 2.47E-08 | 33.35 |
| rs4075205  | T | C | 0.022 | 0.004 | 3.54E-09 | 40.96 |
| rs4082919  | T | G | 0.024 | 0.004 | 5.74E-11 | 45.85 |
| rs424346   | T | C | 0.068 | 0.011 | 4.84E-08 | 36.11 |
| rs4362515  | C | T | 0.024 | 0.004 | 3.95E-08 | 29.87 |
| rs4622454  | T | C | 0.032 | 0.004 | 1.93E-19 | 84.12 |
| rs4752797  | G | A | 0.034 | 0.005 | 3.25E-10 | 47.58 |
| rs4760278  | A | C | 0.027 | 0.004 | 4.36E-12 | 44.01 |
| rs4784659  | T | C | 0.027 | 0.005 | 1.02E-08 | 31.27 |
| rs486394   | A | C | 0.027 | 0.004 | 2.10E-10 | 49.00 |
| rs4917014  | G | T | 0.022 | 0.004 | 1.03E-08 | 38.03 |
| rs4970834  | T | C | 0.025 | 0.004 | 1.77E-08 | 33.32 |
| rs499974   | C | A | 0.026 | 0.004 | 1.12E-08 | 35.73 |
| rs5754100  | T | C | 0.034 | 0.006 | 3.86E-08 | 27.89 |
| rs575442   | T | C | 0.032 | 0.004 | 1.03E-14 | 64.00 |
| rs6031587  | C | T | 0.049 | 0.007 | 1.92E-09 | 43.49 |

|            |   |   |       |       |          |       |
|------------|---|---|-------|-------|----------|-------|
| rs605066   | T | C | 0.028 | 0.005 | 2.79E-08 | 32.89 |
| rs6065904  | G | A | 0.052 | 0.006 | 1.95E-18 | 71.28 |
| rs645040   | G | T | 0.031 | 0.004 | 1.53E-12 | 55.18 |
| rs6488910  | T | G | 0.021 | 0.004 | 4.19E-08 | 32.43 |
| rs6589567  | C | A | 0.039 | 0.006 | 2.18E-09 | 45.68 |
| rs6668958  | T | G | 0.023 | 0.004 | 4.21E-08 | 30.25 |
| rs6694102  | G | A | 0.030 | 0.005 | 1.69E-08 | 33.51 |
| rs6857     | C | T | 0.067 | 0.008 | 2.63E-17 | 75.71 |
| rs6971365  | T | C | 0.024 | 0.004 | 1.31E-10 | 38.24 |
| rs7012891  | T | C | 0.023 | 0.004 | 2.13E-08 | 33.64 |
| rs7073746  | G | A | 0.019 | 0.003 | 1.79E-08 | 30.90 |
| rs7165301  | T | C | 0.056 | 0.005 | 3.84E-28 | 144.0 |
|            |   |   |       |       |          | 0     |
| rs719726   | C | T | 0.019 | 0.004 | 4.86E-09 | 30.41 |
| rs7244158  | C | T | 0.090 | 0.014 | 1.46E-11 | 42.82 |
| rs7298751  | G | A | 0.043 | 0.005 | 2.46E-16 | 69.66 |
| rs731839   | A | G | 0.022 | 0.004 | 3.44E-09 | 35.35 |
| rs737337   | T | C | 0.057 | 0.006 | 4.56E-17 | 85.79 |
| rs73959582 | C | T | 0.067 | 0.008 | 5.63E-17 | 80.76 |
| rs7578326  | G | A | 0.028 | 0.004 | 2.50E-13 | 60.93 |
| rs7613875  | C | A | 0.025 | 0.004 | 1.79E-11 | 49.39 |
| rs767145   | A | G | 0.020 | 0.004 | 2.35E-08 | 31.80 |
| rs783149   | C | A | 0.031 | 0.005 | 2.95E-11 | 46.30 |
| rs7844579  | T | C | 0.022 | 0.003 | 1.03E-08 | 41.87 |
| rs7932354  | T | C | 0.022 | 0.004 | 1.76E-08 | 32.11 |
| rs7954519  | T | G | 0.039 | 0.005 | 1.99E-13 | 63.35 |
| rs80164982 | A | C | 0.049 | 0.009 | 4.70E-08 | 32.60 |
| rs8047395  | G | A | 0.019 | 0.004 | 2.88E-08 | 28.55 |
| rs8071366  | G | A | 0.025 | 0.004 | 2.08E-09 | 34.31 |
| rs820299   | A | G | 0.064 | 0.004 | 1.46E-67 | 301.0 |
|            |   |   |       |       |          | 7     |
| rs838878   | A | G | 0.049 | 0.004 | 3.96E-30 | 141.0 |
|            |   |   |       |       |          | 9     |
| rs863750   | C | T | 0.026 | 0.004 | 4.71E-13 | 56.89 |
| rs9332412  | G | A | 0.021 | 0.003 | 1.87E-08 | 36.71 |
| rs9897185  | G | A | 0.036 | 0.006 | 4.13E-08 | 31.64 |
| rs9938618  | G | A | 0.058 | 0.008 | 1.44E-11 | 48.16 |
| rs998584   | C | A | 0.026 | 0.004 | 2.27E-11 | 46.81 |

---
