# Supplementary material for: Identifying modifiable risk factors of lung cancer: Indications from Mendelian randomization
Source: PubMed Central journal article supplement (PMC8523078; doi:10.1371/journal.pone.0258498), 2021-10-18
Supplement: pone.0258498.s025.pdf [file pone.0258498.s025.pdf]

**S12 Table: Instrumental variables of LDL cholesterol.** SNP is the rsID of genetic variants; A1 is the effect allele; A2 is the other allele; beta is the effect size of A1 on the exposure; se is the standard error of beta; pval is the p value of beta; F is the F statistics.

| SNP        | A1 | A2 | beta  | se    | pval     | F      |
|------------|----|----|-------|-------|----------|--------|
| rs10102164 | A  | G  | 0.032 | 0.005 | 3.74E-11 | 49.312 |
| rs10128711 | C  | T  | 0.034 | 0.004 | 9.21E-13 | 59.711 |
| rs10195252 | T  | C  | 0.024 | 0.004 | 3.81E-08 | 37.241 |
| rs1030431  | A  | G  | 0.034 | 0.004 | 5.97E-17 | 81.950 |
| rs1048699  | T  | C  | 0.032 | 0.006 | 1.81E-08 | 31.206 |
| rs10495907 | A  | G  | 0.041 | 0.005 | 1.26E-13 | 60.960 |
| rs11125936 | T  | C  | 0.037 | 0.006 | 4.07E-08 | 37.210 |
| rs11216103 | A  | G  | 0.047 | 0.008 | 5.91E-10 | 37.758 |
| rs11220437 | C  | T  | 0.034 | 0.006 | 5.76E-09 | 35.163 |
| rs11244084 | T  | C  | 0.070 | 0.010 | 7.86E-11 | 44.787 |
| rs11294867 | T  | G  | 0.062 | 0.011 | 2.70E-08 | 34.654 |
| 5          |    |    |       |       |          |        |
| rs1129555  | A  | G  | 0.030 | 0.004 | 1.54E-13 | 57.381 |
| rs11563251 | T  | C  | 0.035 | 0.006 | 4.50E-08 | 30.964 |
| rs11650232 | G  | A  | 0.022 | 0.004 | 3.19E-08 | 32.111 |
| rs11668536 | C  | T  | 0.051 | 0.005 | 4.30E-26 | 129.96 |
|            |    |    |       |       |          | 0      |
| rs11679386 | C  | T  | 0.045 | 0.006 | 4.75E-14 | 54.906 |
| rs11878377 | C  | T  | 0.055 | 0.006 | 4.13E-19 | 88.620 |
| rs12067569 | A  | G  | 0.089 | 0.010 | 1.97E-17 | 78.323 |
| rs1250229  | C  | T  | 0.024 | 0.004 | 3.13E-08 | 33.474 |
| rs12625035 | C  | T  | 0.033 | 0.005 | 2.90E-11 | 43.296 |
| rs12686004 | G  | A  | 0.036 | 0.006 | 2.25E-09 | 38.099 |
| rs12720842 | C  | T  | 0.099 | 0.012 | 1.88E-15 | 73.280 |
| rs12721109 | G  | A  | 0.446 | 0.018 | 2.99E-   | 594.50 |
|            |    |    |       |       | 122      | 7      |
| rs12753981 | A  | G  | 0.054 | 0.008 | 2.21E-09 | 45.394 |
| rs12983082 | C  | A  | 0.051 | 0.006 | 1.52E-18 | 85.983 |
| rs12983889 | A  | G  | 0.056 | 0.007 | 5.06E-15 | 67.820 |
| rs13027716 | T  | G  | 0.059 | 0.011 | 4.84E-08 | 26.893 |
| rs1337247  | C  | A  | 0.051 | 0.006 | 7.74E-17 | 70.840 |
| rs1386585  | T  | C  | 0.034 | 0.005 | 2.21E-12 | 53.672 |
| rs1408272  | T  | G  | 0.052 | 0.008 | 3.68E-09 | 39.251 |
| rs1501910  | G  | A  | 0.035 | 0.005 | 1.44E-10 | 45.045 |
| rs16872770 | A  | G  | 0.041 | 0.007 | 8.57E-09 | 32.538 |
| rs16891156 | C  | A  | 0.097 | 0.017 | 8.23E-09 | 31.847 |
| rs16988072 | C  | T  | 0.063 | 0.010 | 1.53E-09 | 38.149 |
| rs17035630 | A  | G  | 0.051 | 0.006 | 1.44E-16 | 68.537 |
| rs17120035 | C  | T  | 0.048 | 0.007 | 4.37E-11 | 44.075 |

|            |   |   |       |       |          |        |
|------------|---|---|-------|-------|----------|--------|
| rs17404153 | G | T | 0.034 | 0.005 | 1.83E-09 | 38.716 |
| rs17508045 | T | C | 0.049 | 0.007 | 4.91E-12 | 54.670 |
| rs17657025 | T | C | 0.035 | 0.007 | 4.40E-08 | 28.122 |
| rs17677316 | A | G | 0.025 | 0.004 | 2.08E-09 | 34.306 |
| rs1800961  | C | T | 0.069 | 0.011 | 6.03E-10 | 41.761 |
| rs1801689  | C | A | 0.103 | 0.014 | 9.81E-12 | 54.696 |
| rs2030746  | T | C | 0.021 | 0.004 | 8.61E-09 | 31.715 |
| rs206070   | A | G | 0.026 | 0.005 | 4.63E-08 | 30.021 |
| rs2088487  | T | C | 0.095 | 0.010 | 9.13E-18 | 89.218 |
| rs2247056  | C | T | 0.025 | 0.004 | 1.42E-08 | 33.263 |
| rs2294266  | A | C | 0.030 | 0.005 | 2.67E-08 | 34.142 |
| rs2328223  | C | A | 0.030 | 0.005 | 5.63E-09 | 35.760 |
| rs2385114  | T | C | 0.036 | 0.004 | 1.05E-19 | 84.734 |
| rs2390536  | A | G | 0.022 | 0.004 | 2.04E-08 | 34.438 |
| rs2495504  | C | T | 0.038 | 0.006 | 3.22E-10 | 41.920 |
| rs2642438  | G | A | 0.035 | 0.004 | 7.32E-16 | 70.240 |
| rs2647281  | G | A | 0.059 | 0.010 | 2.27E-09 | 38.440 |
| rs2649999  | T | C | 0.041 | 0.006 | 1.12E-12 | 50.985 |
| rs267733   | A | G | 0.033 | 0.005 | 5.29E-09 | 39.004 |
| rs2737229  | A | C | 0.029 | 0.004 | 3.74E-12 | 55.675 |
| rs2886232  | T | C | 0.045 | 0.006 | 3.88E-11 | 49.658 |
| rs2902940  | A | G | 0.027 | 0.004 | 1.74E-11 | 44.662 |
| rs2965174  | G | A | 0.025 | 0.004 | 5.21E-11 | 40.006 |
| rs3093584  | T | C | 0.032 | 0.005 | 4.90E-09 | 37.634 |
| rs3103353  | T | C | 0.034 | 0.006 | 3.13E-08 | 32.625 |
| rs3184504  | C | T | 0.027 | 0.004 | 4.20E-12 | 49.740 |
| rs364585   | G | A | 0.025 | 0.004 | 4.28E-10 | 42.937 |
| rs3780181  | A | G | 0.045 | 0.007 | 1.76E-09 | 36.162 |
| rs379309   | C | T | 0.031 | 0.004 | 1.39E-13 | 64.411 |
| rs3798236  | T | C | 0.023 | 0.004 | 3.30E-08 | 35.693 |
| rs3895886  | T | C | 0.042 | 0.006 | 1.02E-10 | 47.407 |
| rs4253772  | T | C | 0.031 | 0.006 | 4.33E-08 | 27.214 |
| rs4530754  | A | G | 0.028 | 0.004 | 3.58E-12 | 58.353 |
| rs456598   | A | G | 0.047 | 0.006 | 2.00E-16 | 69.544 |
| rs4704810  | A | G | 0.022 | 0.004 | 8.28E-09 | 32.610 |
| rs4722551  | C | T | 0.039 | 0.005 | 3.95E-14 | 63.674 |
| rs4783961  | G | A | 0.028 | 0.004 | 6.22E-12 | 53.521 |
| rs4788597  | C | T | 0.033 | 0.004 | 2.11E-15 | 75.873 |
| rs4823057  | G | A | 0.078 | 0.012 | 2.03E-08 | 39.264 |
| rs487738   | G | A | 0.030 | 0.006 | 1.82E-08 | 26.576 |
| rs499790   | T | C | 0.036 | 0.006 | 6.46E-09 | 37.854 |
| rs516246   | T | C | 0.029 | 0.004 | 1.33E-13 | 55.675 |
| rs603643   | G | A | 0.025 | 0.004 | 3.79E-09 | 37.823 |
| rs631106   | C | A | 0.049 | 0.004 | 1.58E-31 | 148.84 |

|           |   |   |       |       |          |        |
|-----------|---|---|-------|-------|----------|--------|
|           |   |   |       |       |          | 0      |
| rs6415084 | T | C | 0.025 | 0.004 | 1.35E-10 | 45.654 |
| rs6573778 | T | C | 0.030 | 0.004 | 3.33E-14 | 56.626 |
| rs6756743 | T | C | 0.055 | 0.009 | 4.97E-09 | 36.131 |
| rs676385  | G | A | 0.035 | 0.004 | 1.17E-15 | 67.775 |
| rs6818397 | T | G | 0.022 | 0.004 | 1.68E-08 | 31.360 |
| rs6857    | T | C | 0.192 | 0.008 | 5.12E-   | 520.81 |
|           |   |   |       |       | 110      | 8      |
| rs6917747 | A | G | 0.036 | 0.005 | 8.07E-10 | 44.940 |
| rs7014582 | G | A | 0.034 | 0.006 | 2.43E-08 | 36.215 |
| rs713286  | T | C | 0.047 | 0.007 | 4.50E-10 | 43.158 |
| rs7225700 | C | T | 0.030 | 0.004 | 3.56E-13 | 61.087 |
| rs7264396 | C | T | 0.025 | 0.005 | 4.41E-08 | 29.884 |
| rs7469576 | G | A | 0.029 | 0.005 | 1.22E-08 | 37.261 |
| rs7515901 | C | T | 0.049 | 0.005 | 4.28E-18 | 88.432 |
| rs7604788 | C | T | 0.134 | 0.013 | 4.12E-22 | 103.85 |
|           |   |   |       |       |          | 3      |
| rs7616006 | A | G | 0.025 | 0.004 | 2.54E-10 | 45.654 |
| rs7640978 | C | T | 0.039 | 0.007 | 9.84E-09 | 32.276 |
| rs7774197 | C | A | 0.051 | 0.007 | 2.97E-10 | 48.426 |
| rs7798185 | A | C | 0.041 | 0.007 | 1.88E-09 | 38.402 |
| rs780093  | T | C | 0.022 | 0.004 | 2.36E-08 | 36.325 |
| rs7849542 | A | G | 0.024 | 0.004 | 1.12E-08 | 35.127 |
| rs865774  | C | T | 0.035 | 0.006 | 2.76E-10 | 41.427 |
| rs9932707 | C | A | 0.030 | 0.004 | 5.25E-14 | 63.568 |
| rs9973305 | C | T | 0.053 | 0.009 | 1.01E-09 | 38.294 |
| rs9989419 | A | G | 0.028 | 0.004 | 2.49E-12 | 50.446 |
