# Supplementary material for: Identifying modifiable risk factors of lung cancer: Indications from Mendelian randomization
Source: PubMed Central journal article supplement (PMC8523078; doi:10.1371/journal.pone.0258498), 2021-10-18
Supplement: pone.0258498.s026.pdf [file pone.0258498.s026.pdf]

**S13 Table: Instrumental variables of total cholesterol.** SNP is the rsID of genetic variants; A1 is the effect allele; A2 is the other allele; beta is the effect size of A1 on the exposure; se is the standard error of beta; pval is the p value of beta; F is the F statistics.

| SNP         | A1 | A2 | beta  | se    | pval     | F      |
|-------------|----|----|-------|-------|----------|--------|
| rs10088180  | A  | G  | 0.023 | 0.004 | 6.02E-10 | 32.49  |
| rs10102164  | A  | G  | 0.030 | 0.004 | 4.60E-11 | 49.00  |
| rs10128711  | C  | T  | 0.031 | 0.004 | 1.06E-11 | 50.97  |
| rs10258022  | G  | A  | 0.024 | 0.004 | 9.89E-11 | 45.56  |
| rs1030431   | A  | G  | 0.038 | 0.004 | 5.41E-22 | 104.37 |
| rs10403668  | G  | A  | 0.039 | 0.005 | 2.41E-13 | 61.47  |
| rs10495907  | A  | G  | 0.035 | 0.005 | 3.09E-11 | 47.89  |
| rs10773003  | A  | G  | 0.037 | 0.006 | 4.08E-09 | 40.48  |
| rs10774708  | G  | A  | 0.021 | 0.004 | 4.71E-08 | 36.34  |
| rs1077514   | T  | C  | 0.030 | 0.005 | 6.40E-09 | 33.51  |
| rs10900221  | A  | G  | 0.026 | 0.004 | 7.96E-09 | 38.68  |
| rs11085752  | A  | C  | 0.034 | 0.005 | 2.53E-09 | 42.25  |
| rs11650232  | G  | A  | 0.023 | 0.004 | 1.77E-09 | 38.98  |
| rs11679386  | C  | T  | 0.039 | 0.006 | 2.23E-11 | 44.37  |
| rs117733303 | G  | A  | 0.130 | 0.021 | 1.15E-08 | 37.42  |
| rs11784762  | G  | A  | 0.033 | 0.005 | 4.02E-08 | 36.22  |
| rs12412743  | C  | T  | 0.030 | 0.005 | 6.98E-10 | 40.20  |
| rs12625035  | C  | T  | 0.028 | 0.005 | 3.62E-09 | 35.01  |
| rs12660382  | T  | C  | 0.027 | 0.005 | 4.96E-09 | 33.44  |
| rs12908474  | C  | T  | 0.040 | 0.006 | 6.09E-12 | 48.28  |
| rs12921986  | G  | A  | 0.047 | 0.007 | 2.42E-10 | 44.70  |
| rs13027175  | G  | T  | 0.065 | 0.011 | 2.23E-09 | 35.67  |
| rs13075746  | G  | A  | 0.036 | 0.006 | 3.84E-08 | 32.97  |
| rs1337247   | C  | A  | 0.038 | 0.006 | 4.76E-11 | 42.93  |
| rs1384614   | A  | G  | 0.037 | 0.006 | 1.36E-08 | 32.88  |
| rs138777    | A  | G  | 0.021 | 0.004 | 4.74E-08 | 33.45  |
| rs1473886   | G  | T  | 0.024 | 0.004 | 5.06E-10 | 45.47  |
| rs1501910   | G  | A  | 0.037 | 0.005 | 1.30E-12 | 54.46  |
| rs1594895   | T  | C  | 0.026 | 0.005 | 3.18E-08 | 33.13  |
| rs16979595  | A  | G  | 0.030 | 0.005 | 5.42E-09 | 35.05  |
| rs17035630  | A  | G  | 0.040 | 0.006 | 2.16E-12 | 48.04  |
| rs17120035  | C  | T  | 0.066 | 0.007 | 7.33E-22 | 88.90  |
| rs17135399  | G  | A  | 0.051 | 0.008 | 7.39E-11 | 40.16  |
| rs17398765  | G  | A  | 0.073 | 0.007 | 9.90E-24 | 101.10 |
| rs17508045  | T  | C  | 0.039 | 0.006 | 1.13E-08 | 38.91  |
| rs17651629  | C  | T  | 0.032 | 0.006 | 3.85E-08 | 30.16  |
| rs1800562   | G  | A  | 0.057 | 0.008 | 1.91E-12 | 53.84  |
| rs1800961   | C  | T  | 0.106 | 0.010 | 1.34E-24 | 110.56 |
| rs1801701   | T  | C  | 0.050 | 0.006 | 8.30E-15 | 64.26  |

|           |   |   |       |       |          |        |
|-----------|---|---|-------|-------|----------|--------|
| rs181360  | T | G | 0.028 | 0.004 | 7.32E-10 | 41.80  |
| rs195517  | G | A | 0.031 | 0.005 | 3.23E-08 | 35.54  |
| rs1997243 | G | A | 0.033 | 0.005 | 2.72E-10 | 44.09  |
| rs2023472 | G | A | 0.021 | 0.004 | 4.21E-08 | 30.11  |
| rs2030746 | T | C | 0.020 | 0.004 | 3.60E-08 | 28.93  |
| rs2070959 | A | G | 0.021 | 0.004 | 3.52E-08 | 31.91  |
| rs207150  | C | T | 0.035 | 0.006 | 2.96E-08 | 31.40  |
| rs2141371 | A | G | 0.025 | 0.004 | 1.58E-08 | 34.59  |
| rs2155216 | T | C | 0.090 | 0.015 | 5.51E-09 | 37.58  |
| rs2156499 | G | A | 0.026 | 0.004 | 1.02E-10 | 45.13  |
| rs2165537 | T | G | 0.090 | 0.013 | 1.61E-12 | 45.79  |
| rs2249742 | T | C | 0.024 | 0.004 | 4.86E-10 | 39.23  |
| rs2287019 | C | T | 0.029 | 0.005 | 4.02E-10 | 40.29  |
| rs2287623 | G | A | 0.027 | 0.004 | 4.09E-12 | 57.51  |
| rs2294261 | A | C | 0.025 | 0.004 | 2.37E-10 | 46.32  |
| rs2385114 | T | C | 0.039 | 0.004 | 7.14E-24 | 103.18 |
| rs2390536 | A | G | 0.022 | 0.004 | 7.74E-09 | 35.68  |
| rs2495504 | C | T | 0.042 | 0.006 | 1.88E-12 | 54.81  |
| rs2508015 | G | A | 0.024 | 0.004 | 9.55E-09 | 34.52  |
| rs2642438 | G | A | 0.037 | 0.004 | 1.28E-18 | 85.56  |
| rs2649999 | T | C | 0.040 | 0.006 | 6.11E-13 | 51.53  |
| rs2737229 | A | C | 0.029 | 0.004 | 1.86E-13 | 58.24  |
| rs2777797 | A | C | 0.039 | 0.006 | 1.13E-08 | 37.32  |
| rs2792744 | C | A | 0.034 | 0.006 | 2.73E-09 | 31.92  |
| rs2814982 | C | T | 0.044 | 0.006 | 3.68E-15 | 59.86  |
| rs287227  | G | T | 0.065 | 0.007 | 2.72E-18 | 77.63  |
| rs2886232 | T | C | 0.036 | 0.006 | 3.87E-08 | 33.34  |
| rs2902940 | A | G | 0.024 | 0.004 | 8.84E-10 | 38.19  |
| rs3091242 | T | C | 0.028 | 0.004 | 1.70E-13 | 62.23  |
| rs3103353 | T | C | 0.036 | 0.006 | 3.28E-10 | 40.33  |
| rs3184504 | C | T | 0.032 | 0.004 | 1.62E-17 | 73.87  |
| rs3208856 | C | T | 0.203 | 0.019 | 1.09E-28 | 117.05 |
| rs3739095 | G | A | 0.022 | 0.004 | 2.40E-09 | 36.33  |
| rs3745157 | T | C | 0.025 | 0.004 | 2.15E-10 | 43.98  |
| rs3780181 | A | G | 0.044 | 0.007 | 6.67E-10 | 38.76  |
| rs3780542 | A | G | 0.049 | 0.008 | 2.35E-08 | 35.85  |
| rs3809630 | A | G | 0.031 | 0.005 | 1.54E-08 | 35.10  |
| rs3818441 | G | A | 0.028 | 0.004 | 2.94E-11 | 44.76  |
| rs3895886 | T | C | 0.036 | 0.006 | 1.74E-08 | 37.44  |
| rs4253772 | T | C | 0.032 | 0.006 | 9.85E-09 | 30.82  |
| rs4530754 | A | G | 0.023 | 0.004 | 1.68E-09 | 42.44  |
| rs456598  | A | G | 0.048 | 0.005 | 2.10E-18 | 80.00  |
| rs4704810 | A | G | 0.022 | 0.004 | 2.89E-09 | 37.01  |
| rs4722551 | C | T | 0.029 | 0.005 | 7.02E-09 | 38.07  |

|            |   |   |       |       |          |        |
|------------|---|---|-------|-------|----------|--------|
| rs4752805  | G | A | 0.025 | 0.004 | 1.62E-09 | 37.48  |
| rs4803759  | C | T | 0.054 | 0.006 | 3.70E-21 | 85.72  |
| rs487738   | G | A | 0.035 | 0.006 | 1.50E-11 | 38.35  |
| rs4939593  | T | C | 0.025 | 0.004 | 5.39E-10 | 37.48  |
| rs4968255  | T | C | 0.028 | 0.005 | 2.06E-08 | 32.82  |
| rs499790   | T | C | 0.041 | 0.006 | 1.32E-13 | 52.24  |
| rs5110     | A | C | 0.086 | 0.014 | 1.09E-09 | 38.57  |
| rs516246   | T | C | 0.032 | 0.004 | 9.13E-17 | 72.48  |
| rs56395424 | G | A | 0.032 | 0.005 | 1.03E-08 | 36.91  |
| rs568052   | A | G | 0.033 | 0.006 | 8.92E-09 | 31.28  |
| rs5930     | G | A | 0.041 | 0.004 | 1.24E-24 | 108.37 |
| rs603643   | G | A | 0.023 | 0.004 | 1.45E-08 | 33.88  |
| rs6413458  | G | A | 0.080 | 0.013 | 2.25E-09 | 35.82  |
| rs6430552  | T | C | 0.024 | 0.004 | 1.44E-09 | 41.03  |
| rs6435161  | T | G | 0.024 | 0.004 | 6.09E-09 | 38.82  |
| rs646179   | A | G | 0.041 | 0.005 | 9.50E-16 | 71.39  |
| rs6511727  | T | G | 0.025 | 0.004 | 1.17E-10 | 46.32  |
| rs6573778  | T | C | 0.026 | 0.004 | 2.96E-11 | 45.48  |
| rs6587970  | G | A | 0.029 | 0.005 | 1.24E-09 | 38.66  |
| rs6589936  | A | C | 0.032 | 0.005 | 1.14E-09 | 37.14  |
| rs6756743  | T | C | 0.055 | 0.009 | 1.82E-09 | 38.33  |
| rs676385   | G | A | 0.025 | 0.004 | 1.44E-09 | 36.57  |
| rs6818397  | T | G | 0.025 | 0.004 | 9.51E-11 | 42.42  |
| rs6894099  | C | T | 0.056 | 0.010 | 8.51E-09 | 30.80  |
| rs6917747  | A | G | 0.032 | 0.005 | 5.99E-09 | 38.82  |
| rs7035671  | C | T | 0.036 | 0.005 | 7.66E-10 | 47.13  |
| rs7080366  | T | C | 0.022 | 0.004 | 1.68E-08 | 34.40  |
| rs714948   | A | C | 0.036 | 0.006 | 2.50E-10 | 36.80  |
| rs7178779  | G | T | 0.023 | 0.004 | 3.76E-08 | 29.61  |
| rs7197967  | G | A | 0.035 | 0.005 | 8.20E-10 | 44.61  |
| rs7241687  | G | A | 0.024 | 0.004 | 9.80E-10 | 37.87  |
| rs74444640 | T | C | 0.061 | 0.011 | 4.09E-09 | 33.75  |
| rs7515901  | C | T | 0.041 | 0.005 | 5.84E-14 | 66.26  |
| rs7604788  | C | T | 0.097 | 0.013 | 6.67E-15 | 59.97  |
| rs7640978  | C | T | 0.038 | 0.007 | 1.66E-08 | 32.46  |
| rs77301115 | A | G | 0.157 | 0.016 | 2.85E-20 | 99.49  |
| rs7798185  | A | C | 0.040 | 0.006 | 3.54E-10 | 42.46  |
| rs8176731  | T | C | 0.027 | 0.004 | 5.39E-11 | 44.01  |
| rs865774   | C | T | 0.033 | 0.005 | 1.89E-09 | 38.30  |
| rs892115   | G | T | 0.024 | 0.004 | 8.64E-09 | 35.70  |
| rs9268882  | C | T | 0.035 | 0.006 | 1.91E-09 | 41.19  |
| rs9282575  | G | A | 0.108 | 0.013 | 1.67E-15 | 70.67  |
| rs9376090  | T | C | 0.025 | 0.004 | 2.60E-09 | 40.32  |
| rs9972882  | C | A | 0.024 | 0.004 | 4.16E-08 | 36.91  |

|           |   |   |       |       |          |       |
|-----------|---|---|-------|-------|----------|-------|
| rs9989419 | G | A | 0.032 | 0.004 | 1.03E-15 | 74.33 |
|-----------|---|---|-------|-------|----------|-------|

---
