# Supplementary material for: Identifying modifiable risk factors of lung cancer: Indications from Mendelian randomization
Source: PubMed Central journal article supplement (PMC8523078; doi:10.1371/journal.pone.0258498), 2021-10-18
Supplement: pone.0258498.s027.pdf [file pone.0258498.s027.pdf]

**S14 Table: Instrumental variables of triglycerides.** SNP is the rsID of genetic variants; A1 is the effect allele; A2 is the other allele; beta is the effect size of A1 on the exposure; se is the standard error of beta; pval is the p value of beta; F is the F statistics.

| SNP         | A1 | A2 | beta  | se    | pval     | F      |
|-------------|----|----|-------|-------|----------|--------|
| rs10088180  | A  | G  | 0.021 | 0.004 | 3.87E-08 | 32.52  |
| rs10426094  | C  | T  | 0.024 | 0.004 | 8.47E-09 | 36.30  |
| rs10440120  | C  | A  | 0.031 | 0.004 | 5.34E-11 | 48.37  |
| rs10501321  | T  | C  | 0.022 | 0.004 | 1.41E-08 | 38.09  |
| rs11172147  | G  | A  | 0.033 | 0.006 | 1.97E-09 | 34.92  |
| rs1129555   | G  | A  | 0.021 | 0.004 | 6.72E-09 | 31.30  |
| rs117604010 | G  | A  | 0.137 | 0.017 | 3.11E-15 | 65.04  |
| rs117877390 | C  | T  | 0.110 | 0.014 | 1.53E-09 | 60.75  |
| rs11879589  | G  | A  | 0.037 | 0.006 | 3.84E-11 | 40.92  |
| rs12317176  | T  | C  | 0.024 | 0.004 | 1.23E-10 | 45.47  |
| rs1240658   | C  | T  | 0.035 | 0.005 | 3.01E-12 | 56.58  |
| rs12746810  | A  | G  | 0.037 | 0.006 | 2.33E-09 | 38.27  |
| rs12994068  | C  | A  | 0.025 | 0.004 | 6.71E-10 | 41.57  |
| rs16837533  | A  | G  | 0.024 | 0.005 | 3.87E-08 | 28.92  |
| rs16842     | C  | T  | 0.027 | 0.004 | 6.33E-13 | 54.84  |
| rs16885714  | G  | A  | 0.035 | 0.006 | 2.93E-08 | 34.59  |
| rs17152302  | C  | T  | 0.023 | 0.004 | 2.99E-09 | 33.88  |
| rs17410086  | T  | C  | 0.033 | 0.005 | 2.01E-09 | 36.45  |
| rs174528    | C  | T  | 0.044 | 0.003 | 5.65E-36 | 164.44 |
| rs1781930   | G  | A  | 0.031 | 0.004 | 2.51E-11 | 53.32  |
| rs2068888   | G  | A  | 0.024 | 0.003 | 1.68E-11 | 50.24  |
| rs2122823   | T  | C  | 0.024 | 0.004 | 8.61E-09 | 36.30  |
| rs2284063   | A  | G  | 0.022 | 0.003 | 1.10E-09 | 39.99  |
| rs2303223   | G  | A  | 0.020 | 0.003 | 3.50E-09 | 35.30  |
| rs2304684   | T  | C  | 0.086 | 0.013 | 5.00E-11 | 45.86  |
| rs2384629   | A  | G  | 0.128 | 0.013 | 1.03E-21 | 95.03  |
| rs2412710   | A  | G  | 0.099 | 0.013 | 1.66E-11 | 56.02  |
| rs2523729   | G  | A  | 0.033 | 0.006 | 3.00E-08 | 29.80  |
| rs2869433   | T  | C  | 0.019 | 0.003 | 4.59E-08 | 31.89  |
| rs2967776   | A  | G  | 0.032 | 0.005 | 1.80E-08 | 36.93  |
| rs2976940   | T  | G  | 0.021 | 0.003 | 1.14E-08 | 36.35  |
| rs2980885   | G  | A  | 0.058 | 0.004 | 3.00E-40 | 198.74 |
| rs319       | C  | A  | 0.022 | 0.004 | 6.23E-09 | 32.61  |
| rs3198697   | C  | T  | 0.020 | 0.003 | 2.21E-08 | 33.91  |
| rs35133828  | G  | A  | 0.110 | 0.015 | 4.45E-09 | 52.09  |
| rs3749946   | A  | C  | 0.045 | 0.007 | 4.19E-09 | 40.89  |
| rs3760627   | C  | T  | 0.019 | 0.003 | 5.29E-09 | 30.90  |
| rs3861397   | G  | A  | 0.024 | 0.004 | 1.08E-10 | 45.85  |
| rs38855     | A  | G  | 0.019 | 0.003 | 2.11E-08 | 32.11  |

|            |   |   |       |       |          |        |
|------------|---|---|-------|-------|----------|--------|
| rs3923113  | A | C | 0.024 | 0.004 | 5.69E-11 | 45.08  |
| rs4296389  | C | T | 0.056 | 0.005 | 2.21E-23 | 116.39 |
| rs4711253  | A | C | 0.032 | 0.004 | 1.10E-11 | 56.42  |
| rs4731702  | C | T | 0.018 | 0.003 | 2.19E-08 | 30.75  |
| rs4738684  | A | G | 0.021 | 0.004 | 8.82E-09 | 34.31  |
| rs4783961  | G | A | 0.021 | 0.004 | 1.29E-08 | 34.31  |
| rs4803750  | G | A | 0.042 | 0.007 | 9.52E-09 | 36.52  |
| rs4871598  | A | G | 0.044 | 0.004 | 5.12E-28 | 132.86 |
| rs4871624  | G | T | 0.025 | 0.004 | 1.07E-11 | 47.13  |
| rs4921667  | A | G | 0.031 | 0.005 | 6.00E-09 | 44.07  |
| rs516226   | T | C | 0.067 | 0.007 | 6.22E-22 | 106.25 |
| rs539298   | A | G | 0.019 | 0.003 | 3.60E-08 | 32.46  |
| rs6029143  | C | T | 0.039 | 0.007 | 4.93E-08 | 29.86  |
| rs6065904  | A | G | 0.040 | 0.006 | 4.70E-12 | 46.19  |
| rs6066141  | T | C | 0.030 | 0.005 | 2.34E-08 | 31.40  |
| rs62001736 | A | G | 0.034 | 0.005 | 5.55E-09 | 38.72  |
| rs645040   | T | G | 0.029 | 0.004 | 1.83E-12 | 53.66  |
| rs646179   | A | G | 0.036 | 0.005 | 3.80E-12 | 55.63  |
| rs6587971  | C | T | 0.019 | 0.004 | 6.58E-09 | 25.26  |
| rs6721762  | C | T | 0.074 | 0.009 | 1.35E-14 | 73.04  |
| rs6831256  | G | A | 0.026 | 0.004 | 1.60E-12 | 54.34  |
| rs6857     | T | C | 0.054 | 0.007 | 4.55E-19 | 60.57  |
| rs7073746  | A | G | 0.025 | 0.003 | 1.23E-15 | 59.24  |
| rs719726   | T | C | 0.020 | 0.004 | 2.49E-08 | 32.33  |
| rs7254892  | A | G | 0.124 | 0.011 | 1.40E-24 | 135.74 |
| rs72817536 | A | G | 0.039 | 0.006 | 1.66E-11 | 45.45  |
| rs73012993 | G | A | 0.045 | 0.008 | 2.64E-08 | 29.98  |
| rs731839   | G | A | 0.022 | 0.004 | 2.65E-09 | 38.72  |
| rs7557068  | G | A | 0.036 | 0.006 | 8.04E-10 | 40.19  |
| rs7578326  | A | G | 0.023 | 0.004 | 4.41E-10 | 43.94  |
| rs7588926  | C | T | 0.038 | 0.005 | 1.39E-15 | 63.00  |
| rs76881617 | T | C | 0.077 | 0.011 | 1.18E-10 | 51.12  |
| rs7717984  | T | C | 0.025 | 0.004 | 1.52E-11 | 51.02  |
| rs7943309  | G | A | 0.061 | 0.009 | 1.16E-11 | 48.36  |
| rs8077889  | C | A | 0.025 | 0.004 | 9.88E-09 | 36.00  |
| rs888246   | T | C | 0.071 | 0.006 | 8.99E-31 | 148.59 |
| rs8891     | T | C | 0.025 | 0.004 | 1.16E-08 | 35.71  |
| rs9989419  | A | G | 0.024 | 0.004 | 1.05E-11 | 48.20  |

---
