# Supplementary material for: Identifying modifiable risk factors of lung cancer: Indications from Mendelian randomization
Source: PubMed Central journal article supplement (PMC8523078; doi:10.1371/journal.pone.0258498), 2021-10-18
Supplement: pone.0258498.s028.pdf [file pone.0258498.s028.pdf]

**S15 Table: Instrumental variables of HbA1c.** SNP is the rsID of genetic variants; A1 is the effect allele; A2 is the other allele; beta is the effect size of A1 on the exposure; se is the standard error of beta; pval is the p value of beta; F is the F statistics.

| SNP        | A1 | A2 | Beta   | se    | pval     | F      |
|------------|----|----|--------|-------|----------|--------|
| rs1046896  | C  | T  | -0.028 | 0.002 | 4.46E-64 | 271.28 |
| rs10774625 | A  | G  | -0.009 | 0.002 | 1.46E-08 | 30.25  |
| rs11248914 | C  | T  | -0.014 | 0.002 | 2.56E-14 | 54.29  |
| rs11603334 | A  | G  | -0.012 | 0.002 | 6.85E-09 | 32.65  |
| rs11708067 | A  | G  | 0.013  | 0.002 | 1.42E-12 | 46.81  |
| rs11964178 | A  | G  | 0.010  | 0.002 | 6.38E-10 | 36.00  |
| rs12368284 | A  | G  | 0.012  | 0.002 | 2.92E-10 | 36.00  |
| rs12621844 | C  | T  | -0.010 | 0.002 | 1.87E-08 | 30.25  |
| rs13134327 | A  | G  | 0.013  | 0.002 | 2.64E-15 | 58.48  |
| rs13266634 | C  | T  | 0.015  | 0.002 | 4.53E-20 | 77.85  |
| rs1387153  | C  | T  | -0.019 | 0.002 | 2.11E-24 | 100.00 |
| rs1547247  | A  | G  | -0.014 | 0.002 | 1.73E-17 | 67.82  |
| rs17509001 | C  | T  | 0.018  | 0.002 | 1.94E-15 | 61.25  |
| rs17533903 | A  | G  | 0.015  | 0.002 | 5.27E-12 | 46.49  |
| rs17747324 | C  | T  | 0.015  | 0.002 | 6.12E-11 | 42.53  |
| rs1800562  | A  | G  | -0.04  | 0.004 | 4.67E-28 | 123.46 |
| rs198846   | A  | G  | -0.022 | 0.002 | 1.18E-23 | 100.00 |
| rs2246434  | A  | G  | 0.019  | 0.002 | 1.99E-27 | 111.42 |
| rs2383208  | A  | G  | 0.014  | 0.002 | 7.04E-12 | 44.44  |
| rs267738   | G  | T  | -0.011 | 0.002 | 2.59E-09 | 33.52  |
| rs2979422  | C  | T  | 0.015  | 0.002 | 1.10E-10 | 42.53  |
| rs3782123  | A  | C  | -0.013 | 0.002 | 1.51E-10 | 42.25  |
| rs423117   | C  | T  | -0.019 | 0.003 | 1.30E-12 | 49.52  |
| rs4607517  | A  | G  | 0.031  | 0.002 | 8.76E-38 | 166.84 |
| rs4737009  | A  | G  | 0.021  | 0.002 | 4.48E-27 | 110.25 |
| rs4745982  | G  | T  | -0.095 | 0.006 | 2.87E-65 | 287.79 |
| rs5030913  | G  | T  | -0.013 | 0.002 | 3.56E-13 | 52.16  |
| rs560887   | C  | T  | 0.028  | 0.002 | 1.48E-58 | 241.98 |
| rs579459   | C  | T  | 0.011  | 0.002 | 9.42E-09 | 33.52  |
| rs592423   | A  | C  | 0.009  | 0.002 | 3.96E-08 | 28.65  |
| rs6474359  | C  | T  | -0.044 | 0.005 | 1.50E-16 | 68.92  |
| rs6980507  | A  | G  | 0.010  | 0.002 | 3.58E-08 | 29.04  |
| rs7616006  | A  | G  | 0.010  | 0.002 | 5.07E-10 | 34.60  |
| rs7756992  | A  | G  | -0.012 | 0.002 | 2.80E-12 | 44.44  |
| rs8192675  | C  | T  | -0.011 | 0.002 | 1.38E-11 | 41.87  |
| rs837763   | C  | T  | -0.017 | 0.002 | 1.68E-28 | 112.89 |
| rs855791   | A  | G  | 0.017  | 0.002 | 3.44E-28 | 112.89 |
| rs9818758  | A  | G  | 0.012  | 0.002 | 7.74E-10 | 36.00  |
| rs9914988  | A  | G  | 0.013  | 0.002 | 2.77E-11 | 42.25  |

|           |   |   |       |       |          |       |
|-----------|---|---|-------|-------|----------|-------|
| rs9935401 | A | G | 0.010 | 0.002 | 1.87E-08 | 30.25 |
|-----------|---|---|-------|-------|----------|-------|

---
