# Supplementary material for: Identifying modifiable risk factors of lung cancer: Indications from Mendelian randomization
Source: PubMed Central journal article supplement (PMC8523078; doi:10.1371/journal.pone.0258498), 2021-10-18
Supplement: pone.0258498.s029.pdf [file pone.0258498.s029.pdf]

**S16 Table: Instrumental variables of fasting glucose.** SNP is the rsID of genetic variants; A1 is the effect allele; A2 is the other allele; beta is the effect size of A1 on the exposure; se is the standard error of beta; pval is the p value of beta; F is the F statistics.

| SNP         | A1 | A2 | beta   | se    | pval     | F      |
|-------------|----|----|--------|-------|----------|--------|
| rs10276674  | C  | T  | -0.035 | 0.003 | 4.94E-28 | 120.67 |
| rs10497347  | C  | T  | -0.068 | 0.008 | 6.54E-16 | 65.36  |
| rs11020155  | T  | C  | -0.033 | 0.005 | 1.17E-10 | 41.52  |
| rs11195502  | T  | C  | 0.033  | 0.004 | 1.66E-19 | 81.71  |
| rs1128905   | T  | C  | -0.014 | 0.002 | 2.26E-09 | 35.79  |
| rs11558471  | G  | A  | 0.027  | 0.002 | 5.09E-35 | 152.65 |
| rs11603334  | A  | G  | 0.020  | 0.003 | 5.52E-15 | 61.17  |
| rs11607883  | A  | G  | 0.023  | 0.002 | 4.58E-30 | 129.92 |
| rs11614702  | G  | A  | 0.030  | 0.004 | 1.68E-12 | 49.83  |
| rs116983590 | C  | A  | 0.047  | 0.007 | 1.56E-10 | 40.95  |
| rs11708067  | G  | A  | 0.023  | 0.002 | 4.71E-22 | 93.30  |
| rs11919595  | T  | C  | -0.025 | 0.004 | 9.75E-09 | 32.94  |
| rs11924648  | G  | A  | 0.027  | 0.003 | 2.06E-19 | 81.30  |
| rs12470752  | C  | T  | 0.036  | 0.006 | 1.05E-09 | 37.23  |
| rs12888855  | A  | C  | 0.017  | 0.003 | 7.73E-12 | 46.89  |
| rs13415496  | A  | G  | -0.025 | 0.004 | 1.60E-10 | 40.98  |
| rs16913693  | G  | T  | 0.044  | 0.006 | 5.98E-13 | 51.94  |
| rs174576    | A  | C  | 0.019  | 0.002 | 4.55E-19 | 79.76  |
| rs2232315   | A  | G  | -0.076 | 0.012 | 7.85E-11 | 42.36  |
| rs2383208   | A  | G  | -0.023 | 0.003 | 2.41E-20 | 85.56  |
| rs2715094   | A  | G  | 0.017  | 0.002 | 1.71E-14 | 58.91  |
| rs2785137   | A  | G  | 0.012  | 0.002 | 4.97E-08 | 29.76  |
| rs340874    | T  | C  | 0.016  | 0.002 | 1.34E-15 | 63.98  |
| rs36080963  | C  | T  | -0.046 | 0.008 | 2.04E-08 | 31.46  |
| rs3778321   | A  | G  | 0.016  | 0.003 | 1.04E-09 | 37.31  |
| rs3808320   | T  | C  | 0.051  | 0.008 | 1.10E-09 | 37.20  |
| rs4502156   | C  | T  | 0.021  | 0.002 | 1.32E-24 | 105.03 |
| rs4607517   | A  | G  | -0.059 | 0.003 | 4.32E-97 | 437.36 |
| rs4869272   | T  | C  | -0.017 | 0.002 | 2.03E-16 | 67.69  |
| rs560494    | T  | G  | -0.024 | 0.003 | 2.12E-14 | 58.49  |
| rs6048205   | A  | G  | -0.034 | 0.005 | 8.07E-13 | 51.35  |
| rs6598541   | A  | G  | -0.012 | 0.002 | 1.04E-08 | 32.81  |
| rs700548    | A  | G  | -0.038 | 0.007 | 2.77E-08 | 30.91  |
| rs7034200   | C  | A  | 0.016  | 0.002 | 1.28E-14 | 59.51  |
| rs7142571   | A  | C  | -0.016 | 0.003 | 1.94E-09 | 36.08  |
| rs7178572   | A  | G  | 0.012  | 0.002 | 2.70E-08 | 30.95  |
| rs7589456   | T  | C  | 0.053  | 0.009 | 2.88E-09 | 35.26  |
| rs76323047  | A  | G  | 0.057  | 0.006 | 8.23E-20 | 83.00  |
| rs76639975  | G  | A  | -0.069 | 0.010 | 3.81E-11 | 43.71  |

|            |   |   |        |       |               |        |
|------------|---|---|--------|-------|---------------|--------|
| rs77769873 | A | G | 0.067  | 0.012 | 5.34E-09      | 34.06  |
| rs780093   | T | C | 0.031  | 0.002 | 4.87E-50      | 221.43 |
| rs7903146  | T | C | -0.024 | 0.002 | 6.32E-26      | 110.96 |
| rs79621919 | G | A | -0.083 | 0.013 | 5.25E-10      | 38.58  |
| rs8044995  | A | G | 0.016  | 0.003 | 5.76E-09      | 33.95  |
| rs8103278  | A | G | -0.012 | 0.002 | 2.79E-08      | 30.89  |
| rs853777   | T | C | 0.178  | 0.006 | 1.00E-<br>200 | 929.26 |
| rs9356744  | C | T | -0.013 | 0.002 | 2.12E-09      | 35.92  |
| rs954750   | T | C | -0.022 | 0.003 | 4.54E-14      | 57.00  |
| rs983309   | T | G | -0.029 | 0.003 | 2.09E-21      | 90.38  |

---
