# Supplementary material for: Identifying modifiable risk factors of lung cancer: Indications from Mendelian randomization
Source: PubMed Central journal article supplement (PMC8523078; doi:10.1371/journal.pone.0258498), 2021-10-18
Supplement: pone.0258498.s030.pdf [file pone.0258498.s030.pdf]

**S17 Table: Instrumental variables of 2-h glucose.** SNP is the rsID of genetic variants; A1 is the effect allele; A2 is the other allele; beta is the effect size of A1 on the exposure; se is the standard error of beta; pval is the p value of beta; F is the F statistics.

| <b>SNP</b> | <b>A1</b> | <b>A2</b> | <b>beta</b> | <b>se</b> | <b>pval</b> | <b>F</b> |
|------------|-----------|-----------|-------------|-----------|-------------|----------|
| rs10056271 | A         | C         | 0.150       | 0.032     | 2.03E-06    | 21.97    |
