# Supplementary material for: Identifying modifiable risk factors of lung cancer: Indications from Mendelian randomization
Source: PubMed Central journal article supplement (PMC8523078; doi:10.1371/journal.pone.0258498), 2021-10-18
Supplement: pone.0258498.s031.pdf [file pone.0258498.s031.pdf]

**S18 Table: Instrumental variables of fasting insulin.** SNP is the rsID of genetic variants; A1 is the effect allele; A2 is the other allele; beta is the effect size of A1 on the exposure; se is the standard error of beta; pval is the p value of beta; F is the F statistics.

| <b>SNP</b> | <b>A1</b> | <b>A2</b> | <b>beta</b> | <b>se</b> | <b>pval</b> | <b>F</b> |
|------------|-----------|-----------|-------------|-----------|-------------|----------|
| rs11127048 | G         | A         | 0.034       | 0.005     | 6.87E-11    | 42.55    |
| rs1167834  | A         | G         | 0.032       | 0.005     | 1.84E-10    | 40.63    |
| rs2169387  | A         | G         | -0.050      | 0.008     | 4.99E-11    | 43.18    |
| rs28567725 | T         | C         | 0.035       | 0.005     | 5.71E-12    | 47.43    |
| rs7985878  | C         | T         | -0.027      | 0.005     | 4.88E-08    | 29.76    |
